# Supplementary material for: Aggression in Group-Housed Male Mice: A Systematic Review
Source: Animals (Basel). 2022 Dec 30;13(1):143. doi: 10.3390/ani13010143 (PMC9817818; doi:10.3390/ani13010143)
Supplement: Supplementary file 1 [file animals-13-00143-s001.zip › Supplementary Information Search strings.pdf]

## Supplementary Information: Search strings

### The initial search strings for Medline was:

1. exp Aggression/
2. Anxiety/
3. ((aggressi\* or anxiety or fight\* or injur\* or stress\* or wound\*) adj3 (male adj3 (mice or mouse))).ti,ab,kf.
4. (behavio\* adj3 (defence or defense or social or submission or territorial)).ti,ab,kf.
5. (social\* adj3 (conflict or dominan\* or hierarch\* or position\* or rank\* or relationship\*)).ti,ab,kf.
6. (territorial adj3 (defence or defense)).ti,ab,kf.
7. or/1-6
8. Housing, Animal/
9. Animal Husbandry/
10. (male adj3 (mice or mouse) adj3 (hous\* or husbandry)).ti,ab,kf.
11. ((cage\* or cohous\* or hous\*) adj3 (aggressi\* or condition or environment or group\* or individual or isolat\* or separat\* or singl\* or social\*)).ti,ab,kf.
12. or/8-11
13. exp Mice/
14. Male/
15. 13 and 14
16. (male adj3 (mice or mouse)).ti,ab,kf.
17. or/15-16
18. 7 and 12 and 17
19. limit 18 to english language

### The initial search strings for Embase was:

- #1 'aggression'/exp
- #2 'anxiety'/de
- #3 (male NEAR/3 (mice OR mouse) NEAR/3 (aggressi\* OR anxiety OR fight\* OR injur\* OR stress\* OR wound\*)):ti,ab,kw
- #4 (behavio\* NEAR/3 (defence OR defense OR social OR submission OR territorial)):ti,ab,kw
- #5 (social\* NEAR/3 (conflict OR dominan\* OR hierarch\* OR position\* OR

rank\* OR relationship\*)):ti,ab,kw

#6 (territorial NEAR/3 (defence OR defense)):ti,ab,kw

#7 #1 OR #2 OR #3 OR #4 OR #5 OR #6

#8 'animal housing'/de

#9 'animal husbandry'/de

#10 (male NEAR/3 (mice OR mouse) NEAR/3 (hous\* OR husbandry)):ti,ab,kw

#11 ((cage\* OR cohous\* OR hous\*) NEAR/3 (aggressi\* OR condition OR environment OR group\* OR individual OR isolat\* OR separat\* OR singl\* OR social\*)):ti,ab,kw

#12 #8 OR #9 OR #10 OR #11

#13 'mouse'/exp

#14 'male animal'/de

#15 (male NEAR/3 (mice OR mouse)):ti,ab,kw

#16 #13 OR #14 OR #15

#17 #7 AND #12 AND #16 AND [english]/lim

#18 #17 AND ('article'/it OR 'article in press'/it OR 'conference paper'/it OR 'review'/it)

### **The initial search strings for Web of Science was:**

#1 TOPIC: (((aggressi\* or anxiety or fight\* or injur\* or stress\* or wound\*) NEAR/3 (male NEAR/3 (mice or mouse)))) OR TOPIC: ((behavio\* NEAR/3 (defence or defense or social or submission or territorial))) OR TOPIC: ((social\* NEAR/3 (conflict or dominan\* or hierarch\* or position\* or rank\* or relationship\*))) OR TOPIC: ((territorial NEAR/3 (defence or defense)))

#2 TOPIC: ((male NEAR/3 (mice or mouse) NEAR/3 (hous\* or husbandry))) OR TOPIC: (((cage\* or cohous\* or hous\*) NEAR/3 (aggressi\* or condition or environment or group\* or individual or isolat\* or separat\* or singl\* or social\*)))

#3 TOPIC: ((male NEAR/3 (mice or mouse)))

#4 #1 AND #2 AND #3 AND LANGUAGES: (ENGLISH)

#5 #4 Refined by: DOCUMENT TYPES: (ARTICLE OR PROCEEDINGS PAPER OR REVIEW)
