# Supplementary material for: Aggression in Group-Housed Male Mice: A Systematic Review
Source: Animals (Basel). 2022 Dec 30;13(1):143. doi: 10.3390/ani13010143 (PMC9817818; doi:10.3390/ani13010143)
Supplement: Supplementary file 1 [file animals-13-00143-s001.zip › Supplementary Tables S1-S5.xlsx]

## Sheet: Suppl Table S1
Table S1. Raw data - information extracted from all included articles
ArticleID	Experiment ID	Authors	Journal	Year	ArticleTitle	Breeder	Strain	SampleSize	Age	Sex	NoAnimalsCage	Group composition eg. sibling/non-sibling	Housing condition before grouping	CageType	CleaningRoutines	Interior	AggressionMeasured 1	AggressionMeasured 2	AggressionMeasured 3	AggressionMeasured 4	Treatment (yes/no)	Treatment	WithinBetween	CrossoverDesign	Outcome (increae/decrease)	OutcomeTreatment	Notes
1	01.1	Marashi, Vera, Angelika Barnekow, Edith Ossendorf, and Norbert Sachser.	Hormones and Behavior	2003	Effects of different forms of environmental enrichment on behavioral, endocrinological, and immunological parameters in male mice	In house	Congenic mice strain CS of the inbread strain ABG	36 (12 per treatment)	Weaned 22±1, beahvioural invest. 62±2 until 76±3	Male	4	Siblings	Reduced to groups of 4 males at 3-4 days of age, kept together untill weaning and still in the same goups during the experiment.	Open cage:Makrolon type III, (37.5x 22 x5 cm) OR spacious glass terraria for super enriched (100x40x34.5cm)	Once weekly	Standard (wood shavings) OR Enrichment (plastic inset and a wooden scaffolding) OR Superencriched (extra plains, plastic stairs, wooden footpaths, hemp ropes, and a climbing tree. Furthermore, food and water were available at a second food place and water bottle)	Home cage behaviour				Yes	Enrichment	Between	N/a	Increased aggression in enriched cage as compared to standard	Enrichment cause a statistical increase in agnostic behaviour. No difference between the different types of enrichment. - Defending territorries?	Siblings together from birth. The super enriched environment is also a lot bigger than the standard and enriched cage - thus giving an effect of spece allowance/mice. The authors state that: Interestingly, the degree of enrichment as well as the size of the enriched cages seems to be of minor importance in causing agonistic behavior, since no significant differences existed in frequency and durat…
1	01.2	Marashi, Vera, Angelika Barnekow, Edith Ossendorf, and Norbert Sachser.	Hormones and Behavior	2003	Effects of different forms of environmental enrichment on behavioral, endocrinological, and immunological parameters in male mice	In house	Congenic mice strain CS of the inbread strain ABG	36 (12 per treatment)	Weaned 22±1, beahvioural invest. 62±2 until 76±3	Male	4	Siblings	Reduced to groups of 4 males at 3-4 days of age, kept together untill weaning and still in the same goups during the experiment.	Open cage: Makrolon type III, (37.5x 22 x5 cm) OR spacious glass terraria for super enriched (100x40x34.5cm)	Once weekly	Standard (wood shavings) OR Enrichment (plastic inset and a wooden scaffolding) OR Superencriched (extra plains, plastic stairs, wooden footpaths, hemp ropes, and a climbing tree. Furthermore, food and water were available at a second food place and water bottle)	Home cage behaviour				Yes	Enrichment	Between	N/a	Increased aggression in super enriched cage as compared to standard	Enrichment cause a statistical increase in agnostic behaviour. No difference between the different types of enrichment. - Defending territorries?	Siblings together from birth. The super enriched environment is also a lot bigger than the standard and enriched cage - thus giving an effect of spece allowance/mice. The authors state that: Interestingly, the degree of enrichment as well as the size of the enriched cages seems to be of minor importance in causing agonistic behavior, since no significant differences existed in frequency and durat…
1	01.3	Marashi, Vera, Angelika Barnekow, Edith Ossendorf, and Norbert Sachser.	Hormones and Behavior	2003	Effects of different forms of environmental enrichment on behavioral, endocrinological, and immunological parameters in male mice	In house	Congenic mice strain CS of the inbread strain ABG	36 (12 per treatment)	Weaned 22±1, beahvioural invest. 62±2 until 76±3	Male	4	Siblings	Reduced to groups of 4 males at 3-4 days of age, kept together untill weaning and still in the same goups during the experiment.	Open cage: Makrolon type III, (37.5x 22 x5 cm) OR spacious glass terraria for super enriched (100x40x34.5cm)	Once weekly	Standard (wood shavings) OR Enrichment (plastic inset and a wooden scaffolding) OR Superencriched (extra plains, plastic stairs, wooden footpaths, hemp ropes, and a climbing tree. Furthermore, food and water were available at a second food place and water bottle)	Home cage behaviour				Yes	Enrichment	Between	N/a	No difference in aggression between enriched and super enriched	Enrichment cause a statistical increase in agnostic behaviour. No difference between the different types of enrichment. - Defending territorries?	Siblings together from birth. The super enriched environment is also a lot bigger than the standard and enriched cage - thus giving an effect of spece allowance/mice. The authors state that: Interestingly, the degree of enrichment as well as the size of the enriched cages seems to be of minor importance in causing agonistic behavior, since no significant differences existed in frequency and durat…
2	02.1	Van Loo, P. L., J. A. Mol, J. M. Koolhaas, B. F. Van Zutphen, and V. Baumans.	Physiology & Behavior	2001	Modulation of aggression in male mice: influence of group size and cage size	Not mentioned	BALB/CAnNCrlBr	96 in total, 6 groups/group size	7 weeks at start of experiment, studied for 14 weeks thereafter	Male	3 OR 5 OR 8	Not mentioned	Not mentioned	Open cage: wire-topped clear Perspex cages - Makrolon type II or Makrolon type III or Type 2154 F	Once weekly	Saw dust	Home cage behaviour after cage cleaning	Wound count			Yes	Group size	Between	N/a	Increased aggression with increasing group size	Group size effect on frequency and duration of agnostic behaviour. Both increasing with increasing group size. Multiple comparisons reveal htat differences in frequency were mainly due to differences between groups of 8 and groups of 3 or 5. Differences in duration are most obvoius between groups of 3 and 8. Agnostic encounters between nondominant animals occured more often in groups of 8 than gr…	Cages adjusted to a density of 80 or 125 cm2 per mouse. It is concluded that aggressive behavior in group-housed male BALB/c mice is best prevented by housing the animals in small groups of three to five animals, while decreasing floor size per animal may be used as a temporary solution to decrease high levels of aggression in an existing social group. Other data correlating with aggression: Sple…
2	02.2	Van Loo, P. L., J. A. Mol, J. M. Koolhaas, B. F. Van Zutphen, and V. Baumans.	Physiology & Behavior	2001	Modulation of aggression in male mice: influence of group size and cage size	Not mentioned	BALB/CAnNCrlBr	96 in total 6 groups/group size	7 weeks at start of experiment, studied for 14 weeks thereafter	Male	3 OR 5 OR 8	Not mentioned	Not mentioned	Open cage: wire-topped clear Perspex cages - Makrolon type II or Makrolon type III or Type 2154 F	Once weekly	Saw dust	Home cage behaviour after cage cleaning	Wound count			yes	Cage size	Within	Yes	Increase with increasing cage size.	Cage size effect on duration. Significantly higher duration of agnostic behaviour in larger cages. Increased numbers of wound counts in larger cages. There is also a significant cage sixe x group size interaction. In groups of 5 the frequency of agnostic encounters was higher in larger cages, while no differens in groups of 3 or 8. States in discussion that:the effect of cage size on agonistic be…	Cages adjusted to a density of 80 or 125 cm2 per mouse. It is concluded that aggressive behavior in group-housed male BALB/c mice is best prevented by housing the animals in small groups of three to five animals, while decreasing floor size per animal may be used as a temporary solution to decrease high levels of aggression in an existing social group. Other data correlating with aggression: Sple…
2	02.3	Van Loo, P. L., J. A. Mol, J. M. Koolhaas, B. F. Van Zutphen, and V. Baumans.	Physiology & Behavior	2001	Modulation of aggression in male mice: influence of group size and cage size	Not mentioned	BALB/CAnNCrlBr	96 in total 6 groups/group size	7 weeks at start of experiment, studied for 14 weeks thereafter	Male	3 OR 5 OR 8	Not mentioned	Not mentioned	Open cage: wire-topped clear Perspex cages - Makrolon type II or Makrolon type III or Type 2154 F	Once weekly	Saw dust	Home cage behaviour after cage cleaning	Wound count			yes	Age	Within	No	Increased aggression with increasing age	Increasing age --> more agnostic behaviour. Wound count: increasing between 7 and 10 week and then stabilises	Cages adjusted to a density of 80 or 125 cm2 per mouse. It is concluded that aggressive behavior in group-housed male BALB/c mice is best prevented by housing the animals in small groups of three to five animals, while decreasing floor size per animal may be used as a temporary solution to decrease high levels of aggression in an existing social group. Other data correlating with aggression: Sple…
3	03.1	Bailoo, Jeremy D., Eimear Murphy, Justin A. Varholick, Janja Novak, Rupert Palme, and Hanno Wurbel.	Scientific Reports	2018	Evaluation of the effects of space allowance on measures of animal welfare in laboratory mice	Charles river, France	BALB C	192	21-25 days at delivery, behavioural study performed in week 13 of the experiment	Male	3 or 5 or 8	Non-sibling	Not mentioned	Open cage: Makrolon type 2 and type 3. "Pet" polycarbonate cage	Weekly in dark phase	2 cm Wood shavings, 10-11 g shredded paper as nesting material	Descriptive observation				Yes	Cage size	Between	N/a	Increase	Aggression not one of the outcomes but the study surprisengly noted that: 20 cages of 36 with BALB males reached eraly termination due to fighting (onset of fighting at 8 weeks of age). Attrition due to aggression increased with incresing group size and increasing floor area. The lowest level of attrition in smalles group size in smallest floor area. BALB male mice only.	only included aggressionrelated data (attrition due to aggression) and males (192 male BALB)
3	03.2	Bailoo, Jeremy D., Eimear Murphy, Justin A. Varholick, Janja Novak, Rupert Palme, and Hanno Wurbel.	Scientific Reports	2018	Evaluation of the effects of space allowance on measures of animal welfare in laboratory mice	Charles river, France	BALB C	192	21-25 days at delivery, behavioural study performed in week 13 of the experiment	Male	3 or 5 or 8	Non-sibling	Not mentioned	Open cage: Makrolon type 2 and type 3. "Pet" polycarbonate cage	Weekly in dark phase	2 cm Wood shavings, 10-11 g shredded paper as nesting material	Descriptive observation				Yes	Group Size	Between	N/a	Increase	! Aggression not one of the outcomes but the study surprisengly noted that: 20 cages of 36 with BALB males reached eraly termination due to fighting (onset of fighting at 8 weeks of age). Attrition due to aggression increased with incresing group size and increasing floor area. The lowest level of attrition in smalles group size in smallest floor area. BALB male mice only.	only included aggressionrelated data (attrition due to aggression) and males (192 male BALB)
4	04.1	Smith, Abigail L., Sarah L. Mabus, Cameron Muir, and Yong Woo.	Comparative Medicine	2005	Effects of housing density and cage floor space on three strains of young adult inbred mice	JAX Research systems	FVB/NJ	538 mice for each strain except BALB - 1076	3 weeks (3-5weeks for FVB/NJ) at start of experiment, housed for 8 weeks	Male	4, 6, 8, or 9	Non-sibling	Grouped at arrival then housed for 8 weeks	Thoren Caging Systems: Duplex cages, Weaning cages and Thoren #1 shoebox - Positivly ventilated cage rack	Weekly	White pine shavings	Descriptive observation: Daily assessment of injury, aggression and survival	Descriptive observation: Behaviour after cage change			Yes	Cage type	Between	N/a	Incresed aggression in FVB mice dependent on cage type	Cage type and housing density did not have an impact on aggressive behaviour except for FVB mice. FVB very aggressive first 7-10 days of study when housed in duplex or weaning cage. In shobox aggressive behaviour apperad in the fifth week.
4	04.2	Smith, Abigail L., Sarah L. Mabus, Cameron Muir, and Yong Woo.	Comparative Medicine	2005	Effects of housing density and cage floor space on three strains of young adult inbred mice	JAX Research systems	BALB/cJ and NOD/Ltj	538 mice for each strain except BALB - 1076	3 weeks (3-5weeks for FVB/NJ) at start of experiment, housed for 8 weeks	Male	4, 6, 8, or 9	Non-sibling	Grouped at arrival then housed for 8 weeks	Thoren Caging Systems: Duplex cages, Weaning cages and Thoren #1 shoebox - Positivly ventilated cage rack	Weekly	White pine shavings	Descriptive observation: Daily assessment of injury, aggression and survival	Descriptive observation: Behaviour after cage change			Yes	Strain			No aggression observed in NOD or BALB	No aggressive behaviour or injuries observed in BALB and NOD. Cage type and housing density did not have an impact on aggressive behaviour.
4	04.3	Smith, Abigail L., Sarah L. Mabus, Cameron Muir, and Yong Woo.	Comparative Medicine	2005	Effects of housing density and cage floor space on three strains of young adult inbred mice	JAX Research systems	FVB and NOD/LtJ	538 mice for each strain	3 weeks (3-5weeks for FVB/NJ) at start of experiment, housed for 8 weeks	Male	4, 6, 8, or 9	Non-sibling	Grouped at arrival then housed for 8 weeks	Thoren Caging Systems: Duplex cages, Weaning cages and Thoren #1 shoebox - Positivly ventilated cage rack	Weekly	White pine shavings	Descriptive observation: Daily assessment of injury, aggression and survival	Descriptive observation: Behaviour after cage change			Yes	Strain			Incresed aggression in FVB mice as compared to NOD	No aggressive behaviour or injuries observed in BALB and NOD. FVB very aggressive first 7-10 days of study when housed in duplex or weaning cage. In shobox aggressive behaviour apperad in the fifth week.
4	04.4	Smith, Abigail L., Sarah L. Mabus, Cameron Muir, and Yong Woo.	Comparative Medicine	2005	Effects of housing density and cage floor space on three strains of young adult inbred mice	JAX Research systems	BALB/cJ, and FVB/NJ	538 mice for each strain except BALB - 1076	3 weeks (3-5weeks for FVB/NJ) at start of experiment, housed for 8 weeks	Male	4, 6, 8, or 9	Non-sibling	Grouped at arrival then housed for 8 weeks	Thoren Caging Systems: Duplex cages, Weaning cages and Thoren #1 shoebox - Positivly ventilated cage rack	Weekly	White pine shavings	Descriptive observation: Daily assessment of injury, aggression and survival	Descriptive observation: Behaviour after cage change			Yes	Different strains	Between	N/a	Incresed aggression in FVB mice as compared to BALB	No aggressive behaviour or injuries observed in BALB and NOD. FVB very aggressive first 7-10 days of study when housed in duplex or weaning cage. In shobox aggressive behaviour apperad in the fifth week.
4	04.5	Smith, Abigail L., Sarah L. Mabus, Cameron Muir, and Yong Woo.	Comparative Medicine	2005	Effects of housing density and cage floor space on three strains of young adult inbred mice	JAX Research systems	BALB/cJ	538 mice for each strain except BALB - 1076	3 weeks (3-5weeks for FVB/NJ) at start of experiment, housed for 8 weeks	Male	4, 6, 8, or 9	Non-sibling	Grouped at arrival then housed for 8 weeks	Thoren Caging Systems: Duplex cages, Weaning cages and Thoren #1 shoebox - Positivly ventilated cage rack	Weekly	White pine shavings	Descriptive observation: Daily assessment of injury, aggression and survival	Descriptive observation: Behaviour after cage change			Yes	Cage type	Between	N/a	No effect on aggression in BALB/c	Cage type and housing density did not have an impact on aggressive behaviour except for FVB mice. FVB very aggressive first 7-10 days of study when housed in duplex or weaning cage. In shobox aggressive behaviour apperad in the fifth week.
4	04.6	Smith, Abigail L., Sarah L. Mabus, Cameron Muir, and Yong Woo.	Comparative Medicine	2005	Effects of housing density and cage floor space on three strains of young adult inbred mice	JAX Research systems	NOD/LtJ	538 mice for each strain except BALB - 1076	3 weeks (3-5weeks for FVB/NJ) at start of experiment, housed for 8 weeks	Male	4, 6, 8, or 9	Non-sibling	Grouped at arrival then housed for 8 weeks	Thoren Caging Systems: Duplex cages, Weaning cages and Thoren #1 shoebox - Positivly ventilated cage rack	Weekly	White pine shavings	Descriptive observation: Daily assessment of injury, aggression and survival	Descriptive observation: Behaviour after cage change			Yes	Cage type	Between	N/a	No effect on aggression in NOD	Cage type and housing density did not have an impact on aggressive behaviour except for FVB mice. FVB very aggressive first 7-10 days of study when housed in duplex or weaning cage. In shobox aggressive behaviour apperad in the fifth week.
5	05.1	Mesa-Gresa, Patricia, Asuncion Perez-Martinez, and Rosa Redolat.	Aggressive Behavior	2013	Environmental enrichment improves novel object recognition and enhances agonistic behavior in male mice	Charles river, Barcelona	NMRI	32 (32 extra used as opponents)	21 days at arrival, 28 days group allocation, 58 days social interaction test	Male	4 for standard, 8 for EE	Not mentioned	21 days at arrival, housed 4 by 4 untill day 28, then transfered to experimental housing	Large cages or standard cages?	Not mentioned but: Toys changed twice a week.	S: nothing OR EE: House, running wheel, a tunnel and 5 different toys.	Social interaction test in neutral cage				Yes	Enrichment	Between	N/a	Increased aggression in mice from enriched cages	The EE paradigm increased agonistic behavior during social interactions in this strain of mice. The results obtained in the social interaction testshowed that animals reared under EE conditions engaged more frequently and for longer periods of time in social exploration behaviors (or “sociability”) and threat episodes (or “agonistic behavior”) and spent less time engaged in non‐social behaviors t…	The number of mice differ in the two different treatments 8 in EE, 4 in SE
6	06.1	Swetter, B. J., C. P. Karpiak, and J. T. Cannon.	Neuroscience Letters	2011	Separating the Effects of Shelter from Additional Cage Enhancements for Group-Housed BALB/CJ Mice	In house, breeding stock originally from Jackson Laboratory, Bar Harbor, Maine	BALB/cJ	51	Weaned at 28 days then grouped and keept at experimental housing for minimum 8 weeks before experiments	Male	3 or 4	Not mentioned	Weaned and grouped into experimental groups, random or not is not mentioned	Open cage: Standard polycarbonate cages (22x16,5x13,6)	Every 3 day, toys were then also changed	ST: Wood chip bedding OR IG: Wood chip bedding + red Mouse igloo OR INO: Wood chip, Mouse igloo and one toy OR IRW: wood chip + mouse igloo + running wheel	Indirect quantification of cage aggression via ratings of evidence of biting	Wounding (only as yes/no)			Yes	Enrichment	Between	N/a	No effect - iglo vs. standard	Adding an Igloo to the standard cage increased longevity and maintained low signs of biting aggression. Males differed significantly by condition on the aggression score (F = 7.53, p < .001, partial 2 = .33). Scores of 0 were assigned to 86% of INO males, 80% of IG, 60% of ST, and 25% of IRW. Scores of 3, the highest seen during this assessment, were assigned to 40% of ST, 50% of IRW, and none of…	The poor survival in ST group-housed males, evidently related to aggression in mostcases, warrants attention. Our results suggest that the Mouse Igloo® (IG) on its own creates a very differenthomecage environment for BALB/cJ males thandoes an identical Igloo with the Fast Trac® running wheel (IRW) attached, with implications for behavioral testing and animal wellbeing. Adding an Igloo to the stan…
6	06.2	Swetter, B. J., C. P. Karpiak, and J. T. Cannon.	Neuroscience Letters	2011	Separating the Effects of Shelter from Additional Cage Enhancements for Group-Housed BALB/CJ Mice	In house, breeding stock originally from Jackson Laboratory, Bar Harbor, Maine	BALB/cJ	51	Weaned at 28 days then grouped and keept at experimental housing for minimum 8 weeks before experiments	Male	3 or 4	Not mentioned	Weaned and grouped into experimental groups, random or not is not mentioned	Open cage: Standard polycarbonate cages (22x16,5x13,6)	Every 3 day, toys were then also changed	ST: Wood chip bedding OR IG: Wood chip bedding + red Mouse igloo OR INO: Wood chip, Mouse igloo and one toy OR IRW: wood chip + mouse igloo + running wheel	Indirect quantification of cage aggression via ratings of evidence of biting	Wounding (only as yes/no)			Yes	Enrichment	Between	N/a	No effect - iglo + toy vs. standard	Males differed significantly by condition on the aggression score (F = 7.53, p < .001, partial 2 = .33). Scores of 0 were assigned to 86% of INO males, 80% of IG, 60% of ST, and 25% of IRW. Scores of 3, the highest seen during this assessment, were assigned to 40% of ST, 50% of IRW, and none of the INO or IG. Results for presence/absence of wounding were significant ( 2 = 12.63, p = .006, Phi = .…	The poor survival in ST group-housed males, evidently related to aggression in mostcases, warrants attention. Our results suggest that the Mouse Igloo® (IG) on its own creates a very differenthomecage environment for BALB/cJ males thandoes an identical Igloo with the Fast Trac® running wheel (IRW) attached, with implications for behavioral testing and animal wellbeing. Adding an Igloo to the stan…
6	06.3	Swetter, B. J., C. P. Karpiak, and J. T. Cannon.	Neuroscience Letters	2011	Separating the Effects of Shelter from Additional Cage Enhancements for Group-Housed BALB/CJ Mice	In house, breeding stock originally from Jackson Laboratory, Bar Harbor, Maine	BALB/cJ	51	Weaned at 28 days then grouped and keept at experimental housing for minimum 8 weeks before experiments	Male	3 or 4	Not mentioned	Weaned and grouped into experimental groups, random or not is not mentioned	Open cage: Standard polycarbonate cages (22x16,5x13,6)	Every 3 day, toys were then also changed	ST: Wood chip bedding OR IG: Wood chip bedding + red Mouse igloo OR INO: Wood chip, Mouse igloo and one toy OR IRW: wood chip + mouse igloo + running wheel	Indirect quantification of cage aggression via ratings of evidence of biting	Wounding (only as yes/no)			Yes	Enrichment	Between	N/a	No effect - iglo + wheel vs. standard	Males differed significantly by condition on the aggression score (F = 7.53, p < .001, partial 2 = .33). Scores of 0 were assigned to 86% of INO males, 80% of IG, 60% of ST, and 25% of IRW. Scores of 3, the highest seen during this assessment, were assigned to 40% of ST, 50% of IRW, and none of the INO or IG. Results for presence/absence of wounding were significant ( 2 = 12.63, p = .006, Phi = .…	The poor survival in ST group-housed males, evidently related to aggression in mostcases, warrants attention. Our results suggest that the Mouse Igloo® (IG) on its own creates a very differenthomecage environment for BALB/cJ males thandoes an identical Igloo with the Fast Trac® running wheel (IRW) attached, with implications for behavioral testing and animal wellbeing. Adding an Igloo to the stan…
6	06.4	Swetter, B. J., C. P. Karpiak, and J. T. Cannon.	Neuroscience Letters	2011	Separating the Effects of Shelter from Additional Cage Enhancements for Group-Housed BALB/CJ Mice	In house, breeding stock originally from Jackson Laboratory, Bar Harbor, Maine	BALB/cJ	51	Weaned at 28 days then grouped and keept at experimental housing for minimum 8 weeks before experiments	Male	3 or 4	Not mentioned	Weaned and grouped into experimental groups, random or not is not mentioned	Open cage: Standard polycarbonate cages (22x16,5x13,6)	Every 3 day, toys were then also changed	ST: Wood chip bedding OR IG: Wood chip bedding + red Mouse igloo OR INO: Wood chip, Mouse igloo and one toy OR IRW: wood chip + mouse igloo + running wheel	Indirect quantification of cage aggression via ratings of evidence of biting	Wounding (only as yes/no)			Yes	Enrichment	Between	N/a	No effect - iglo + toy vs. iglo	Adding novel objects (= toys) to an Igloo did not increase aggression. Males differed significantly by condition on the aggression score (F = 7.53, p < .001, partial 2 = .33). Scores of 0 were assigned to 86% of INO males, 80% of IG, 60% of ST, and 25% of IRW. Scores of 3, the highest seen during this assessment, were assigned to 40% of ST, 50% of IRW, and none of the INO or IG. Results for prese…	The poor survival in ST group-housed males, evidently related to aggression in mostcases, warrants attention. Our results suggest that the Mouse Igloo® (IG) on its own creates a very differenthomecage environment for BALB/cJ males thandoes an identical Igloo with the Fast Trac® running wheel (IRW) attached, with implications for behavioral testing and animal wellbeing. Adding an Igloo to the stan…
6	06.5	Swetter, B. J., C. P. Karpiak, and J. T. Cannon.	Neuroscience Letters	2011	Separating the Effects of Shelter from Additional Cage Enhancements for Group-Housed BALB/CJ Mice	In house, breeding stock originally from Jackson Laboratory, Bar Harbor, Maine	BALB/cJ	51	Weaned at 28 days then grouped and keept at experimental housing for minimum 8 weeks before experiments	Male	3 or 4	Not mentioned	Weaned and grouped into experimental groups, random or not is not mentioned	Open cage: Standard polycarbonate cages (22x16,5x13,6)	Every 3 day, toys were then also changed	ST: Wood chip bedding OR IG: Wood chip bedding + red Mouse igloo OR INO: Wood chip, Mouse igloo and one toy OR IRW: wood chip + mouse igloo + running wheel	Indirect quantification of cage aggression via ratings of evidence of biting	Wounding (only as yes/no)			Yes	Enrichment	Between	N/a	Increased aggression when combining wheel and iglo as compared to iglo alone or iglo + toy	Addition of the running wheel to the Igloo caused marked increases in signs of aggression. Males differed significantly by condition on the aggression score (F = 7.53, p < .001, partial 2 = .33). Scores of 0 were assigned to 86% of INO males, 80% of IG, 60% of ST, and 25% of IRW. Scores of 3, the highest seen during this assessment, were assigned to 40% of ST, 50% of IRW, and none of the INO or I…	The poor survival in ST group-housed males, evidently related to aggression in mostcases, warrants attention. Our results suggest that the Mouse Igloo® (IG) on its own creates a very differenthomecage environment for BALB/cJ males thandoes an identical Igloo with the Fast Trac® running wheel (IRW) attached, with implications for behavioral testing and animal wellbeing. Adding an Igloo to the stan…
7	07.1	Workman, J. L., L. K. Fonken, J. Gusfa, K. M. Kassouf, and R. J. Nelson.	Pharmacology, Biochemistry and Beahvior	2011	Post-Weaning Environmental Enrichment Alters Affective Responses and Interacts with Behavioral Testing to Alter nNOS Immunoreactivity	Jackson Laboratory, Bar Harbor, Maine	C57Bl6/J	60	Arrived as nursing litters at day 17, weaned at day 21 then grouped and put into experimental housing, behavioural tests performed at 60 days of age	Male	3-4 or single	Non-sibling	Arrived as nursing litters at day 17, weaned at day 21 then grouped and put into experimental housing	Open cage: standard cages (27,8 x 17,5 x 13), large cages (45 x 24 x 20) used for the enriched condition	Every 2 weeks	Enriched: running wheel, nest box and habitrail tube	Resident/intruder test				Yes	Enrichment	Between	N/a	No effect on aggression comparing enriched and standard housing	In the resident–intruder aggression test, housing environment had no effect on bouts of boxing (pN0.05; F2,27=2.559), time spent boxing (pN0.05; F2,27=2.716), bouts of biting (pN0.05; F2,27=0.9), or time spent biting (pN0.05; F2,27=0.6902). Housing significantly altered bouts of aggressive grooming and sniffing (pb0.01; F2,27=13.714; Fig. 4A) and time spent aggressively grooming and sniffing (pb0…	fig. 4A show no difference between enriched och standard -only compared to single housed.
8	08.1	Grimm, M. S., J. T. Emerman, and J. Weinberg.	Psycology and Behaviour	1996	Effects of social housing condition and behavior on growth of the Shionogi mouse mammary carcinoma	Not mentioned	DD/S strain	160	Weaned at 3 weeks, then housed experimentally, at 2-4 months of age injected with tumor cells and behavioural study began 10 days before injection and finished 18 days after injection	Male	3 or 5	Treatment - sibling and non-siling tested	Weaned at 3 weeks then into experimental housing	No data	No data	No data	Home cage behaviour in dark period				Yes	Group size	Between	N/a	Increased aggression in groups of 5	Fights~attacks. Overall, there were more fights in groups of five than in groups of three on each observation day (all p < 0.05).	All animals injected with tumours. Main conclusions are on tumor growth, however the pre injection data looka at different group size and fighting behaviour. The following 2 statements are used by the authors: Pre-injection/regrouping There were no differences in either aggressive or defensive behaviors between mice in groups of three and mice in groups of five. Fights~attacks. Overall, there wer…
8	08.2	Grimm, M. S., J. T. Emerman, and J. Weinberg.	Psycology and Behaviour	1996	Effects of social housing condition and behavior on growth of the Shionogi mouse mammary carcinoma	Not mentioned	DD/S strain	160	2-4 month	Male	1 or 3 or 5	Treatment - sibling and non-siling tested	Weaned at 3 weeks then into experimental housing	No data	No data	No data	Home cage behaviour in dark period				Yes	Sibling/non-sibling	Between	N/a	No effect on aggression comparing sibling and non-sibling	Pre-injection/regrouping:No differences between sibling/non-sibling	All animals injected with tumours. Main conclusions are on tumor growth, however the pre injection data looka at different group size and fighting behaviour.Furthermore, a group X days interaction (p < 0.01) indicated that mice in the N3N3 and S3S3 groups maintained the lowest level of fighting (all p < 0.05) and showed no change over days, whereas mice in all other groups showed a decrease in fi…
8	08.3	Grimm, M. S., J. T. Emerman, and J. Weinberg.	Psycology and Behaviour	1996	Effects of social housing condition and behavior on growth of the Shionogi mouse mammary carcinoma	Not mentioned	DD/S strain	160	Weaned at 3 weeks, then housed experimentally, at 2-4 months of age injected with tumor cells and behavioural study began 10 days before injection and finished 18 days after injection	Male	3	Treatment - sibling and non-siling tested	Weaned at 3 weeks then into experimental housing	No data	No data	No data	Home cage behaviour in dark period				Yes	Age/time	Within	No	No effect of time	Mice in groups of five showed a high level of fighting on day 1 and a decrease in fighting over days ( p < 0.05), whereas mice in groups of three showed a consistently low level of fighting on all observation days	All animals injected with tumours. Main conclusions are on tumor growth, however the pre injection data looka at different group size and fighting behaviour. The following 2 statements are used by the authors: Pre-injection/regrouping There were no differences in either aggressive or defensive behaviors between mice in groups of three and mice in groups of five. Fights~attacks. Overall, there wer…
8	08.4	Grimm, M. S., J. T. Emerman, and J. Weinberg.	Psycology and Behaviour	1996	Effects of social housing condition and behavior on growth of the Shionogi mouse mammary carcinoma	Not mentioned	DD/S strain	160	2-4 month	Male	5	Treatment - sibling and non-siling tested	Weaned at 3 weeks then into experimental housing	No data	No data	No data	Home cage behaviour in dark period				Yes	Age/time	Within	No	Decreased aggression with time comparing days 1-2 with 3-4	Mice in groups of five showed a high level of fighting on day 1 and a decrease in fighting over days ( p < 0.05), whereas mice in groups of three showed a consistently low level of fighting on all observation days	All animals injected with tumours. Main conclusions are on tumor growth, however the pre injection data looka at different group size and fighting behaviour: Furthermore, a group X days interaction (p < 0.01) indicated that mice in the N3N3 and S3S3 groups maintained the lowest level of fighting (all p < 0.05) and showed no change over days, whereas mice in all other groups showed a decrease in f…
9	09.1	Fitchett, Ann E. Collins, Sarah A. Mason, Howard Barnard, Christopher J. and Cassaday, Helen J.	Behavioural Processes	2005	Urinary corticosterone measures: effects of strain and social rank in BKW and CD-1 mice	B & K Ltd., UK for BKW AND Harlan, UK, for CD-1	BKW and CD-1	22 for BKW, 30 for CD-1	BKW: starts with 8 weeks old, form pairs at 13 weeks. CD-1: starts with 6 weeks old, form pairs at 8 weeks. For both strains the observation of aggression was performed during the 2 weeks after pairing.	Male	2	Non-sibling	Single housed initially, then pairs formed. Period of single housing shorter for CD-1 than BKW - see notes	Open cage: NPK M3 (48cm×15cm×13 cm) or NPK MB1 (45cm×28cm×13 cm). Study 1 with BKW mice used cages of both dimensions. Study 2 with CD-1 mice used only the NPK M3 cages.	Not mentioned	Not mentioned	Home cage behaviour studied in 30 min observation sessions (one per day), averaged over 4 days’ observations for BKW and 12 days’ observations for CD-1				Yes	Strain	Between	N/a	More aggression in BKW as compared to CD-1	Overall higher number of aggressive acts in BKW relative to CD-1 dyads. BKWmice of both ranks (dominant and subordinate) produced more aggressive behaviours than the CD-1 dyads.	During study 1 (with the BKW mice) some husbandry issues arose, due to unexpectedly high levels of aggression when pairing males. This meant that we had to further refine the methodology used in study 2 (with the CD-1 mice). The changes introduced (reducing the settling period and the number of attempted pairings) were intended to minimise the time that mice spent singly housed as single housing …
10	10.1	Marashi, Vera Barnekow, Angelika and Sachser, Norbert	Physiology & Behavior	2004	Effects of environmental enrichment on males of a docile inbred strain of mice	In house	ABG	36 in total, 12 mice per housing condition	Until weaning (day 22 +/- 1), the four brothers remained in the cage with both parents. Subsequently, they were housed together in one of three different housing conditions in the colony room until day 77 +/- 3 of age. Behaviour scored between 68 +/- 2 and 76 +/- 3 days of age.	Male	4	Siblings	Kept in group with the same siblings form weaning to experiment	Open cage: Transparent polycarbonate cages, Makrolon type III, 37.5x22x15 cm OR spacious glass terrariums (100x40x34.5 cm)	Once weekly	Standard: wood shavings; Enriched: plastic inset and wooden scaffolding	Home cage behaviour				Yes	Enrichment	Between	N/a	No effect on aggression	Frequency and duration of several parameters of aggressive behavior showed that an enrichment of the housing cage had no significant effect on aggressive behaviors of male ABG mice. S-, E-, and SE-mice showed similarly low amounts of attacks, escalated fights, flee, defensive postures, and avoid contact behavior.	The enrichment of the housing cage did not alter aggressive behavior of male mice of the docile strain ABG. Moreover, the degree of enrichment as well as the size of the enriched cages seemed to have no effect on agonistic behavior of ABG males. On the one hand, exceptional low levels of aggressiveness in mice of all housing conditions might be based on the experimental design: We investigated si…
10	10.2	Marashi, Vera Barnekow, Angelika and Sachser, Norbert	Physiology & Behavior	2004	Effects of environmental enrichment on males of a docile inbred strain of mice	In house	ABG	36 in total, 12 mice per housing condition	Until weaning (day 22 +/- 1), the four brothers remained in the cage with both parents. Subsequently, they were housed together in one of three different housing conditions in the colony room until day 77 +/- 3 of age. Behaviour scored between 68 +/- 2 and 76 +/- 3 days of age.	Male	4	Siblings	Kept in group with the same siblings form weaning to experiment	Open cage: Transparent polycarbonate cages, Makrolon type III, 37.5x22x15 cm OR spacious glass terrariums (100x40x34.5 cm)	Once weekly	Standard: wood shavings; Super-enriched: extra plains, plastic stairs, wooden footpaths, hemp ropes, and a climbing tree, food and water were available at a second food place.	Home cage behaviour				Yes	Enrichment	Between	N/a	No effect on aggression	Frequency and duration of several parameters of aggressive behavior showed that an enrichment of the housing cage had no significant effect on aggressive behaviors of male ABG mice. S-, E-, and SE-mice showed similarly low amounts of attacks, escalated fights, flee, defensive postures, and avoid contact behavior.	The enrichment of the housing cage did not alter aggressive behavior of male mice of the docile strain ABG. Moreover, the degree of enrichment as well as the size of the enriched cages seemed to have no effect on agonistic behavior of ABG males. On the one hand, exceptional low levels of aggressiveness in mice of all housing conditions might be based on the experimental design: We investigated si…
10	10.3	Marashi, Vera Barnekow, Angelika and Sachser, Norbert	Physiology & Behavior	2004	Effects of environmental enrichment on males of a docile inbred strain of mice	In house	ABG	36 in total, 12 mice per housing condition	Until weaning (day 22 +/- 1), the four brothers remained in the cage with both parents. Subsequently, they were housed together in one of three different housing conditions in the colony room until day 77 +/- 3 of age. Behaviour scored between 68 +/- 2 and 76 +/- 3 days of age.	Male	4	Siblings	Kept in group with the same siblings form weaning to experiment	Open cage: Transparent polycarbonate cages, Makrolon type III, 37.5x22x15 cm OR spacious glass terrariums (100x40x34.5 cm)	Once weekly	Enriched: plastic inset and wooden scaffolding; Super-enriched: extra plains, plastic stairs, wooden footpaths, hemp ropes, and a climbing tree, food and water were available at a second food place.	Home cage behaviour				Yes	Enrichment	Between	N/a	No effect on aggression	Frequency and duration of several parameters of aggressive behavior showed that an enrichment of the housing cage had no significant effect on aggressive behaviors of male ABG mice. S-, E-, and SE-mice showed similarly low amounts of attacks, escalated fights, flee, defensive postures, and avoid contact behavior.	The enrichment of the housing cage did not alter aggressive behavior of male mice of the docile strain ABG. Moreover, the degree of enrichment as well as the size of the enriched cages seemed to have no effect on agonistic behavior of ABG males. On the one hand, exceptional low levels of aggressiveness in mice of all housing conditions might be based on the experimental design: We investigated si…
11	11.1	Bartolomucci, Alessandro Chirieleison, Alessio Gioiosa, Laura Ceresini, Graziano Parmigiani, Stefano and Palanza, Paola	Physiology & Behavior	2004	Age at group formation alters behavior and physiology in male but not female CD-1 mice	In house, orignially from Charles River Italia (Calco, Lecco, Italy)	CD-1	5-6 mice/group and 8 groups/treatment.	Agonistic behaviour assessed at PND 89 and 96 Weaning at 26-28, age at grouping = treatment,	Male	5-6	Control groups formed from siblings, test groups formed from unfamiliar mice	Grouped at weaning	Not mentioned	Once weekly - I think this can be said from the text under section 3.1	Sawdust mentioned in section 3.1	Home cage behaviour studied for 90min starting 5 min after cage change, groups observed for 1min every 16min for a tital of 6 observations at PND 89 and 96				Yes	Sibling/non-sibling	Between	N/a	Increased aggression in groups formed from non-siblings	Number of attacks was significantly higher for groups formed from juvenile mice (at weaning day 26-28 from unfamiliar mice) compared to control groups (groups of siblings formed at weaning)
11	11.2	Bartolomucci, Alessandro Chirieleison, Alessio Gioiosa, Laura Ceresini, Graziano Parmigiani, Stefano and Palanza, Paola	Physiology & Behavior	2004	Age at group formation alters behavior and physiology in male but not female CD-1 mice	In house, orignially from Charles River Italia (Calco, Lecco, Italy)	CD-1	5-6 mice/group and 8 groups/treatment.	Agonistic behaviour assessed at PND 89 and 96 Weaning at 26-28, age at grouping = treatment,	Male	5-6	Non-sibling	Grouped at weaning or kept with siblings untill group formation	Not mentioned	Once weekly - I think this can be said from the text under section 3.1	Sawdust mentioned in section 3.1	Home cage behaviour studied for 90min starting 5 min after cage change, groups observed for 1min every 16min for a tital of 6 observations at PND 89 and 96				Yes	Age at group formation: Juvenile groups formed at weaning (day 26-28) from unfamiliar animals, adolecent groups formed at day 46-48 from unfamiliar animals	Between	N/a	Increased aggression in groups formed from juvenile mice (at weaning day 26-28) as compared to groups formed from adolecent mice	Number of attacks was significantly higher for groups formed from juvenile mice (at weaning day 26-28 from unfamiliar mice) compared to control groups (groups of siblings formed at weaning) and adolecent groups (formed on day 46-48 from unfamiliar mice)	Interestingly, the strongest effects were observed for male groups formed at weaning. When adults (60 days after groups had been assembled), JUV males showed high aggression levels, as determined in their home cage following sawdust change. In mice, aggressive behavior occurs in bouts. Accordingly our results, collected with a sampling schedule (i.e., two recording sessions 1 week apart, each ses…
12	12.1	Kunkel, Thaddeus and Wang, Hongbing	Behavioural Brain Research	2018	Socially dominant mice in C57BL6 background show increased social motivation	Not mentioned	C57BL6	8 cages with 3-5 mice in each	Grouped at weaning tube dominance test at about 3 moths of age	Male	3-5	Siblings	Grouped at weaning	Laboratory cages, not further specified	Not mentioned	Not mentioned	Descriptive observation				No				No fighting observed	Among all mice in a total of 8 different cages, no obvious fighting was observed, indicating no significant aggressive attacking	Overall, we found that, even in the absence of competition for resource and mating, group housed mice show stable social hierarchy without obvious involvement of aggressive fighting
13	13.1	Zwirner, P. P. Porsolt, R. D. Loew, D. M.	Psychopharmacologia	1975	Inter-group aggression in mice: a new method for testing the effects of centrally active drugs	Sandoz Breeding Station	OF-1	Not mentioned	Delivered at 8 weeks of age, kept in groups of 3 for 21 days	Male	3	Non-sibling	Kept in large cages in groups of 50 untill delivery then in groups of 3	Open cage: macrolon living cage (42 x 13 x 15 cm) which was divided down the middle by a non-transparent PVC barrier, one group kept on each side	Sawdust not changed during the course of the experiment	Sawdust	Descriptive observation				Yes	Time	Within	No	Increase and then subside	The frequency of fighting increased during the first 10 days after which it subsided as was indicated by the wounds beginning to heal	Keeps 2 groups of 3 mice in the same cage with a non-transparent wall in the middle
14	14.1	Terranova, M. L. Laviola, G. de Acetis, L. and Alleva, E.	Journal of Comparative Psychology (Washington, D.C. : 1983)	1998	A description of the ontogeny of mouse agonistic behavior	In house, originally from Charles River Italia, 1-22050 Calco, Italy	CD-1	20	Groups formed at weaning PND 21, social encounter every 3rd day from PND 23 to 47	Male	2	Siblings	Grups formed at weaning	Open cage: 33 X 13 X 14-cm	Not mentioned	Not mentioned	Novel arena social encounter				Yes	Age	Within	No	Increased aggression with age from PND 23 to 35	For the aggressive items of agonistic behavior, attacks were nearly absent on the first postweaning age tested (i.e., PND 23; see Figure 1). Thereafter, attack frequency increased until a peak was reached on PND 35, to maintain a constant level during the remaining age periods tested	In the present study of interacting dyads of mice of an outbred Swiss CD-I strain, agonistic interactions were almost totally absent from the behavioral repertoire expressed early in development (i.e., during the encounters of PNDs 23 and 26). Thereafter, the frequency of these behaviors progressively increased with age, until a conspicuous level was reached around PND 35 and maintained until the…
15	15.1	Clipperton-Allen, Amy E. Ingrao, Joelle C. Ruggiero, Laura Batista, Lucas Ovari, Jelena Hammermueller, Jutta Armstrong, John N. Bienzle, Dorothee Choleris, Elena and Turner, Patricia V.	Journal of the American Association for Laboratory Animal Science : JAALAS	2015	Long-Term Provision of Environmental Resources Alters Behavior but not Physiology or Neuroanatomy of Male and Female BALB/c and C57BL/6 Mice	Charles River Laboratories (St Constant, Quebec, Canada)	BALB/cAnNCrl and	40	Purchased at 5 wk of age, grouped and then transfered to experimental housing after 1 week, behavioural study performed in week 3, 7, 11, 15 and 19 of experimental housing	Male	5	Non-sibling	Purchased at 5 weeks, grouped 5 by 5 for 1 week in same sex groups for acclimatization then the groups were transfered to experimental housing	Open cage: Cage size for this study was 1098 cm2, which provided 213 cm2 per mouse	Once weekly cages were changed, amber tubes were autoclaved, and new squares of cotton nesting material were provided. New wood wool was provided every 3 wk during cage changing, to minimize weekly pheromone disruption.	Stadard: contact hard-wood chip bedding only; OR enriched:contact hardwood chip bedding, cotton nesting material (Nestlet), a clear amber tube and aspen wood wool, also a food reward in the form of a single piece of toasted oat cereal was offered individually to each mouse in the enriched housing condition 3 times weekly.	Home cage behaviour				Yes	Enrichment	Between	N/a	Decreased aggression in enriched environment	A resource-supplemented environment reduced dominant agonistic behaviors in both BALB/c and C57BL/6 male mice. Other studies have demonstrated increased agonistic interactions in male mice that were given highly valued but limited resources, such as running Wheels.31,44 In the current study, items were provided in sufficient quantity to be used by all animals in a group, such that no or minimal r…	No mice in either housing paradigm required separation from cagemates because of aggression. Agonistic behaviors were noted in one cage of standard-housed male BALB/c mouse during month 1, in 3 cages of standard-housed male C57BL/6 mice during month 3, in 2 resource-supplemented cages of male C57BL/6 mice during month 1. None of these findings required separation of animals. Minor bite wounds and…
15	15.2	Clipperton-Allen, Amy E. Ingrao, Joelle C. Ruggiero, Laura Batista, Lucas Ovari, Jelena Hammermueller, Jutta Armstrong, John N. Bienzle, Dorothee Choleris, Elena and Turner, Patricia V.	Journal of the American Association for Laboratory Animal Science : JAALAS	2015	Long-Term Provision of Environmental Resources Alters Behavior but not Physiology or Neuroanatomy of Male and Female BALB/c and C57BL/6 Mice	Charles River Laboratories (St Constant, Quebec, Canada)	C57BL/6NCrl	40		Male	5	Non-sibling	Purchased at 5 weeks, grouped 5 by 5 for 1 week in same sex groups for acclimatization then the groups were transfered to experimental housing	Open cage: Cage size for this study was 1098 cm2, which provided 213 cm2 per mouse	Once weekly cages were changed, amber tubes were autoclaved, and new squares of cotton nesting material were provided. New wood wool was provided every 3 wk during cage changing, to minimize weekly pheromone disruption.	Stadard: contact hard-wood chip bedding only; OR enriched:contact hardwood chip bedding, cotton nesting material (Nestlet), a clear amber tube and aspen wood wool, also a food reward in the form of a single piece of toasted oat cereal was offered individually to each mouse in the enriched housing condition 3 times weekly.	Home cage behaviour				Yes	Enrichment	Between	N/a	Decreased aggression in enriched environment	A resource-supplemented environment reduced dominant agonistic behaviors in both BALB/c and C57BL/6 male mice. Other studies have demonstrated increased agonistic interactions in male mice that were given highly valued but limited resources, such as running Wheels.31,44 In the current study, items were provided in sufficient quantity to be used by all animals in a group, such that no or minimal r…	No mice in either housing paradigm required separation from cagemates because of aggression. Agonistic behaviors were noted in one cage of standard-housed male BALB/c mouse during month 1, in 3 cages of standard-housed male C57BL/6 mice during month 3, in 2 resource-supplemented cages of male C57BL/6 mice during month 1. None of these findings required separation of animals. Minor bite wounds and…
15	15.3	Clipperton-Allen, Amy E. Ingrao, Joelle C. Ruggiero, Laura Batista, Lucas Ovari, Jelena Hammermueller, Jutta Armstrong, John N. Bienzle, Dorothee Choleris, Elena and Turner, Patricia V.	Journal of the American Association for Laboratory Animal Science : JAALAS	2015	Long-Term Provision of Environmental Resources Alters Behavior but not Physiology or Neuroanatomy of Male and Female BALB/c and C57BL/6 Mice	Charles River Laboratories (St Constant, Quebec, Canada)	BALB/cAnNCrl and C57BL/6NCrl	80		Male	5	Non-sibling	Purchased at 5 weeks, grouped 5 by 5 for 1 week in same sex groups for acclimatization then the groups were transfered to experimental housing	Open cage: Cage size for this study was 1098 cm2, which provided 213 cm2 per mouse	Once weekly cages were changed, amber tubes were autoclaved, and new squares of cotton nesting material were provided. New wood wool was provided every 3 wk during cage changing, to minimize weekly pheromone disruption.	Stadard: contact hard-wood chip bedding only; OR enriched:contact hardwood chip bedding, cotton nesting material (Nestlet), a clear amber tube and aspen wood wool, also a food reward in the form of a single piece of toasted oat cereal was offered individually to each mouse in the enriched housing condition 3 times weekly.	Home cage behaviour				Yes	Strain	Between	N/a	No difference	A resource-supplemented environment reduced dominant agonistic behaviors in both BALB/c and C57BL/6 male mice. Other studies have demonstrated increased agonistic interactions in male mice that were given highly valued but limited resources, such as running Wheels.31,44 In the current study, items were provided in sufficient quantity to be used by all animals in a group, such that no or minimal r…	No mice in either housing paradigm required separation from cagemates because of aggression. Agonistic behaviors were noted in one cage of standard-housed male BALB/c mouse during month 1, in 3 cages of standard-housed male C57BL/6 mice during month 3, in 2 resource-supplemented cages of male C57BL/6 mice during month 1. None of these findings required separation of animals. Minor bite wounds and…
16	16.1	Gray, S. and Hurst, J. L.	Animal Behaviour	1995	THE EFFECTS OF CAGE CLEANING ON AGGRESSION WITHIN GROUPS OF MALE LABORATORY MICE	Bantin and Kingman Laboratories, Hull, U.K.	CFLP	50	Obtained at 80 days of age	Male	5	Non-sibling	Obtained at 80 days of age, housed 5 by 5 for 10 days	Open cage: 44 x 26 x 12 cm	Treatment - 9 different	Sawdust, block (?)	Home cage behaviour after cage cleaning				Yes	Cage cleaning - 9 different tests see paper	Within	Yes	Decreased aggression with complete cage cleaning	Handling the mice and replacing them back in the home cage increased aggression. Mice replaced in uncleaned home cages were significantly more aggressive than those transferred to clean cages. Providing clean top grill and water bottle resulted in the greatest reductin in aggression compared to behviour in their uncleaned home cage. Replacing soiled substrate with clean did not reduce aggression,…	Authors points out that the aggression measured in this study was a response to normal husbandry procedures and thus likely to reflect that experienced regularly by caged groups of male mice. The CFLP strain was chosen since they show intermediate aggression levels compared to other strains. Our findings have important implications for the common practice of partial cage cleaning in which only th…
17	17.1	Kaliste, Eila K., Mering, Satu M. and Huuskonen, Hannele K.	Comparative Medicine	2006	Environmental modification and agonistic behavior in NIH/S male mice: nesting material enhances fighting but shelters prevent it	National Public Health Institute (Kuopio, Finland)	NIH/S	28 enl. tabell 3 16 kontroll och 12 enriched	Experimental housing started at 5 weeks of age and continued for 8 weeks, GI and RI tests performed at 12 weeks	Male	4	Non-sibling	Housed with littermates from weaning until 5 wk of age then allocated randomly to groups for the experiment	Open cage: 42 x 25 x 15 cm	Once weekly	Control: bedding material (aspen bedding?); Enrichment 1: aspen wood-wool as nesting material; Enrichment 2: nesting material and a transparent, plastic box; Enrichment 3: nesting material and a tube	Wound count	Group intruder test	Resident intruder test		Yes	Enrichment	Between	N/a	Increased aggression cages with only nesting material (aspen wood wool)	Nesting material in the absence of other modifications clearly enhanced fighting in groups of mice Wounding: In general, aggressiveness between cagemates remained low (Figure 2). The exception was the nest group, in which every cage contained wounded mice. By the end of the study, 7 of the 9 (78%) wounded animals were from the nest group. 2 experimental groups had to be euthanized 2 wk after the …	The reactions of animals to cage modifications are known to depend on strain (several ref) The outbred NIH/S strain, originating from the Swiss mouse, is very aggressive (ref). With mouse strains that are known to be aggressive, however, the suitability of enrichment should be carefully evaluated and different solutions should be considered. In our study, provision of a tube or box in addition to…
17	17.2	Kaliste, Eila K., Mering, Satu M. and Huuskonen, Hannele K.	Comparative Medicine	2006	Environmental modification and agonistic behavior in NIH/S male mice: nesting material enhances fighting but shelters prevent it	National Public Health Institute (Kuopio, Finland)	NIH/S	32 enl. tabell 3 16 kontroll och 16 enriched	Experimental housing started at 5 weeks of age and continued for 8 weeks, GI and RI tests performed at 12 weeks	Male	4	Non-sibling	Housed with littermates from weaning until 5 wk of age then allocated randomly to groups for the experiment	Open cage: 42 x 25 x 15 cm	Once weekly	Control: bedding material (aspen bedding?); Enrichment 1: aspen wood-wool as nesting material; Enrichment 2: nesting material and a transparent, plastic box; Enrichment 3: nesting material and a tube	Wound count	Group intruder test	Resident intruder test		Yes	Enrichment	Between	N/a	Increased aggression in enriched cages (nest+box) based on group intruder test	Group intruder test: The enrichment items seemed to induce aggressiveness towards a strange intruder. A statistically significant difference in GI test performance occurred only between the nest-and-box and control groups where there was fighting in all 4 cages in the nest + box group. Control animals did not show any aggressiveness toward an intruder or each other.	The reactions of animals to cage modifications are known to depend on strain (several ref) The outbred NIH/S strain, originating from the Swiss mouse, is very aggressive (ref). With mouse strains that are known to be aggressive, however, the suitability of enrichment should be carefully evaluated and different solutions should be considered. In our study, provision of a tube or box in addition to…
17	17.3	Kaliste, Eila K., Mering, Satu M. and Huuskonen, Hannele K.	Comparative Medicine	2006	Environmental modification and agonistic behavior in NIH/S male mice: nesting material enhances fighting but shelters prevent it	National Public Health Institute (Kuopio, Finland)	NIH/S	28 enl. tabell 3 16 kontroll och 12 enriched	Experimental housing started at 5 weeks of age and continued for 8 weeks, GI and RI tests performed at 12 weeks	Male	4	Non-sibling	Housed with littermates from weaning until 5 wk of age then allocated randomly to groups for the experiment	Open cage: 42 x 25 x 15 cm	Once weekly	Control: bedding material (aspen bedding?); Enrichment 1: aspen wood-wool as nesting material; Enrichment 2: nesting material and a transparent, plastic box; Enrichment 3: nesting material and a tube	Wound count	Group intruder test	Resident intruder test		Yes	Enrichment	Between	N/a	No difference	There is no significant differences to be found in the paper for nest+tube. The authors says that there is increased aggressiveness in RI and GI tests in the enriched groups but nothing is beeing pointed out as significant for the nest+tube condition.	The reactions of animals to cage modifications are known to depend on strain (several ref) The outbred NIH/S strain, originating from the Swiss mouse, is very aggressive (ref). With mouse strains that are known to be aggressive, however, the suitability of enrichment should be carefully evaluated and different solutions should be considered. In our study, provision of a tube or box in addition to…
18	18.1	Van der Meer, E. Van Loo, P. L. P., and Baumans, V.	Laboratory Animals	2004	Short-term effects of a disturbed light-dark cycle and environmental enrichment on aggression and stress-related parameters in male mice	Charles River	BALB/cAnNCrlBR	60	Purchased at 6 weeks, experiments performed at week 7 and 9	Male	3	Non-sibling	Obtained at 6 weeks at arrival housed 3 by 3	Open cage: 375 cm2	Once weekly. For enriched cages, the nesting material was transferred from the dirty cage into the clean cage, as transfer of nesting material has been shown to reduce aggression (Van Loo et al. 2000). Half of a new tissue was added to compensate for loss due to shredding or eating.	Standard: sawdust; Enriched: nesting material (two Kleenex tissues)	Home cage behaviour after cage cleaning				Yes	Enrichment	Between	N/a	No effect on aggression	No effects of enriched housing on agonistic behaviour were found
18	18.2	Van der Meer, E. Van Loo, P. L. P., and Baumans, V.	Laboratory Animals	2004	Short-term effects of a disturbed light-dark cycle and environmental enrichment on aggression and stress-related parameters in male mice	Charles River	BALB/cAnNCrlBR	60	Purchased at 6 weeks, experiments performed at week 7 and 9	Male	3	Non-sibling	Obtained at 6 weeks at arrival housed 3 by 3	Open cage: 375 cm2	Once weekly. For enriched cages, the nesting material was transferred from the dirty cage into the clean cage, as transfer of nesting material has been shown to reduce aggression (Van Loo et al. 2000). Half of a new tissue was added to compensate for loss due to shredding or eating.	Standard: sawdust; Enriched: nesting material (two Kleenex tissues)	Home cage behaviour after cage cleaning				Yes	Lightning paradigm shift (half of the mice kept with light always on for the 1st week of the experiment then 12:12. the other half kept with 12:12 all the time)	Between	N/a	Increased aggression with disturbed lightning	Although not significant, mice subjected to disturbed lighting showed a two-fold higher frequency of agonistic encounters than did control mice. In the first test week, mice subjected to disturbed lighting showed a significantly shorter agonistic latency than did control mice. This difference had disappeared when in the second test week when all mice experienced 12:12h lighting.
18	18.3	Van der Meer, E. Van Loo, P. L. P., and Baumans, V.	Laboratory Animals	2004	Short-term effects of a disturbed light-dark cycle and environmental enrichment on aggression and stress-related parameters in male mice	Charles River	BALB/cAnNCrlBR	60	Purchased at 6 weeks, experiments performed at week 7 and 9	Male	3	Non-sibling	Obtained at 6 weeks at arrival housed 3 by 3	Open cage: 375 cm2	Once weekly. For enriched cages, the nesting material was transferred from the dirty cage into the clean cage, as transfer of nesting material has been shown to reduce aggression (Van Loo et al. 2000). Half of a new tissue was added to compensate for loss due to shredding or eating.	Standard: sawdust; Enriched: nesting material (two Kleenex tissues)	Home cage behaviour after cage cleaning				Yes	Age	Within	No	Decreased aggression with age, comparing week 7 and 9	The frequency of agonistic encounters decreased by 61% between the first and second test week
19	19.1	Van Loo, P. L. P. Van der Meer, E. Kruitwagen, Cljj Koolhaas, J. M. Van Zutphen, L. F. M. and Baumans, V.	Aggressive Behavior	2003	Strain-specific aggressive behavior of male mice submitted to different husbandry procedures	Not mentioned but says "at arrival" so it sounds like there should be a breeder and not in house	BALB/cAnNCrlBR (BALB/c)	60	6 weeks old at arrival and into experimental housing. Behaviour studied at 9, 12, 15, 18 and 21 weeks of age	Male	3	Non-sibling	6 weeks old at arrival housed 3 by 3 for the study	Open cage: 375 cm2	Once weekly. For enriched cages, the nesting material was transferred from the dirty cage into the clean cage, and half of a new tissue was added to compensate for loss due to shredding or eating.	Standard: sawdust; Enriched: nesting material (two Kleenex tissues)	Home cage behaviour after cage cleaning	Wound count			Yes	Enrichment	Between	N/a	No effect on aggression	Home cage behaviour: No effects of housing condition on any of the postcleaning behavioral parameters could be established. Wound count: No effect of housing condition was found. For CD-1 mice, wound count did not seem to be a good indication of level of aggressiveness: only 4 of 20 CD-1 groups contained wounded animals.	The provision and transfer of nesting material neither reduced nor increased the level of intermale aggression in this study. This is contrary to results of previously performed studies by Van Loo et al. [2000, 2002] in which both the transfer of used nesting material and the provision of new nesting material clearly reduced the level of aggression. None of the BALB/c or CD-1 groups needed to be …
19	19.2	Van Loo, P. L. P. Van der Meer, E. Kruitwagen, Cljj Koolhaas, J. M. Van Zutphen, L. F. M. and Baumans, V.	Aggressive Behavior	2003	Strain-specific aggressive behavior of male mice submitted to different husbandry procedures	Not mentioned but says "at arrival" so it sounds like there should be a breeder and not in house	BALB/cAnNCrlBR (BALB/c)	60	6 weeks old at arrival and into experimental housing. Behaviour studied at 22 weeks of age	Male	3	Non-sibling	6 weeks old at arrival housed 3 by 3 for the study	Open cage: 375 cm2	Once weekly. For enriched cages, the nesting material was transferred from the dirty cage into the clean cage, and half of a new tissue was added to compensate for loss due to shredding or eating.	Treatment: House or tube added at week 22 in connection to cage cleaning	Home cage behaviour after cage cleaning				Yes	Enrichment (see interior)	Between	N/a	No effect on aggression	No significant differences were found between control groups and groups provided with either SSDR or PVC enrichment for any of the behavioral parameters measured.
19	19.3	Van Loo, P. L. P. Van der Meer, E. Kruitwagen, Cljj Koolhaas, J. M. Van Zutphen, L. F. M. and Baumans, V.	Aggressive Behavior	2003	Strain-specific aggressive behavior of male mice submitted to different husbandry procedures	Not mentioned but says "at arrival" so it sounds like there should be a breeder and not in house	BALB/cAnNCrlBR (BALB/c)	60	6 weeks old at arrival and into experimental housing. Behaviour studied at 9, 12, 15, 18 and 21 weeks of age	Male	3	Non-sibling	6 weeks old at arrival housed 3 by 3 for the study	Open cage: 375 cm2	Once weekly. For enriched cages, the nesting material was transferred from the dirty cage into the clean cage, and half of a new tissue was added to compensate for loss due to shredding or eating.	Standard: sawdust; Enriched: nesting material (two Kleenex tissues)	Home cage behaviour after cage cleaning					Age	Within	No	Increased aggression with increasing age after week 15 but before this a small decrease from week 9 to 12.	After a minor decrease in aggression at the start of the experiment, intermale aggression increased with age. In both strains, frequency and duration of agonistic encounters decreased from age 9 to 12 weeks, after which it increased (Fig. 1, top, only frequency shown). Number and duration of escalations in CD-1 mice followed the same time pattern, while in BALB/c mice, both were near zero and inc…
19	19.4	Van Loo, P. L. P. Van der Meer, E. Kruitwagen, Cljj Koolhaas, J. M. Van Zutphen, L. F. M. and Baumans, V.	Aggressive Behavior	2003	Strain-specific aggressive behavior of male mice submitted to different husbandry procedures	Not mentioned but says "at arrival" so it sounds like there should be a breeder and not in house	CRL:CD-1(ICR)BR (CD-1)	60	6 weeks old at arrival and into experimental housing. Behaviour studied at 9, 12, 15, 18 and 21 weeks of age	Male	3	Non-sibling	6 weeks old at arrival housed 3 by 3 for the study	Open cage: 375 cm2	Once weekly. For enriched cages, the nesting material was transferred from the dirty cage into the clean cage, and half of a new tissue was added to compensate for loss due to shredding or eating.	Standard: sawdust; Enriched: nesting material (two Kleenex tissues)	Home cage behaviour after cage cleaning	Wound count			Yes	Enrichment	Between	N/a	No effect on aggression	Home cage behaviour: No effects of housing condition on any of the postcleaning behavioral parameters could be established. Wound count: No effect of housing condition was found. For CD-1 mice, wound count did not seem to be a good indication of level of aggressiveness: only 4 of 20 CD-1 groups contained wounded animals.	The provision and transfer of nesting material neither reduced nor increased the level of intermale aggression in this study. This is contrary to results of previously performed studies by Van Loo et al. [2000, 2002] in which both the transfer of used nesting material and the provision of new nesting material clearly reduced the level of aggression. None of the BALB/c or CD-1 groups needed to be …
19	19.5	Van Loo, P. L. P. Van der Meer, E. Kruitwagen, Cljj Koolhaas, J. M. Van Zutphen, L. F. M. and Baumans, V.	Aggressive Behavior	2003	Strain-specific aggressive behavior of male mice submitted to different husbandry procedures	Not mentioned but says "at arrival" so it sounds like there should be a breeder and not in house	CRL:CD-1(ICR)BR (CD-1)	60	6 weeks old at arrival and into experimental housing. Behaviour studied at 22 weeks of age	Male	3	Non-sibling	6 weeks old at arrival housed 3 by 3 for the study	Open cage: 375 cm2	Once weekly. For enriched cages, the nesting material was transferred from the dirty cage into the clean cage, and half of a new tissue was added to compensate for loss due to shredding or eating.	Treatment: House or tube added at week 22 in connection to cage cleaning	Home cage behaviour after cage cleaning				Yes	Enrichment (see interior)	Between	N/a	No effect on aggression	No significant differences were found between control groups and groups provided with either SSDR or PVC enrichment for any of the behavioral parameters measured.
19	19.6	Van Loo, P. L. P. Van der Meer, E. Kruitwagen, Cljj Koolhaas, J. M. Van Zutphen, L. F. M. and Baumans, V.	Aggressive Behavior	2003	Strain-specific aggressive behavior of male mice submitted to different husbandry procedures	Not mentioned but says "at arrival" so it sounds like there should be a breeder and not in house	CRL:CD-1(ICR)BR (CD-1)	60	6 weeks old at arrival and into experimental housing. Behaviour studied at 9, 12, 15, 18 and 21 weeks of age	Male	3	Non-sibling	6 weeks old at arrival housed 3 by 3 for the study	Open cage: 375 cm2	Once weekly. For enriched cages, the nesting material was transferred from the dirty cage into the clean cage, and half of a new tissue was added to compensate for loss due to shredding or eating.	Standard: sawdust; Enriched: nesting material (two Kleenex tissues)	Home cage behaviour after cage cleaning					Age	Within	No	Increased aggression with increasing age after week 15 but before this a small decrease from week 9 to 12.	After a minor decrease in aggression at the start of the experiment, intermale aggression increased with age. In both strains, frequency and duration of agonistic encounters decreased from age 9 to 12 weeks, after which it increased (Fig. 1, top, only frequency shown). Number and duration of escalations in CD-1 mice followed the same time pattern, while in BALB/c mice, both were near zero and inc…
19	19.7	Van Loo, P. L. P. Van der Meer, E. Kruitwagen, Cljj Koolhaas, J. M. Van Zutphen, L. F. M. and Baumans, V.	Aggressive Behavior	2003	Strain-specific aggressive behavior of male mice submitted to different husbandry procedures	Not mentioned but says "at arrival" so it sounds like there should be a breeder and not in house	BALB/cAnNCrlBR (BALB/c) AND CRL:CD-1(ICR)BR (CD-1)	120	6 weeks old at arrival and into experimental housing. Behaviour studied at 9, 12, 15, 18 and 21 weeks of age	Male	3	Non-sibling	6 weeks old at arrival housed 3 by 3 for the study	Open cage: 375 cm2	Once weekly. For enriched cages, the nesting material was transferred from the dirty cage into the clean cage, and half of a new tissue was added to compensate for loss due to shredding or eating.	Standard: sawdust; Enriched: nesting material (two Kleenex tissues)	Home cage behaviour after cage cleaning	Wound count			Yes	Strain	Between	N/a	More fighting in CD-1	Home cage behaviour: CD-1 mice showed more agonistic behavior than BALB/c mice after cage cleaning. Fights were observed in only 7 BALB/c and 10 CD-1 groups. For BALB/c mice, the total number of fights observed during the whole experiment was six for the standard-housed. Wound count: the number of animals injured by fighting was higher in BALB/c mice compared with CD-1 mice, although the few CD-1…
20	20.1	Collins, R. A.	Behavior Genetics	1970	Aggression in mice selectively bred for brain weight	In house	Selection lines for high and low brain weigh and an unselected control line randomly mated from parents of average brain weight, does not specify the strain	60 (20 from each line plus 20 control)	Grouped at weaning (25 +/- 3.5 days) and kept at experimental housing scored for scaring after 30 days	Male	10	Non-sibling	Grouped at weaning (25 +/- 3.5 days) andtransfered to experimental housing	Open cage: large (16 x 16 x 16 inches) hardware cloth cages	Not mentioned	Ball, plexiglas tubing, T-shaped tunnel maze, L-shaped tunnel maze, climbing tree, and a rotating wheel) which were changed daily.	Wound count after 30 days of experimental housing				Yes	selection for brain weight	Between	N/a	Increased aggression with decreased brain weight	Nearly all of the mice from the low line were severely scarred; minimal or no scarring was observed for most of the control line animals, and the high line animals evidenced their non-aggressiveness with 18 or 20 having no visible scars or scratches. This dramatic negative association between brain weight and aggression contributes merely one datum to the study of correlated phenotypes but may pr…	The animals, in groups of five, were also provided a 30 minute daily exposure to a Hebb-Williams maze (Hebb and Williams, 1946) with a varying pattern of barriers.
21	21.1	Terranova, M. L. Laviola, G. and Alleva, E.	Developmental psychobiology	1993	Ontogeny of amicable social behavior in the mouse: gender differences and ongoing isolation outcomes	In house, originally from Charles River Italia, 1-22050 Calco, Italy	CD-1	10? States that "Each experimental group was therefore represented by 10 pairs [social encounters]" but has 40 male mice that are divided on individual or pair housing and doesn´t state how many pairs there are, so maybe the number of pairhoused males are 20?	Grouped at weaning, Day 21, from day 23-47, each mouse underwent a 30-min social encounter with a nonsibling mouse of the same sex and group every third day	Male	2	Siblings	Grouped at weaning and kept at experimental housing	Open cage: 33 X 13 x 14 cm	Not mentioned	Not mentioned for experimental housing only for breeding: sawdust?	Novel arena social encounter				Yes	Age	Within	No	Increased aggression with age from day 23 to 35	Aggressive behavior, as measured by duration of Fighting episodes started around Day 23 and increased untill day 35 for pair housed males, remaining on the higher level thereafter
22	22.1	Giles, J. M. Whitaker, J. W. Moy, S. S. and Fletcher, C. A.	Journal of the American Association for Laboratory Animal Science	2018	Effect of environmental enrichment on aggression in BALB/cJ and BALB/cByJ mice monitored by using an automated system	Jackson Laboratories, Bar Harbor, ME	BALB/cJ	90. For the home cage video recordings only 27.	3 wk at arrival then housed 3 by 3, aggression measured from 4 weeks	Male	3	Non-sibling	3 wk at arrival, housed in experimental groups, setteling in for 1 week then start of aggression tests which continued for 6 wk	IVC: 77.66 in2	Every other week, mice were either given a new cotton square or a clean, sanitized structural item according to their assigned enrichment condition.	1) a cotton square used for nesting material; 2) a shelter	Home cage behaviour after cage cleaning - no transfer of nesting material	Removal and reintroduction of cage mate	Home cage behaviour video recordings 2min/h for 24h		Yes	Enrichment	Between	N/a	No effect of enrichment in the BALB/cJ.	High levels of aggressive interactions occurred during the removal-and-reintroduction test (Figure 4). Two-way ANOVA revealed a highly significant strain × housing condition interaction (F2,54= 6.29, P = 0.0035). Further analyses indicated that, in the BALB/cJ mice, enrichment did not have any effects on the amount of aggression. (However, in the BALB/cByJ strain, mice housed with a mezzanine had…	Interestingly, high levels of aggressive interactions occurred after the removal-and-reintroduction test. In a laboratory setting, extracting a single mouse for experimental purposes might interrupt conformity between submissive and dominant mice, even though scent-marking and other aspects of the primary enclosure remain undisturbed. Although the housing conditions were ineffective at mitigating…
22	22.2	Giles, J. M. Whitaker, J. W. Moy, S. S. and Fletcher, C. A.	Journal of the American Association for Laboratory Animal Science	2018	Effect of environmental enrichment on aggression in BALB/cJ and BALB/cByJ mice monitored by using an automated system	Jackson Laboratories, Bar Harbor, ME	BALB/cByJ	90. For the home cage video recordings only 27.	3 wk at arrival then housed 3 by 3, aggression measured from 4 weeks	Male	3	Non-sibling	3 wk at arrival, housed in experimental groups, setteling in for 1 week then start of aggression tests which continued for 6 wk	IVC: 77.66 in2	Every other week, mice were either given a new cotton square or a clean, sanitized structural item according to their assigned enrichment condition.	1) a cotton square used for nesting material; 3) a mezzanine, an autoclavable, polysulfone ledge mounted from the wire bar that provided an additional level or extra floor space. Both structural forms of enrichment provided both entrance and exit points.	Home cage behaviour after cage cleaning - no transfer of nesting material	Removal and reintroduction of cage mate	Home cage behaviour video recordings 2min/h for 24h		Yes	Enrichment	Between	N/a	Decreased aggression with mezzanine compared to cotton square in the BALB/cByJ.	However, in the BALB/cByJ strain, mice housed with a mezzanine had significantly (P < 0.05) less fighting than both the cotton square and shelter groups. (High levels of aggressive interactions occurred during the removal-and-reintroduction test (Figure 4). Two-way ANOVA revealed a highly significant strain × housing condition interaction (F2,54 = 6.29, P = 0.0035). Further analyses indicated tha…	Interestingly, high levels of aggressive interactions occurred after the removal-and-reintroduction test. In a laboratory setting, extracting a single mouse for experimental purposes might interrupt conformity between submissive and dominant mice, even though scent-marking and other aspects of the primary enclosure remain undisturbed. Although the housing conditions were ineffective at mitigating…
22	22.3	Giles, J. M. Whitaker, J. W. Moy, S. S. and Fletcher, C. A.	Journal of the American Association for Laboratory Animal Science	2018	Effect of environmental enrichment on aggression in BALB/cJ and BALB/cByJ mice monitored by using an automated system	Jackson Laboratories, Bar Harbor, ME	BALB/cJ and BALB/cByJ	180. For the home cage video recordings only 54.	3 wk at arrival then housed 3 by 3, aggression measured from 4 weeks	Male	3	Non-sibling	3 wk at arrival, housed in experimental groups, setteling in for 1 week then start of aggression tests which continued for 6 wk	IVC: 77.66 in2	Every other week, mice were either given a new cotton square or a clean, sanitized structural item according to their assigned enrichment condition.	1) a cotton square used for nesting material; 2) a shelter; or 3) a mezzanine, an autoclavable, polysulfone ledge mounted from the wire bar that provided an additional level or extra floor space. Both structural forms of enrichment provided both entrance and exit points.	Home cage behaviour after cage cleaning - no transfer of nesting material	Removal and reintroduction of cage mate	Home cage behaviour video recordings 2min/h for 24h	Wound observation once a week	Yes	Strain	Between	N/a	More aggression in BALB/ cJ strain than BALB/cByJ	Cage cleaning: BALB/cJ strain had significantly more aggressive encounters than BALB/cByJ after placement in a clean cage - no transfer of nesting material at cage change. Wounds: At 1 wk before the study concluded, one cage of BALB/cJ mice was euthanized due to severe wounds despite medical treatment; this cage of mice was the only one that required medical treatment. In addition, one mouse with…	High levels of aggressive interactions occurred during the removal-and-reintroduction test (Figure 4). Two-way ANOVA revealed a highly significant strain × housing condition interaction (F2,54= 6.29, P = 0.0035). Further analyses indicated that, in the BALB/cJ mice, enrichment did not have any effects on the amount of aggression. However, in the BALB/cByJ strain, mice housed with a mezzanine had …
22	22.4	Giles, J. M. Whitaker, J. W. Moy, S. S. and Fletcher, C. A.	Journal of the American Association for Laboratory Animal Science	2018	Effect of environmental enrichment on aggression in BALB/cJ and BALB/cByJ mice monitored by using an automated system	Jackson Laboratories, Bar Harbor, ME	BALB/cJ	90. For the home cage video recordings only 27.	3 wk at arrival then housed 3 by 3, aggression measured from 4 weeks	Male	3	Non-sibling	3 wk at arrival, housed in experimental groups, setteling in for 1 week then start of aggression tests which continued for 6 wk	IVC: 77.66 in2	Every other week, mice were either given a new cotton square or a clean, sanitized structural item according to their assigned enrichment condition.	1) a cotton square used for nesting material; or 3) a mezzanine, an autoclavable, polysulfone ledge mounted from the wire bar that provided an additional level or extra floor space. Both structural forms of enrichment provided both entrance and exit points.	Home cage behaviour after cage cleaning - no transfer of nesting material	Removal and reintroduction of cage mate	Home cage behaviour video recordings 2min/h for 24h		Yes	Enrichment	Between	N/a	No effect of enrichment in the BALB/cJ.	High levels of aggressive interactions occurred during the removal-and-reintroduction test (Figure 4). Two-way ANOVA revealed a highly significant strain × housing condition interaction (F2,54= 6.29, P = 0.0035). Further analyses indicated that, in the BALB/cJ mice, enrichment did not have any effects on the amount of aggression. (However, in the BALB/cByJ strain, mice housed with a mezzanine had…	Interestingly, high levels of aggressive interactions occurred after the removal-and-reintroduction test. In a laboratory setting, extracting a single mouse for experimental purposes might interrupt conformity between submissive and dominant mice, even though scent-marking and other aspects of the primary enclosure remain undisturbed. Although the housing conditions were ineffective at mitigating…
22	22.5	Giles, J. M. Whitaker, J. W. Moy, S. S. and Fletcher, C. A.	Journal of the American Association for Laboratory Animal Science	2018	Effect of environmental enrichment on aggression in BALB/cJ and BALB/cByJ mice monitored by using an automated system	Jackson Laboratories, Bar Harbor, ME	BALB/cJ	90. For the home cage video recordings only 27.	3 wk at arrival then housed 3 by 3, aggression measured from 4 weeks	Male	3	Non-sibling	3 wk at arrival, housed in experimental groups, setteling in for 1 week then start of aggression tests which continued for 6 wk	IVC: 77.66 in2	Every other week, mice were either given a new cotton square or a clean, sanitized structural item according to their assigned enrichment condition.	2) a shelter; or 3) a mezzanine, an autoclavable, polysulfone ledge mounted from the wire bar that provided an additional level or extra floor space. Both structural forms of enrichment provided both entrance and exit points.	Home cage behaviour after cage cleaning - no transfer of nesting material	Removal and reintroduction of cage mate	Home cage behaviour video recordings 2min/h for 24h		Yes	Enrichment	Between	N/a	No effect of enrichment in the BALB/cJ.	High levels of aggressive interactions occurred during the removal-and-reintroduction test (Figure 4). Two-way ANOVA revealed a highly significant strain × housing condition interaction (F2,54= 6.29, P = 0.0035). Further analyses indicated that, in the BALB/cJ mice, enrichment did not have any effects on the amount of aggression. (However, in the BALB/cByJ strain, mice housed with a mezzanine had…	Interestingly, high levels of aggressive interactions occurred after the removal-and-reintroduction test. In a laboratory setting, extracting a single mouse for experimental purposes might interrupt conformity between submissive and dominant mice, even though scent-marking and other aspects of the primary enclosure remain undisturbed. Although the housing conditions were ineffective at mitigating…
22	22.6	Giles, J. M. Whitaker, J. W. Moy, S. S. and Fletcher, C. A.	Journal of the American Association for Laboratory Animal Science	2018	Effect of environmental enrichment on aggression in BALB/cJ and BALB/cByJ mice monitored by using an automated system	Jackson Laboratories, Bar Harbor, ME	BALB/cByJ	90. For the home cage video recordings only 27.	3 wk at arrival then housed 3 by 3, aggression measured from 4 weeks	Male	3	Non-sibling	3 wk at arrival, housed in experimental groups, setteling in for 1 week then start of aggression tests which continued for 6 wk	IVC: 77.66 in2	Every other week, mice were either given a new cotton square or a clean, sanitized structural item according to their assigned enrichment condition.	2) a shelter; or 3) a mezzanine, an autoclavable, polysulfone ledge mounted from the wire bar that provided an additional level or extra floor space. Both structural forms of enrichment provided both entrance and exit points.	Home cage behaviour after cage cleaning - no transfer of nesting material	Removal and reintroduction of cage mate	Home cage behaviour video recordings 2min/h for 24h		Yes	Enrichment	Between	N/a	Decreased aggression with mezzanine compared to shelter in the BALB/cByJ.	However, in the BALB/cByJ strain, mice housed with a mezzanine had significantly (P < 0.05) less fighting than both the cotton square and shelter groups. (High levels of aggressive interactions occurred during the removal-and-reintroduction test (Figure 4). Two-way ANOVA revealed a highly significant strain × housing condition interaction (F2,54 = 6.29, P = 0.0035). Further analyses indicated tha…	Interestingly, high levels of aggressive interactions occurred after the removal-and-reintroduction test. In a laboratory setting, extracting a single mouse for experimental purposes might interrupt conformity between submissive and dominant mice, even though scent-marking and other aspects of the primary enclosure remain undisturbed. Although the housing conditions were ineffective at mitigating…
22	22.7	Giles, J. M. Whitaker, J. W. Moy, S. S. and Fletcher, C. A.	Journal of the American Association for Laboratory Animal Science	2018	Effect of environmental enrichment on aggression in BALB/cJ and BALB/cByJ mice monitored by using an automated system	Jackson Laboratories, Bar Harbor, ME	BALB/cByJ	90. For the home cage video recordings only 27.	3 wk at arrival then housed 3 by 3, aggression measured from 4 weeks	Male	3	Non-sibling	3 wk at arrival, housed in experimental groups, setteling in for 1 week then start of aggression tests which continued for 6 wk	IVC: 77.66 in2	Every other week, mice were either given a new cotton square or a clean, sanitized structural item according to their assigned enrichment condition.	1) a cotton square used for nesting material; 2) a shelter	Home cage behaviour after cage cleaning - no transfer of nesting material	Removal and reintroduction of cage mate	Home cage behaviour video recordings 2min/h for 24h		Yes	Enrichment	Between	N/a	No effect of aggression comparing cotton square and shelter in the BALB/cByJ.	However, in the BALB/cByJ strain, mice housed with a mezzanine had significantly (P < 0.05) less fighting than both the cotton square and shelter groups. (High levels of aggressive interactions occurred during the removal-and-reintroduction test (Figure 4). Two-way ANOVA revealed a highly significant strain × housing condition interaction (F2,54 = 6.29, P = 0.0035). Further analyses indicated tha…	Interestingly, high levels of aggressive interactions occurred after the removal-and-reintroduction test. In a laboratory setting, extracting a single mouse for experimental purposes might interrupt conformity between submissive and dominant mice, even though scent-marking and other aspects of the primary enclosure remain undisturbed. Although the housing conditions were ineffective at mitigating…
23	23.1	Eskola, S. and Kaliste-Korhonen, E.	Laboratory Animals	1999	Aspen wood-wool is preferred as a resting place, but does not affect intracage fighting of male BALB/c and C57BL/6J mice	National Laboratory Animal Center, Kuopio, Finland	BALB/c	72 BALB/c	Housed from weaning in groups of 5-9 males, test groups formed at 10 weeks of age, aggression scored by videotape directly after group formation and again 2 week later, group intruder experiment performed at the end of the experiment after 4 weeks of experimental housing	Male	6	Non-sibling	Housed from weaning in groups of 5-9 males, test groups formed at 10 weeks of age	Open cage: 42 x 25 x 15 cm	Once a week	Controll: bedding only, Enriched: Nesing material = Aspen wood woll	Home cage behaviour	Group intruder test	Wound count weekly (back only)		Yes	Age	Within	No	Increasing (slightly) aggression with increasing age from week 10 to 11 (?) based on wounding	Wounding: The number of animals with wounds in both strains increased slightly during the study. Home cage behaviour: The aggressive behaviour did not change with time.
23	23.2	Eskola, S. and Kaliste-Korhonen, E.	Laboratory Animals	1999	Aspen wood-wool is preferred as a resting place, but does not affect intracage fighting of male BALB/c and C57BL/6J mice	National Laboratory Animal Center, Kuopio, Finland	BALB/c	72 BALB/c	Housed from weaning in groups of 5-9 males, test groups formed at 10 weeks of age, aggression scored by videotape directly after group formation and again 2 week later, group intruder experiment performed at the end of the experiment after 4 weeks of experimental housing	Male	6	Non-sibling	Housed from weaning in groups of 5-9 males, test groups formed at 10 weeks of age	Open cage: 42 x 25 x 15 cm	Once a week	Controll: bedding only, Enriched: Nesing material = Aspen wood woll	Home cage behaviour	Group intruder test	Wound count weekly (back only)		Yes	Enrichment	Between	N/a	No effect on aggression	Wounding: The availability of nesting material had no effect on the number of wounded animals in either strain. Home cage behaviour: The number of aggressive contacts between cage mates was not affected by the presence of nesting material. Group intruder test: The number of attacks against a strange intruder did not differ significantly between the two mouse strains or between cages with or witho…	In our study, nesting material did not affect aggressive behaviour of mice, measured as the number of wounded animals, aggressive contacts between cage mates, or aggressive attacks against a strange intruder.
23	23.3	Eskola, S. and Kaliste-Korhonen, E.	Laboratory Animals	1999	Aspen wood-wool is preferred as a resting place, but does not affect intracage fighting of male BALB/c and C57BL/6J mice	National Laboratory Animal Center, Kuopio, Finland	BALB/c and C57BL/6J	108: 72 BALB/c and 36 C57BL/6J	Housed from weaning in groups of 5-9 males, test groups formed at 10 weeks of age, aggression scored by videotape directly after group formation and again 2 week later, group intruder experiment performed at the end of the experiment after 4 weeks of experimental housing	Male	6	Non-sibling	Housed from weaning in groups of 5-9 males, test groups formed at 10 weeks of age	Open cage: 42 x 25 x 15 cm	Once a week	Controll: bedding only, Enriched: Nesing material = Aspen wood woll	Home cage behaviour	Group intruder test	Wound count weekly (back only)		Yes	Strain	Between	N/a	More (slightly) aggression in C57BL/6J than BALB/c based on wounding	Wounding: Wounded animals were regularly found in all C57BL/6J cages, whereas occurrence and number of wounded animals varied more in BALB/c mice. The frequency of wounded animals was greater in C57BL/6J mice during the second and third weeks. Group intruder test: The number of attacks against a strange intruder did not differ significantly between the two mouse strains or between cages with or w…	In general, male mice in this study were not very aggressive. Fighting occurred in all cages of C57BL/6J mice. The strain differences in aggressive behaviour of mice are well known (Eleftheriou et a1. 1974, Festing 1979, Simon 1979, Mondragon et a1. 1987). However, depending on the test procedures, C57BL or BALB/c have both been reported to be more aggressive (Simon 1979). Based on wounds, C57BL/…
23	23.4	Eskola, S. and Kaliste-Korhonen, E.	Laboratory Animals	1999	Aspen wood-wool is preferred as a resting place, but does not affect intracage fighting of male BALB/c and C57BL/6J mice	National Laboratory Animal Center, Kuopio, Finland	C57BL/6J	36 C57BL/6J	Housed from weaning in groups of 5-9 males, test groups formed at 10 weeks of age, aggression scored by videotape directly after group formation and again 2 week later, group intruder experiment performed at the end of the experiment after 4 weeks of experimental housing	Male	6	Non-sibling	Housed from weaning in groups of 5-9 males, test groups formed at 10 weeks of age	Open cage: 42 x 25 x 15 cm	Once a week	Controll: bedding only, Enriched: Nesing material = Aspen wood woll	Home cage behaviour	Group intruder test	Wound count weekly (back only)		Yes	Age	Within	No	Increasing (slightly) aggression with increasing age from week 10 to 11 (?) based on wounding	Wounding: The number of animals with wounds in both strains increased slightly during the study. Home cage behaviour: The aggressive behaviour did not change with time.
23	23.5	Eskola, S. and Kaliste-Korhonen, E.	Laboratory Animals	1999	Aspen wood-wool is preferred as a resting place, but does not affect intracage fighting of male BALB/c and C57BL/6J mice	National Laboratory Animal Center, Kuopio, Finland	C57BL/6J	36 C57BL/6J	Housed from weaning in groups of 5-9 males, test groups formed at 10 weeks of age, aggression scored by videotape directly after group formation and again 2 week later, group intruder experiment performed at the end of the experiment after 4 weeks of experimental housing	Male	6	Non-sibling	Housed from weaning in groups of 5-9 males, test groups formed at 10 weeks of age	Open cage: 42 x 25 x 15 cm	Once a week	Controll: bedding only, Enriched: Nesing material = Aspen wood woll	Home cage behaviour	Group intruder test	Wound count weekly (back only)		Yes	Enrichment	Between	N/a	No effect on aggression	Wounding: The availability of nesting material had no effect on the number of wounded animals in either strain. Home cage behaviour: The number of aggressive contacts between cage mates was not affected by the presence of nesting material. Group intruder test: The number of attacks against a strange intruder did not differ significantly between the two mouse strains or between cages with or witho…	In our study, nesting material did not affect aggressive behaviour of mice, measured as the number of wounded animals, aggressive contacts between cage mates, or aggressive attacks against a strange intruder.
24	24.1	Koyama, S. and Kamimura, S.	Physiology & Behavior	2000	Influence of social dominance and female odor on the sperm activity of male mice	Saitama Experimental Animals Supply, Saitama	ddY	106	Housed in experimental cages from 5 to 15 weeks, group intruder test done from 8-10 weeks and from 12-15 weeks	Male	2	Non-sibling	Not mentioned except for experimental housing from 5 weeks of age	Open cage: 17 x 24 x 13 cm	No cage change during the experiment	Paper processed to soak up urine, the female bedding group also got some wooden chips from female cages	Group intruder test				Yes	Housing condition	Between	N/a	Increased aggression with precence of female mice close to the cage	Total time spent on aggression was significantly longer in With Female group compared to the 2 other groups	As subordinates showed few aggressions in intruder tests, only the results of dominant mice were compared.
25	25.1	Tallent, Bret R. Law, L. Matthew Rowe, Rachel K., and Lifshitz, Jonathan	Laboratory Animals	2018	Partial cage division significantly reduces aggressive behavior in male laboratory mice	Envigo, Inc., Indianapolis, IN	Balb/c	18	8 weeks old at arrival directly into experimental housing, home cage behaviour studied at day 1, 2 and 7 of experimental housing	Male	3	Non-sibling	To experimental housing on arrival from vendor	IVC: 14.7’’L x 9.2’’ W	Every other week (none during the course of evaluation)	Corn cob bedding, and a nestlet square. In the partition group also the cage divider.	Home cage behaviour videotaped on day 1, 2, and 7 of experimental housing				Yes	Enrichment - Housing condition: Standard cage OR cage with a divider giving a three burrow division	Between	N/a	Decreased aggression with cage partitions	Mice housed in divided cages had significantly fewer aggressive behavior events than mice housed in standard cages, in terms of daily combined number of events, events in the light cycle, and events in the dark cycle. There was an overall effect of day for aggressive behavior with significantly more daily combined events, light cycle events, and dark cycle events, on day 2 compared to day 1 and d…	This line was selected because they are commonly used and somewhat aggressive. Anecdotal findings of divided cages: In divided cages, mice spent time in all three burrows and the common area, at times alone and together. Spontaneously, single animals would move into an empty burrow without provocation. The nestlet was brought into a single burrow and formed into a nest, where the mice would sleep…
26	26.1	Lima, F. B. and Spinelli de Oliveira, E.	Behavioural Processes	2014	What is the impact of low testosterone levels on the anatomical and behavioral repertoire of long-term enriched housing of male mice?	In house	Swiss	21 sham operated (and 24 that has been castrated)	Grouped for the experimet at weaning day 21, then also castrated or sham and placed in experimental housing, maintained in this housing for 7 months. Behavioural tests performed when the mice were at least 3 months.	Male	3	Non-sibling	Grouped for experiment at weaning then also castrated or sham operated	Open cage: 49 cm × 34 cm × 16 cm	Once weekly	Standard: wood shavings; Enriched: two colorful plastic devices made of LEGO one inset and one scaffolding	Home cage behaviour	Group intruder test	Neutral arena - all 3 mice from the same group held separately for 2h then re-united in a novel cage		Yes	Enrichment	Between	N/a	Decreased aggression in enriched environment in the sham operated mice	Resident intruder test: Non-castrated enriched mice display significantly less attacks than non-castrated standard mice. Neutral arena - no difference based on fig. 3A. Our results indicate that the home cage behavior displayed by mice raised in EE is not different from that displayed by mice from standard cages. Routines in enriched cages might also be important to prevent negative side effects,…	Non-castrated mice has been sham operated. Did not include the part on castration which of course had an effect on aggression but to me did not seem relevant. Since aggression was one of the parameters we aimed to evaluate, this kind of EE was chosen because it is postulated to increase agonistic behavior. .
27	27.1	Nicholson, A. Malcolm, R. D. Russ, P. L. Cough, K. Touma, C. Palme, R., and Wiles, M. V.	Journal of the American Association for Laboratory Animal Science	2009	The response of C57BL/6J and BALB/cJ mice to increased housing density	The Jackson Laboratory, Bar Harbor, ME	C57BL/6J and	108	Mice were housed in single-sex groups from weaning, at 3 wk for BALB and 4 wk for B6, and maintained in these groups for the duration of the experiments, 17 and 16 wk respectively. Wounding studied at cage change, every other week, and at the end of the experiment.	Male	4 OR 6 OR 8	Non-sibling	Mice were housed in single-sex groups from weaning, at 3 wk for BALB and 4 wk for B6, and maintained in these groups for the duration of the experiments	IVC: 2 adjacent pens, with each pen being 30.8 cm × 15.4 cm × 14.0 cm and a floor area of 333.5 cm2	Every other week	White pine shavings	Wound count at cage change = every other week and at the end of the study				Yes	Density: 83.2, 55.5, and 41.9 cm2 per mouse	Between	N/a	No effect on aggression	B6 mice did not show gross evidence of fight wounds during or at the end of the study. However fighting among BALB males was evident at all densities during the study, with 25%, 8%, and 10% of male mice housed at 4, 6, and 8 per pen, respectively, having obvious signs of fight wounds at study end.	Fighting among male mice, with obvious wounding, is the most common manifestation of aggression, but was infrequent in the present study, even in the more aggressive male BALB mice. Our results suggest that evidence of fighting is an unreliable effect of increasing housing density, both in fighting-prone as well as non-fighting-prone mice, at least as represented by the BALB and B6 strains
27	27.2	Nicholson, A. Malcolm, R. D. Russ, P. L. Cough, K. Touma, C. Palme, R., and Wiles, M. V.	Journal of the American Association for Laboratory Animal Science	2009	The response of C57BL/6J and BALB/cJ mice to increased housing density	The Jackson Laboratory, Bar Harbor, ME	BALB/cJ	108	Mice were housed in single-sex groups from weaning, at 3 wk for BALB and 4 wk for B6, and maintained in these groups for the duration of the experiments, 17 and 16 wk respectively. Wounding studied at cage change, every other week, and at the end of the experiment.	Male	4 OR 6 OR 8	Non-sibling	Mice were housed in single-sex groups from weaning, at 3 wk for BALB and 4 wk for B6, and maintained in these groups for the duration of the experiments	IVC: 2 adjacent pens, with each pen being 30.8 cm × 15.4 cm × 14.0 cm and a floor area of 333.5 cm3	Every other week	White pine shavings	Wound count at cage change = every other week and at the end of the study				Yes	Density: 83.2, 55.5, and 41.9 cm2 per mouse	Between	N/a	No effect on aggression	B6 mice did not show gross evidence of fight wounds during or at the end of the study. However fighting among BALB males was evident at all densities during the study, with 25%, 8%, and 10% of male mice housed at 4, 6, and 8 per pen, respectively, having obvious signs of fight wounds at study end.	Authors state: Because evidence of fighting by male BALB mice was distributed relatively evenly across density groups, fighting was unlikely to be a major factor in the weight differences observed. And: Fighting among male mice, with obvious wounding, is the most common manifestation of aggression, but was infrequent in the present study, even in the more aggressive male BALB mice. And, not targe…
27	27.3	Nicholson, A. Malcolm, R. D. Russ, P. L. Cough, K. Touma, C. Palme, R., and Wiles, M. V.	Journal of the American Association for Laboratory Animal Science	2009	The response of C57BL/6J and BALB/cJ mice to increased housing density	The Jackson Laboratory, Bar Harbor, ME	C57BL/6J and BALB/cJ	216 half from each strain	Mice were housed in single-sex groups from weaning, at 3 wk for BALB and 4 wk for B6, and maintained in these groups for the duration of the experiments, 17 and 16 wk respectively. Wounding studied at cage change, every other week, and at the end of the experiment.	Male	4 OR 6 OR 8	Non-sibling	Mice were housed in single-sex groups from weaning, at 3 wk for BALB and 4 wk for B6, and maintained in these groups for the duration of the experiments	IVC: 2 adjacent pens, with each pen being 30.8 cm × 15.4 cm × 14.0 cm and a floor area of 333.5 cm2	Every other week	White pine shavings	Wound count at cage change = every other week and at the end of the study				Yes	Strain	Between	N/a	More aggression in BALB/ cJ strain than C57BL/6J	B6 mice did not show gross evidence of fight wounds during or at the end of the study. However fighting among BALB males was evident at all densities. None of the wounds observed, which were restricted to the tail, were considered severe or appeared to affect the animals’ overall health or body weight.
28	28.1	McQuaid, Robyn J. Audet, Marie-Claude Jacobson-Pick, Shlomit and Anisman, Hymie	Psychoneuroendocrinology	2013	Environmental enrichment influences brain cytokine variations elicited by social defeat in mice	Jackson Laboratory (Bar Harbor, Maine)	BALB/cByJ	48	6—8 weeks old, to experimental housing at arrival, keept there for 4 weeks with behavioural scoring 3 times a week	Male	3	Non-sibling	To experimental housing on arrival from vendor	Open cage: Standard: 27 x 21 x14 cm , Enriched 50 x 40 x 20 cm	Once weekly	Standard: one cotton nestlet; Enriched: rat maternity cages equipped with two running wheels, one shelter, oneshelter with an angled running wheel, as well as three tunnels and two cotton nestlets. Enrichment items were not changed throughout the experiment (but were replaced once a week during cage cleaning).	Home cage behaviour	Social defeat test			Yes	Enrichment	Between	N/a	No effect on aggression in home cage. Mice from standard cages more aggressive in social defeat test.	Home cage: Aggression levels were generally low; few aggressive encounters were witnessed during the 5 min/cage scoring sessions in either SE or EE home-cages. Further, of the initial 48 mice in the study, only three EE and two SE mice had to be removed for displaying overly aggressive behaviours (defined as continuous attacking so that injury had occurred) Social defeat test: During social inter…	There is also data in this paper where the SE and EE mice are beeing attacked by a larger mouse and where the SE but not the EE mice are fighting back. The conclusions are not related to group housing but to social defeat by an aggressive intruder. l. The behaviour displayed by the BALB/cByJ mice in their enriched environment was distinctly different from that previously seen in strains such as C…
29	29.1	Fairless, Andrew H. Katz, Julia M. Vijayvargiya, Neha Dow, Holly C. Kreibich, Arati Sadalge Berrettini, Wade H. Abel, Ted, and Brodkin, Edward S.	Behavioural Brain Research	2013	Development of home cage social behaviors in BALB/cJ vs. C57BL/6J mice	In house, originally from The Jackson Laboratory (Bar Harbor, ME)	C57BL/6J and BALB/cJ	80? Difficulties reading the correct number for each strain	To experimental housing at weaning, day 23-26, home cage behaviour studied at 30, 41, and 69 days of age	Male	2	Siblings	To experimental housing at weaning	Not mentioned	Not mentioned	Not mentioned	Home cage behaviour				Yes	Strain	Between	N/a	No effect on aggression	No mice showed any aggressive behaviors.
29	29.2	Fairless, Andrew H. Katz, Julia M. Vijayvargiya, Neha Dow, Holly C. Kreibich, Arati Sadalge Berrettini, Wade H. Abel, Ted, and Brodkin, Edward S.	Behavioural Brain Research	2013	Development of home cage social behaviors in BALB/cJ vs. C57BL/6J mice	In house, originally from The Jackson Laboratory (Bar Harbor, ME)	C57BL/6J	80? Difficulties reading the correct number for each strain	To experimental housing at weaning, day 23-26, home cage behaviour studied at 30, 41, and 69 days of age	Male	2	Siblings	To experimental housing at weaning	Not mentioned	Not mentioned	Not mentioned	Home cage behaviour				Yes	Age	Within	No	No effect on aggression, comparing 30, 41, and 69 days of age	No mice showed any aggressive behaviors.
29	29.3	Fairless, Andrew H. Katz, Julia M. Vijayvargiya, Neha Dow, Holly C. Kreibich, Arati Sadalge Berrettini, Wade H. Abel, Ted, and Brodkin, Edward S.	Behavioural Brain Research	2013	Development of home cage social behaviors in BALB/cJ vs. C57BL/6J mice	In house, originally from The Jackson Laboratory (Bar Harbor, ME)	BALB/cJ	80? Difficulties reading the correct number for each strain	To experimental housing at weaning, day 23-26, home cage behaviour studied at 30, 41, and 69 days of age	Male	2	Siblings	To experimental housing at weaning	Not mentioned	Not mentioned	Not mentioned	Home cage behaviour				Yes	Age	Within	No	No effect on aggression, comparing 30, 41, and 69 days of age	No mice showed any aggressive behaviors.
30	30.1	Page, D. L., and Glenner, G. G.	The American Journal of Pathology	1972	Social interaction and wounding in the genesis of "spontaneous" murine amyloidosis	National Institutes of Health Animal Production Section, except for SJL / J which was from Texas Inbred Mice Co, Houston, Texas	General purpose Swiss albino mice (GP) from a noninbred colony, NGP /N derived from GP, CFW (on a restricted randon mating system) and the inbred strains SJL/J, AL/N, Balb/C and C3H/Hen	161 out of which 76 were GP Swiss and the other strains had 10-25 mice each	Recieved at 6 weeks of age then into experimental housing	Male	3-25 (3, 5, 6, 10, 20, 25)	Non-sibling	Kept in same sex groups of 25-50 mice at the breeder from weaning (age 3 weks) untill arrival at age 6 weeks, then to experimental housing	Open cage: small 6 1/4 by 10 1/2 inches and large 18 by 10 1/2 inches	Twice weekly	Pine and hardwood sawdust with cedar shavings	Descriptive observation				Yes	Strain	Between	N/a	Differences between strains	The patterns of aggressive behavior and scarring were the same for the NGP/N mice as for the GP mice. The CFW mice had scars strictly confined to the region of the base of the tail and the posterior scrotum. The AL/N mice had few lesions, confined to superficial areas of the tail and focal areas of the snout. Observations during life were unable to establish dominant members of this group. Balb/C…	Study concerns sponteaneous amyloidosis - mice are not manipulated. The GP Swiss strain which is the one with the most mice in this study is said to be non-inbred
30	30.2	Page, D. L., and Glenner, G. G.	The American Journal of Pathology	1972	Social interaction and wounding in the genesis of "spontaneous" murine amyloidosis	National Institutes of Health Animal Production Section, except for SJL / J which was from Texas Inbred Mice Co, Houston, Texas	General purpose Swiss albino mice (GP) from a noninbred colony, NGP /N derived from GP, CFW (on a restricted randon mating system) and the inbred strains SJL/J, AL/N, Balb/C and C3H/Hen	161 out of which 76 were GP Swiss and the other strains had 10-25 mice each	Recieved at 6 weeks of age then into experimental housing	Male	3-25 (3, 5, 6, 10, 20, 25)	Non-sibling	Kept in same sex groups of 25-50 mice at the breeder from weaning (age 3 weks) untill arrival at age 6 weeks, then to experimental housing	Open cage: small 6 1/4 by 10 1/2 inches and large 18 by 10 1/2 inches	Twice weekly	Pine and hardwood sawdust with cedar shavings	Descriptive observation				Yes	Age	Within	No	Decreased aggression with increased age	Within 4 to 6 weeks after receipt in our animal care facilitv, acute scarring associated with fighting wounds and attempted mounting became evident in the groups of GP male mice studied and blood was usuallv present on the sides of the cage. Although 1 or 2 animals in each cage had no evident scarring, all the remaining animals had scars and/or wounds of the scrotal area, base of tail and, freque…	Study concerns sponteaneous amyloidosis - mice are not manipulated. The GP Swiss strain which is the one with the most mice in this study is said to be non-inbred
31	31.1	Sorensen, D. B. Johnsen, P. F. Bibby, B. M. Bottner, A. Bornstein, S. R. Eisenhofer, G. Pacak, K. Hansen, A. K.	Hormone and metabolic research = Hormon- und Stoffwechselforschung = Hormones et metabolisme	2005	PNMT transgenic mice have an aggressive phenotype	In house, the WT was originally from Taconic M&B	Transgenics overexpressing PNMT, C57BL/6J as WT	23 (11 transgenics)	Grouped for experiment at weaning, 3 weeks, aggression scored at 4, 5, 6, 8 and 10 weeks of age	Male	4	Siblings	Grouped for experiment at weaning	Open cage	Once weekly	Aspen bedding	Home cage behaviour day before cleaning, day of cleaning (after cleaning) and day after cleaning				Yes	Strain	Between	N/a	More aggression in transgenic line		One group consisting of Tg PNMT males was replaced prior to testing due to severe fighting leading to death. Preliminary studies showed very high mortality due to offensive aggression, especially when males (in that study) were introduced to a new group at 5 weeks of age. Authors has chaned their protocoll to be able to use this strain and says that grouping at 3 weeks and with siblings is what m…
31	31.2	Sorensen, D. B. Johnsen, P. F. Bibby, B. M. Bottner, A. Bornstein, S. R. Eisenhofer, G. Pacak, K., and Hansen, A. K.	Hormone and Metabolic Research	2005	PNMT transgenic mice have an aggressive phenotype	In house, the WT was originally from Taconic M&B	Transgenics overexpressing PNMT, C57BL/6J as WT	23 (11 transgenics)	Grouped for experiment at weaning, 3 weeks, aggression scored at 4, 5, 6, 8 and 10 weeks of age	Male	4	Siblings	Grouped for experiment at weaning	Open cage	Once weekly	Aspen bedding	Home cage behaviour day before cleaning, day of cleaning (after cleaning) and day after cleaning				Yes	Age	Within	No	Increased aggression with age up to 8 weeks, then decreasing
31	31.3	Sorensen, D. B. Johnsen, P. F. Bibby, B. M. Bottner, A. Bornstein, S. R. Eisenhofer, G. Pacak, K., and Hansen, A. K.	Hormone and Metabolic Research	2005	PNMT transgenic mice have an aggressive phenotype	In house, the WT was originally from Taconic M&B	Transgenics overexpressing PNMT, C57BL/6J as WT	23 (11 transgenics)	Grouped for experiment at weaning, 3 weeks, aggression scored at 4, 5, 6, 8 and 10 weeks of age	Male	4	Siblings	Grouped for experiment at weaning	Open cage	Once weekly	Aspen bedding	Home cage behaviour day before cleaning, day of cleaning (after cleaning) and day after cleaning				Yes	Group composition	Between	N/a	Decreased aggression when transgenics was kept mixed with WT
31	31.4	Sorensen, D. B. Johnsen, P. F. Bibby, B. M. Bottner, A. Bornstein, S. R. Eisenhofer, G. Pacak, K., and Hansen, A. K.	Hormone and Metabolic Research	2005	PNMT transgenic mice have an aggressive phenotype	In house, the WT was originally from Taconic M&B	Transgenics overexpressing PNMT, C57BL/6J as WT	23 (11 transgenics)	Grouped for experiment at weaning, 3 weeks, aggression scored at 4, 5, 6, 8 and 10 weeks of age	Male	4	Siblings	Grouped for experiment at weaning	Open cage	Once weekly	Aspen bedding	Home cage behaviour day before cleaning, day of cleaning (after cleaning) and day after cleaning				Yes	Cage cleaning	Within		No effect on aggression	"Cage-cleaning did not influcence the level of aggression"
32	32.1	Bove, Maria Ike, Kevin Eldering, Adriaan Buwalda, Bauke de Boer, Sietse F. Morgese, Maria Grazia Schiavone, Stefania Cuomo, Vincenzo Trabace, Luigia., and Kas, Martien J. H.	Behavioural Brain Research	2018	The Visible Burrow System: A behavioral paradigm to assess sociability and social withdrawal in BTBR and C57BL/6J mice strains	In house, originally C57BL/6J from Janvier Labs (Le Genest-Saint-Isle, France) and BTBR from Jackson Laboratory (Bar Harbor, Maine, U. S.)	C57BL/6J and BTBR	30 males (12BTBR, 18C57), A total of 3 C57BL/6J and 2 BTBR colonies were scored manually for 5 days.	Not stated clearly, breed in house, housed in experimental room for 2 weeks before experiment, housed and studied in experimental system for 5 days before euthanization	Males and sterilized females in same cage	8, 6 males and 2 females	Non-sibling, at most 2 mice from same litter per colony	Breed in house, housed in experimental room for 2 weeks before experiment, housed and studied in experimental system for 5 days before euthanization	Large vivarium: The system consisted of two parts: an open arena (50cm×50cm) with two stations where animals had access to food and water ad libitum, and a burrow (50cm×25cm) with 4 chambers and a corridor. the burrow was in complete darkness at all times, re- sembling the natural environment. Within the burrow 2 big chambers (7,5cm×12,5cm) and 2 small chambers (7,5cm×7,5cm) were placed with a tu…	No cleaning during the 5 days experiment, except for this cleaning is not mentioned	Not mentioned what materials are beeing used only the structure of the vivarium	Home cage behaviour				Yes	Strain	Between	N/a	No effect on overall aggression	We scored daily aggressive behavior for both frequency and duration. We found that BTBR showed significantly more time spent performing aggression during day 1, while there were no differences in the overall aggressive behavior duration between the two strains. In addition, frequency of aggression was increased in BTBR during day 1, while there were no differences detected for the total aggressio…	Females were previous sterilized by ligating the oviducts and leaving the ovaries intact in order to maintain the estrous cycle.
32	32.2	Bove, Maria Ike, Kevin Eldering, Adriaan Buwalda, Bauke de Boer, Sietse F. Morgese, Maria Grazia Schiavone, Stefania Cuomo, Vincenzo Trabace, Luigia., and Kas, Martien J. H.	Behavioural Brain Research	2018	The Visible Burrow System: A behavioral paradigm to assess sociability and social withdrawal in BTBR and C57BL/6J mice strains	In house, originally C57BL/6J from Janvier Labs (Le Genest-Saint-Isle, France) and BTBR from Jackson Laboratory (Bar Harbor, Maine, U. S.)	BTBR	30 males (12BTBR, 18C57), A total of 3 C57BL/6J and 2 BTBR colonies were scored manually for 5 days.	Not stated clearly, breed in house, housed in experimental room for 2 weeks before experiment, housed and studied in experimental system for 5 days before euthanization	Males and sterilized females in same cage	8, 6 males and 2 females	Non-sibling, at most 2 mice from same litter per colony	Breed in house, housed in experimental room for 2 weeks before experiment, housed and studied in experimental system for 5 days before euthanization	Large vivarium: The system consisted of two parts: an open arena (50cm×50cm) with two stations where animals had access to food and water ad libitum, and a burrow (50cm×25cm) with 4 chambers and a corridor. the burrow was in complete darkness at all times, re- sembling the natural environment. Within the burrow 2 big chambers (7,5cm×12,5cm) and 2 small chambers (7,5cm×7,5cm) were placed with a tu…	No cleaning during the 5 days experiment, except for this cleaning is not mentioned	Not mentioned what materials are beeing used only the structure of the vivarium	Home cage behaviour				Yes	Time	Within	No	More aggression in BTBR as an novelty induced effect	We scored daily aggressive behavior for both frequency and duration. We found that BTBR showed significantly more time spent performing aggression during day 1, while there were no differences in the overall aggressive behavior duration between the two strains. In addition, frequency of aggression was increased in BTBR during day 1, while there were no differences detected for the total aggressio…
32	32.3	Bove, Maria Ike, Kevin Eldering, Adriaan Buwalda, Bauke de Boer, Sietse F. Morgese, Maria Grazia Schiavone, Stefania Cuomo, Vincenzo Trabace, Luigia., and Kas, Martien J. H.	Behavioural Brain Research	2018	The Visible Burrow System: A behavioral paradigm to assess sociability and social withdrawal in BTBR and C57BL/6J mice strains	In house, originally C57BL/6J from Janvier Labs (Le Genest-Saint-Isle, France) and BTBR from Jackson Laboratory (Bar Harbor, Maine, U. S.)	C57BL/6J	30 males (12BTBR, 18C57), A total of 3 C57BL/6J and 2 BTBR colonies were scored manually for 5 days.	Not stated clearly, breed in house, housed in experimental room for 2 weeks before experiment, housed and studied in experimental system for 5 days before euthanization	Males and sterilized females in same cage	8, 6 males and 2 females	Non-sibling, at most 2 mice from same litter per colony	Breed in house, housed in experimental room for 2 weeks before experiment, housed and studied in experimental system for 5 days before euthanization	Large vivarium: The system consisted of two parts: an open arena (50cm×50cm) with two stations where animals had access to food and water ad libitum, and a burrow (50cm×25cm) with 4 chambers and a corridor. the burrow was in complete darkness at all times, re- sembling the natural environment. Within the burrow 2 big chambers (7,5cm×12,5cm) and 2 small chambers (7,5cm×7,5cm) were placed with a tu…	No cleaning during the 5 days experiment, except for this cleaning is not mentioned	Not mentioned what materials are beeing used only the structure of the vivarium	Home cage behaviour				Yes	Time	Within	No	No effect on time in C57/bl6	We scored daily aggressive behavior for both frequency and duration. We found that BTBR showed significantly more time spent performing aggression during day 1, while there were no differences in the overall aggressive behavior duration between the two strains. In addition, frequency of aggression was increased in BTBR during day 1, while there were no differences detected for the total aggressio…
33	33.1	Hilakivi-Clarke, L. A., and Lister, R. G.	Journal of Comparative Psychology (Washington, D.C. : 1983)	1992	Are there preexisting behavioral characteristics that predict the dominant status of male NIH Swiss mice (Mus musculus)?	National Institutes of Health	Swiss mice (Mus musculus; Cr:NIH[S]),	115 in experiment 1	Not mentioned	Male	5	Not mentioned	Treatment: Isolated upon arrival or directly housed in groups	Not mentioned	Not mentioned	Not mentioned	Descriptive observation				Yes	History	Between	N/a	Increased aggression in groups formed from previously isolated animals	In this study, isolation, which lasted less than 2 weeks, made the animals start to fight immediately after they were housed in groups of 4-5. Within 2-5 days of group housing, all mice in each cage, except the alpha, had serious bite marks on their tails and backs. Experiment 1 showed that a much smaller proportion of mice (10%-25% instead of 90%-100% seen after isolation) showed this type of ag…	There is also data from a resident intruder test in this paper, however there the results are divided based on dominant and subordinate rather than by housing history
34	34.1	Burright, R. G., Freeman, M. J., and Donovick, P. J.	Journal of Comparative Psychology (Washington, D.C. : 1983)	1988	Repeated tests of intermale aggression in mice (Mus musculus) are influenced by housing and test conditions	In house	HET: Binghamton Heterogeneous stock.HET mice were systematically outbred from a closed line in which the parents were selected for genetic diversity, and the breeding program was specifically designed to maintain a maximum amount of genetic variation.	24 group housed (12 for each replicate)	To experimental housing at approx 42 days of age, housed there for 11 days prior to testing	Male	4	Non-sibling	Not mentioned	Not mentioned	Not mentioned	Two tiered cages. A free-hanging chain provided access to the levels of these tiered cages, and food and water were available on the upper tier. Pine shavings are mentioned and used in the test cages but the text does not say that that is what is used in the housing.	Novel arena with clean or female-soiled pine shavings in the cage, the test cage is 2 tiered as the housing cages				Yes	Time or age ?	Within	No	Increased aggression with time if tested over clean shavings, if over female soiled shavings decrease instead	Group-housed mice were tested over female-soiled shavings, the mean number of aggressive bouts decreased from the first to the third 3-day block. In contrast, for those group-housed mice tested over clean shavings aggressive bouts increased over repeated test blocks.	the striking interaction of housing and shavings condition observed over days does not lend itself to any simple interpretation of which specific stimuli resulted in habituation or active inhibition of aggressive behavior. Clearly, one can argue only that the housing and testing conditions produced effects that dramatically and differentially altered the ways in which the male HET mice perceived …
35	35.1	Hunt, C., and Hambly, C.	Physiology & Behavior	2006	Faecal corticosterone concentrations indicate that separately housed male mice are not more stressed than group housed males	Not mentioned	MF1	54	Housed in groups of 12 from weaning, at 9 weeks housed in groups of 6 for experiment, 1 week of settling period then 6 weeks of experiment	Male	3 OR 6	Non-sibling	Housed in large groups of 12 from weaning. Was 9 weeks when entering the experiment, then housed in groups of 6 for a week of settlement, then into experimental housing.	Open cage: 160 OR 320 cm2 per mouse	Not mentioned	A basic level of enrichment was given to the mice for Days 1–28 – with one polycarbonate house (per three mice), sawdust and paper bedding. On Days 28–42 they had high level enrichment of sawdust, polycarbonate house (per three mice), bedding squares which they had to shred and make into a nest themselves, and one large cardboard tube (per three mice).	Home cage behaviour				Yes	Enrichment	Within	No	No effect on aggression	No text really, see fig 7b	Mice are put in separate cages for 2h periods for feacal sampling. Did they really do the statistics for 3 vs 6 etc? The text mainly concerns single vs group.
35	35.2	Hunt, C., and Hambly, C.	Physiology & Behavior	2006	Faecal corticosterone concentrations indicate that separately housed male mice are not more stressed than group housed males	Not mentioned	MF1	54	Housed in groups of 12 from weaning, at 9 weeks housed in groups of 6 for experiment, 1 week of settling period then 6 weeks of experiment	Male	3 OR 6	Non-sibling	Housed in large groups of 12 from weaning. Was 9 weeks when entering the experiment, then housed in groups of 6 for a week of settlement, then into experimental housing.	Open cage: 160 OR 320 cm2 per mouse	Not mentioned	A basic level of enrichment was given to the mice for Days 1–28 – with one polycarbonate house (per three mice), sawdust and paper bedding. On Days 28–42 they had high level enrichment of sawdust, polycarbonate house (per three mice), bedding squares which they had to shred and make into a nest themselves, and one large cardboard tube (per three mice).	Home cage behaviour				Yes	Group size	Between	N/a	No effect on aggression	No text really, see fig 5	Mice are put in separate cages for 2h periods for feacal sampling. Did they really do the statistics for 3 vs 6 etc? The text mainly concerns single vs group.
35	35.3	Hunt, C., and Hambly, C.	Physiology & Behavior	2006	Faecal corticosterone concentrations indicate that separately housed male mice are not more stressed than group housed males	Not mentioned	MF1	54	Housed in groups of 12 from weaning, at 9 weeks housed in groups of 6 for experiment, 1 week of settling period then 6 weeks of experiment	Male	3 OR 6	Non-sibling	Housed in large groups of 12 from weaning. Was 9 weeks when entering the experiment, then housed in groups of 6 for a week of settlement, then into experimental housing.	Open cage: 160 OR 320 cm2 per mouse	Not mentioned	A basic level of enrichment was given to the mice for Days 1–28 – with one polycarbonate house (per three mice), sawdust and paper bedding. On Days 28–42 they had high level enrichment of sawdust, polycarbonate house (per three mice), bedding squares which they had to shred and make into a nest themselves, and one large cardboard tube (per three mice).	Home cage behaviour				Yes	Density	Between	N/a	No effect on aggression	No text really, see fig 5	Mice are put in separate cages for 2h periods for feacal sampling. Did they really do the statistics for 3 vs 6 etc? The text mainly concerns single vs group.
36	36.1	Lewejohann, Lars Kloke, Vanessa Heiming, Rebecca S. Jansen, Friederike Kaiser, Sylvia Schmitt, Angelika Lesch, Klaus Peter., and Sachser, Norbert	Behavioural Brain Research	2010	Social status and day-to-day behaviour of male serotonin transporter knockout mice	In house, bred at the Department of Behavioural Biology at the University of Muenster, Germany. The original breeding stock was obtained from the Department of Psychiatry at the University of Wuerzburg, Germany, where the 5-HTT KO mice were generated and backcrossedfor >10 generations on a C57BL/6 genetic background.	KO of 5-HTT in C57BL/6 genetic background	14 heterozygous, and 14 wild-type	Weaned at 21 days, kept in sibling groups with same sex untill transfer to experimental housing and behavioural study at day 66 +/- 15, kept for 1 week in experimental housing before behavioural study	Male	2-5 (from fig 6) all cages starts of with 5 mice but they are allowed to emigrate and also removed due to injuries	Non-sibling in the experimental housing	Weaned at 21 days, kept in sibling groups with same sex untill transfer to experimental housing	Glass terraria: 100×40×34.5cm	Not mentioned	Sawdust bedding. In each terrarium an additional polycarbonate cage (37cm×21cm×15cm)equipped with a plastic inset (23.5cm×17.5cm×5.5cm) and a wooden climbing frame was placed. Openings at the front and back side provided access to this inner cage. The terraria contained an upper floor realised by a plastic plain (45cm×33cm) installed 25cm above the ground that was accessible by stairways on two s…	Home cage behaviour	Competitive dyadic housing - 2 mice of diff genotype but same social status housed in the terraria untill 1 emigrated or was severly injured without emigrating			Yes	KO (HOM)	Between	N/a	Less aggression in KO strain	Home cage behaviour: Offensive aggressive behavioural patterns on the other hand were significantly reduced in KO mice compared with WT. Comparing HET with WT mice revealed only marginal differences that did not reach statistical significance. Dyadic encounter: While wild-type mice (WT) won significantly more dyadic encounters than KO mice, HET mice did not differ significantly from WT regarding …	Nevertheless, 5-HTTKOmice were equally able to establish and maintain dominance relationships including significant amounts of aggressive behaviour. What is more, in two of the terraria the dominant males severely injured their conspecifics. Thus, we highlight that the loss of the 5-HTT did not necessarily bring about a peaceful behavioural profile in groups of males of the same genotype.
36	36.2	Lewejohann, Lars Kloke, Vanessa Heiming, Rebecca S. Jansen, Friederike Kaiser, Sylvia Schmitt, Angelika Lesch, Klaus Peter., and Sachser, Norbert	Behavioural Brain Research	2010	Social status and day-to-day behaviour of male serotonin transporter knockout mice	In house, bred at the Department of Behavioural Biology at the University of Muenster, Germany. The original breeding stock was obtained from the Department of Psychiatry at the University of Wuerzburg, Germany, where the 5-HTT KO mice were generated and backcrossedfor >10 generations on a C57BL/6 genetic background.	KO of 5-HTT in C57BL/6 genetic background	10 knockout 13 WT	Weaned at 21 days, kept in sibling groups with same sex untill transfer to experimental housing and behavioural study at day 66 +/- 15, kept for 1 week in experimental housing before behavioural study	Male	2-5 (from fig 6) all cages starts of with 5 mice but they are allowed to emigrate and also removed due to injuries	Non-sibling in the experimental housing	Weaned at 21 days, kept in sibling groups with same sex untill transfer to experimental housing	Glass terraria: 100×40×34.5cm	Not mentioned	Sawdust bedding. In each terrarium an additional polycarbonate cage (37cm×21cm×15cm)equipped with a plastic inset (23.5cm×17.5cm×5.5cm) and a wooden climbing frame was placed. Openings at the front and back side provided access to this inner cage. The terraria contained an upper floor realised by a plastic plain (45cm×33cm) installed 25cm above the ground that was accessible by stairways on two s…	Home cage behaviour	Competitive dyadic housing - 2 mice of diff genotype but same social status housed in the terraria untill 1 emigrated or was severly injured without emigrating			Yes	KO (HET)	Between	N/a	No significant difference	Comparing HET with WT mice revealed only marginal differences that did not reach statistical significance. Dyadic encounter: While wild-type mice (WT) won significantly more dyadic encounters than KO mice, HET mice did not differ significantly from WT regarding their propensity to win an encounter
37	37.1	Whitaker, Julia Moy, Sheryl S. Godfrey, Virginia Nielsen, Judith Bellinger, Dwight., and Bradfield, John	Lab Animal	2009	Effects of cage size and enrichment on reproductive performance and behavior in C57BL/6Tac mice	In house in the experiment, originally from Taconic Farms (Germantown, NY)	C57BL / 6Tac	57	Weaned at 21 days, housed in groups of 2-5	Male	2-5	Non-sibling	Weaning at day 21 kept in same sex groups of 2-5, non-sibling	IVC	Not metioned for the progeny used in behavioural testing but every other week for the breeding pairs	Bed-o ’ cobs bedding no enrichment for the progeny in the behavioural testing	Descriptive observation				No		Between	N/a	No effect	We monitored male mice for physical injury indicative of fighting, which would necessitate separation. No injuries were observed in this study.	The statement concerning fighting/injuries relates to the progeny obtained within the experiment.
38	38.1	Hilakivi-Clarke, L. and Dickson, R. B.	Acta Oncologica (Stockholm, Sweden)	1995	Stress influence on development of hepatocellular tumors in transgenic mice overexpressing TGF alpha	In house	Tg of TNFa in CD-1 background	80 to start with but some are lost during the experiment	Housed with siblings to 4 months old then to experimental housing. Sacrificed at 11 months.	Male	3-4	Treatment: Sibling and non-sibling groups used	Housed with siblings to 4 months old then to experimental housing with sibling and non-sibling groups	Not mentioned	Not mentioned	Not mentioned	Descriptive observation				Yes	Group composition - housing with siblings or non-siblings	Between	N/a	Increased aggression in non-sibling groups	Among the group-housed mice, 3-4 animals were kept in each cage to avoid serious fighting among the non-sibling housed males. Immediately following new housing arrangements, non-sibling housed mice started to fight. The fighting became less frequent by time, and when the non-sibling housed mice were sacrificed to determine the status of liver tumorigenesis, none or only minor fight-marks were see…
38	38.2	Hilakivi-Clarke, L. and Dickson, R. B.	Acta Oncologica (Stockholm, Sweden)	1995	Stress influence on development of hepatocellular tumors in transgenic mice overexpressing TGF alpha	In house	Tg of TNFa in CD-1 background	40 to start with but some are lost during the experiment	Housed with siblings to 4 months old then to experimental housing. Sacrificed at 11 months.	Male	3-4	Non-sibling groups used	Housed with siblings to 4 months old then to experimental housing with sibling and non-sibling groups	Not mentioned	Not mentioned	Not mentioned	Descriptive observation				Yes	Time	Within	N/a	Decreased fighting over time in non-sibling group	The fighting became less frequent by time, and when the non-sibling housed mice were sacrificed to determine the status of liver tumorigenesis, none or only minor fight-marks were seen.
39	39.1	Haemisch, A. and Gartner, K.	Acta Physiologica Scandinavia	1997	Effects of cage enrichment on territorial aggression and stress physiology in male laboratory mice	Not mentioned	DBA/2J	66	Adult when the experiment starts and the experiment goes on for 6 weeks	Male	3	Not mentioned	Not mentioned	Open cage: 42 x 25.5 x 15 cm	Not mentioned	Standard OR Enriched with a labyrinth	Aggressive behaviour between cagemates - not specified if this is in homecage or in a test situation	Resident intruder test			Yes	Enrichment	Between	N/a	Incresed aggression in enriched cages	The amounts of attacks against intruders increased significantly in the enriched groups (data not shown). Also in the enriched cages unstable dominant relations were prevalent with an intensified competition for the dominant position.	Not showing the data for the agression tests and also not describing exactly how these tests were performed.
40	40.1	Bergmann, P. Militzer, K. and Buttner, D.	Journal of Experimental Animal Science	1994	Environmental enrichment and aggressive behaviour: Influence on body weight and body fat in male inbred HLG mice	In house	HLG/Zte	90	Weaned at 21 days, transfered to experimental housing at 61 days, scored for wounds after euthanization at 125 days	Male	3	Sibling	Weaned at 21 days, kept in sibling groups till 61 days when the groups were transfered to experimental housing	Open cage: 800cm2 or 6500cm2	Not mentioned	Standard OR Enriched with an unstructured area with soft wood granulate bedding, nest box, water bottle this area connected to a fodder rack by a meander-like passage-way. This enriched environment commes in 2 waya one with only 1 passage to the fodder rack (P-group) and one with 9 passages to the fodder rack.	Bite wounds scored after euthanization				Yes	Enrichment	Between	N/a	Incresed aggression in enriched cages	Percentage of injured animals is 11 in control group, 55 in O-group and 86 in P-group. In an environment such as the P cage with no opportunities to escape the same frequency of attacks would result in more wounds than in an environment providing several evasive pathways (O-cage). The different physical development and number of inflicted bites observed in the similarly sized O and P cages shows …
41	41.1	Saldívar-González, J. A. Posadas-Andrews, A. Rojas, J. A. Yoldi-Negrete, M. Álvarez-Sekely, A. Flores-Hernández, V. Ortiz-León, S. Foilloux-Morales, C. Mayagoitia, L. and Mondragón-Ceballos, R.	Current Topics in Pharmacology	2007	Effect of imipramine and electro convulsive stimulation in mice under social stress conditions	In house	Balb/cJ	24 or 48? (figure 2)	14 weeks old, 5 days adaptation in experimental housing period before study started	Male	3 OR 9	Not mentioned	Not mentioned	Glass cage 27x30x50cm	Not mentioned	Not mentioned	Home cage behaviour				Yes	Group size	Between	N/a	Decreased aggression with larger group size	Aggressive behaviour exhibited by dominant animals in the large group is tem times lower than within the small animal group. In 9 animal groups the surface per mouse was 83cm2 while in 3 animals groups the surface was 250cm2 per mouse. Therefore, the significant increase in the mouse/space ratio in 3 individual groups probably elicited a territorial motivated behaviour associated with socially im…
42	42.1	Benus, R. F. and Henkelmann, C.	Behaviour	1998	Litter composition influences the development of aggression and behavioural strategy in male Mus domesticus	In house	LAL-line a selection line for long attack latency established from wild mice	54	Groups established on PND 4, weaned on day 27 and kept til day 57, aggression studied from day 17 to 57 with intervalls of 2-5 days.	Male	6	Sibling to the extent possible but other pups was added on PND 4 to generate the 6+0 litters	Grouped on PND 4	Open cage: 55x33x20cm	Not mentioned	Not mentioned	Home cage behaviour				Yes	Age	Within	No	Increased aggression with time from 42 to 57 days.	In the 6+0 litters aggressive interactions were not observed until day 42 but then increased with a maximum on day 52 and 57.
43	43.1	Paterson, A. T. Rickerby, J. Simpson, J. Vickers, C.	Physiology and Behavior	1980	Possible interaction of melanocyte-stimulating hormone (MSH) and the pineal in the control of territorial aggression in mice	Tuck and sons Ltd.	TO	54 (control and saline injected wich are pooled in the paper)	Not mentioned	Male	3 per group, 2 groups per cage	Not mentioned	Experimental housing for 3 weeks during which the fighting was observed	Open cage: 30x20x15 cm with a opaque partition so that each group of 3 mice has only half of this cage size	No cleaning during the 3 weeks of experimental housing	Sawdust	Descriptive observation				No				Fighting observed	The territoriality of the behaviour was indicated by the abscence of attacks on fellow group members (in the aggression test on which there are no conclusions on housing). No or few such attacks took place during the confrontations, although intra-group fighting was frequently seen during the preceding three weeks. Such incidents were noted and...	2 groups of 3 mice are kept in the same cage with an opaque partition in the middle
44	44.1	Rodriguiz, Ramona M., Richard Chu, Marc G. Caron, and William C. Wetsel.	Behavioural Brain Research	2004	Aberrant responses in social interaction of dopamine transporter knockout mice	In house	C57BL/6J-129/SvJ background DAT KO	Not mentioned	Weaned at 21-30 days and housed in groups of 4, at 10-16 weeks of age divided into 4 groups based on experiments to be performed. Then put into new groups of 4 with unknown mice.	Male	4	Non-sibling	Weaned at 21-30 days, housed 4 by 4 untill 10-16 weeks then re-grouped 4 by 4.	No data	No data	No data	Home cage behaviour in lights on period	Tube-dominance testing			Yes	Strain (KO)	Between	N/a	Increased aggression in KO-mice at least in home-cage context	Establishment and stability of the social hierarchy: The KO animals were significantly more aggressive following the formation of new social groups on day 1 than the WT males [Fig. 2C; F(1, 50) = 3.62, P = 0.05]. After this time, aggression between cage-mates was reduced for both genotypes over the next two days. By the fourth day, mutants consistently showed higher levels of agonistic behaviors …	Only data from first part of study. In regards to tube test: With respect to agonistic behaviors, WT animals had a stronger tendency to initiate these responses than KO mice [F(1, 55) = 3.33, P< 0.06]. In discussion:: Group-housed mutants are more reactive and display more aggressive behaviors than WT controls.
45	45.1	Van Loo, P. L. P., Cljj Kruitwagen, L. F. M. Van Zutphen, J. M. Koolhaas, and V. Baumans.	Animal Welfare	2000	Modulation of aggression in male mice: Influence of cage cleaning regime and scent marks	In house	BALB/cAnNCrlBR	36	Weaned at 3 weeks, 4 weeks at start of experiment	Male	3	Treatment - sibling and non-siling tested	Weaned at 3 weeks experiment started at 4 weeks	Open cage (wire topped 375 cm2)	Treatment: Once weekly one of 3 cleaning procedures: all clean, transfered sawdust or transfered nesting material	Saw dust (50g) Kleenex tissues (3)	Home cage behaviour after cage cleaning	Wounding before cage cleaning			Yes	Cleaning procedure	Within	Yes	Decreased aggression when transfering nesting material - not so much as compared to clean but as compared to trasnfering dirty sawdust	Latency until the first agonistic encounter was significantly influenced by type of cage cleaning (P <0.05; Figure 2, top left). Multiple comparisons indicated that this was mainly due to a difference between ‘nest’ and ‘sawdust’ (Bonferroni α = 0.017, Psawdust-nest = 0.026).Type of cage cleaning also had a significant effect on frequency of agonistic encounters in the hour following cage cleanin…	Main conclusion: Transfer of sawdust seemed to have aggression-eliciting effects in the present study,although these results were not significant. The most important and conclusive finding in this study was that the transfer of nesting material significantly reduced aggression between male mice after cage cleaning.
45	45.2	Van Loo, P. L. P., Cljj Kruitwagen, L. F. M. Van Zutphen, J. M. Koolhaas, and V. Baumans.	Animal Welfare	2000	Modulation of aggression in male mice: Influence of cage cleaning regime and scent marks	In house	BALB/cAnNCrlBR	36	Weaned at 3 weeks, 4 weeks at start of experiment	Male	3	Treatment - sibling and non-siling tested	Weaned at 3 weeks experiment started at 4 weeks	Open cage (wire topped 375 cm2)	Treatment: Once weekly one of 3 cleaning procedures: all clean, transfered sawdust or transfered nesting material	Saw dust (50g) Kleenex tissues (3)	Home cage behaviour after cage cleaning	Wounding before cage cleaning			Yes	Sibling vs Non-sibling	Between	N/a	No effect	No statistically significant differences were found between siblings and mixed weanlings for any of the behavioural or physiological results (Table I).
45	45.3	Van Loo, P. L. P., Cljj Kruitwagen, L. F. M. Van Zutphen, J. M. Koolhaas, and V. Baumans.	Animal Welfare	2000	Modulation of aggression in male mice: Influence of cage cleaning regime and scent marks	In house	BALB/cAnNCrlBR	36	Weaned at 3 weeks, 4 weeks at start of experiment	Male	3	Treatment - sibling and non-siling tested	Weaned at 3 weeks experiment started at 4 weeks	Open cage (wire topped 375 cm2)	Treatment: Once weekly one of 3 cleaning procedures: all clean, transfered sawdust or transfered nesting material	Saw dust (50g) Kleenex tissues (3)	Home cage behaviour after cage cleaning	Wounding before cage cleaning			Yes	Age	Within	No	Increased aggression with age from 4-6 to 10-12 weeks	Older mice not only showed more agonistic encounters, the encounters also lasted longer with increasing age (P < 0.001
46	46.1	Vaughan, Lewis M., Jane S. Dawson, Paula R. Porter, and Alexandra L. Whittaker.	Journal of hte American Association for Laboratory Animal Sciences	2014	Castration promotes welfare in group-housed male Swiss outbred mice maintained in educational institutions	In house (Breeding stock from University of Adelaide Laboratory Animal Services, Adelaide, Australia)	Swiss ARC;ARC(S)	160 (80 castrated, 80 control)	6-9 week surgery. 1month after surgery beahvior observations begin and lasted for 3 month	Male	10	Non-sibling	At weaning grouped 10 by 10, castrated at 6-9 weeks	Polycarbonate open top rat cage (59cmx38,5cmx20cm)	Not mentioned	Tissues, cardboard rolls, egg cartons and a running wheel	Home cage behaviour light period not at cage cleaning	Wound count			Yes	Castration	Between	N/a	Decreased aggression in cages of castrated animals as compared to intact	significant (P ≤ 0.05) differences between castrated and control mice for all variables. Similarly, bite injury data showed significant differences between treatment groupsfor all parameters measured. For the intact controls, the number of mice with bites (mean ± SEM) was 34.8 ± 5, with 49.3 ± 8 bites per cage. Injuries were categorized as minor, moderate, or severe, corresponding to 19.6 ± 3.7, …	Castration therefore improves welfare in group-housed male mice and thus provides a husbandry alternative to individually housing animals in nonstudy situations.
46	46.2	Vaughan, Lewis M., Jane S. Dawson, Paula R. Porter, and Alexandra L. Whittaker.	Journal of hte American Association for Laboratory Animal Sciences	2014	Castration promotes welfare in group-housed male Swiss outbred mice maintained in educational institutions	In house (Breeding stock from University of Adelaide Laboratory Animal Services, Adelaide, Australia)	Swiss ARC;ARC(S)	160 (80 castrated, 80 control)	6-9 week surgery. 1month after surgery beahvior observations begin and lasted for 3 month	Male	10	Non-sibling	At weaning grouped 10 by 10, castrated at 6-9 weeks	Polycarbonate open top rat cage (59cmx38,5cmx20cm)	Not mentioned	Tissues, cardboard rolls, egg cartons and a running wheel	Home cage behaviour light period not at cage cleaning	Wound count			Yes	Age	Within	No	Decreased aggression in the form of injuries as the study proressed	Repeatedmeasures ANOVA of aggressive and defensive–avoidance events data for the intact mice over the duration of the study revealed that time was not a statistically significant variable. However, in intact mice, time was a significant (P < 0.05;repeated-measures ANOVA) variable for number of bites per cage and was associated with a decrease in the number of injuries as the study progressed.
47	47.1	Lockworth, Cynthia R., Sun-Jin Kim, Jun Liu, Shana L. Palla, and Suzanne L. Craig.	Journal of the American Association for Laboratory Animal Sciences	2015	Effect of Enrichment Devices on Aggression in Manipulated Nude Mice	National Cancer Institute (Frederick Cancer Research Facility, Frederick, MD)	Athymic NCrnu/nu	100	8 week at arrival	Male	5	Not mentioned, most likely non-sibling	Arrived at 8 weeks, housed 5 per cage for acclimation during 10 days	IVC (36,5x20,7x13)	Every 2 weeks	Treatment: Cotton squares OR Nylon bone. Corncob as bedding.	Wound grading				Yes	Enrichment	Between	N/a	No effect of enrichment on aggression	Overall, the proportions of mouse-days with new wounds (Table 2) were not significantly different among the 5 enrichment groups (P = 0.24). The proportion of mouse-days with new wounds in the cotton-squares group did not differ significantly from that of any other group. During the first week of wound assessments (Figure 1), mean wound rates increased rapidly for a short duration when the mice ex…	Manipulations. Because this study was conducted concurrently with another study, common research variables were incorporated, which allowed us to assess the effect of manipulations on aggression and enrichment in the mice. These manipulations included randomization on day 20, surgery (prostate and tibial injections) on days 24 and 25, anesthesia with imaging on day 40, and intraperitoneal injecti…
47	47.2	Lockworth, Cynthia R., Sun-Jin Kim, Jun Liu, Shana L. Palla, and Suzanne L. Craig.	Journal of the American Association for Laboratory Animal Sciences	2015	Effect of Enrichment Devices on Aggression in Manipulated Nude Mice	National Cancer Institute (Frederick Cancer Research Facility, Frederick, MD)	Athymic NCrnu/nu	100	8 week at arrival	Male	5	Not mentioned, most likely non-sibling	Arrived at 8 weeks, housed 5 per cage for acclimation during 10 days	IVC (36,5x20,7x13)	Every 2 weeks	Treatment: Cotton squares OR Mouse house and wheel. Corncob as bedding.	Wound grading				Yes	Enrichment	Between	N/a	No effect of enrichment on aggression	Overall, the proportions of mouse-days with new wounds (Table 2) were not significantly different among the 5 enrichment groups (P = 0.24). The proportion of mouse-days with new wounds in the cotton-squares group did not differ significantly from that of any other group. During the first week of wound assessments (Figure 1), mean wound rates increased rapidly for a short duration when the mice ex…	Manipulations. Because this study was conducted concurrently with another study, common research variables were incorporated, which allowed us to assess the effect of manipulations on aggression and enrichment in the mice. These manipulations included randomization on day 20, surgery (prostate and tibial injections) on days 24 and 25, anesthesia with imaging on day 40, and intraperitoneal injecti…
47	47.3	Lockworth, Cynthia R., Sun-Jin Kim, Jun Liu, Shana L. Palla, and Suzanne L. Craig.	Journal of the American Association for Laboratory Animal Sciences	2015	Effect of Enrichment Devices on Aggression in Manipulated Nude Mice	National Cancer Institute (Frederick Cancer Research Facility, Frederick, MD)	Athymic NCrnu/nu	100	8 week at arrival	Male	5	Not mentioned, most likely non-sibling	Arrived at 8 weeks, housed 5 per cage for acclimation during 10 days	IVC (36,5x20,7x13)	Every 2 weeks	Treatment: Cotton squares OR Paper rolls. Corncob as bedding.	Wound grading				Yes	Enrichment	Between	N/a	No effect of enrichment on aggression	Overall, the proportions of mouse-days with new wounds (Table 2) were not significantly different among the 5 enrichment groups (P = 0.24). The proportion of mouse-days with new wounds in the cotton-squares group did not differ significantly from that of any other group. During the first week of wound assessments (Figure 1), mean wound rates increased rapidly for a short duration when the mice ex…	Manipulations. Because this study was conducted concurrently with another study, common research variables were incorporated, which allowed us to assess the effect of manipulations on aggression and enrichment in the mice. These manipulations included randomization on day 20, surgery (prostate and tibial injections) on days 24 and 25, anesthesia with imaging on day 40, and intraperitoneal injecti…
47	47.4	Lockworth, Cynthia R., Sun-Jin Kim, Jun Liu, Shana L. Palla, and Suzanne L. Craig.	Journal of the American Association for Laboratory Animal Sciences	2015	Effect of Enrichment Devices on Aggression in Manipulated Nude Mice	National Cancer Institute (Frederick Cancer Research Facility, Frederick, MD)	Athymic NCrnu/nu	100	8 week at arrival	Male	5	Not mentioned, most likely non-sibling	Arrived at 8 weeks, housed 5 per cage for acclimation during 10 days	IVC (36,5x20,7x13)	Every 2 weeks	Treatment: Cotton squares OR Shredded paper. Corncob as bedding.	Wound grading				Yes	Enrichment	Between	N/a	No effect of enrichment on aggression	Overall, the proportions of mouse-days with new wounds (Table 2) were not significantly different among the 5 enrichment groups (P = 0.24). The proportion of mouse-days with new wounds in the cotton-squares group did not differ significantly from that of any other group. During the first week of wound assessments (Figure 1), mean wound rates increased rapidly for a short duration when the mice ex…	Manipulations. Because this study was conducted concurrently with another study, common research variables were incorporated, which allowed us to assess the effect of manipulations on aggression and enrichment in the mice. These manipulations included randomization on day 20, surgery (prostate and tibial injections) on days 24 and 25, anesthesia with imaging on day 40, and intraperitoneal injecti…
48	48.1	Lofgren, Jennifer L. S., Susan E. Erdman, Christine Hewes, Catrina Wong, Rebecca King, Tony E. Chavarria, Allan R. Discua, James G. Fox, and Kirk J. Maurer.	Journal of the American Association for Laboratory Animal Sciences	2012	Castration eliminates conspecific aggression in group-housed CD1 male surveillance mice (Mus musculus)	In house	Crl:CD1 (ICR)	Large - surveillance mice in 22 rooms (22x6=132 mice)	3-4 weeks (kept for max 6 month) monitored for 3 months before implementing castration program and 3 months thereafter	Male	6 (2 mice removed every 2 month without replacement)	Not mentioned, most likely non-sibling	Not mentioned	Polycarbonate microisolation cages with filter tops (48,3 x 26,6 x 15,24 cm)	Once weekly (obs! dirty bedding from surronding cages)	Hard-wood bedding AND nesting pads AND polyvinyl chloride tubes OR red plastic igloos (or both)	Home cage behaviour or wounds - both if noted during normal husbandry				Yes	Castration	Between	N/a	Decreased aggression in castrated mice as compared to intact	Prevalence of fighting in intact male surveillance mice 22 rooms contained male surveillance mice, 50% of which were fighting; 9% of the cages with male mice that fought had to be separated, and 27% required both separation and euthanasia of mice due to the severity of their wounds. Over the following 3-mo period, the overall prevalence of fighting in cages housing intact male mice was 64% (14 of…	Surveillance Mice = non study situation
49	49.1	Van Loo, P. L. P., Cljj Kruitwagen, J. M. Koolhaas, H. A. Van de Weerd, L. F. M. Van Zutphen, and V. Baumans.	Applied Animal Behaviour Science	2002	Influence of cage enrichment on aggressive behaviour and physiological parameters in male mice	Not mentioned	BALB/cAnNCRLBr	45	7 weeks at start of experiment, continues to 18 weeks	Male	3	Non-sibling	Not mentioned	Open cage: Wire topped Makrolon II	Once weekly	Treatment: Control (sawdust only) OR Kleenex OR Utrecht Shelter	Home cage behaviour after cage cleaning	Home cage behaviour after disturbance	Wound count		Yes	Enrichment	Within	Yes	Decreased aggression with nesting material as compared to control	Behaviour after cage chagnge: Contrast results show that nesting material overall reduced agnostic behaviour compared to control housing. Behaviour after disturbance: Similar results as behviour after cage cleaning, however, less pronounced. Wounds: Number of wounds in nest housing was significantly lower than in shelter housing, while control housing was intermediate.	The shelter is a rigid, unmanipulative enrichment item while nesting material can be manipulated and thus may provide a certain degree of control over the environment - Stress reduction!
49	49.2	Van Loo, P. L. P., Cljj Kruitwagen, J. M. Koolhaas, H. A. Van de Weerd, L. F. M. Van Zutphen, and V. Baumans.	Applied Animal Behaviour Science	2002	Influence of cage enrichment on aggressive behaviour and physiological parameters in male mice	Not mentioned	BALB/cAnNCRLBr	45	7 weeks at start of experiment, continues to 18 weeks	Male	3	Non-sibling	Not mentioned	Open cage: Wire topped Makrolon II	Once weekly	Treatment: Control (sawdust only) OR Kleenex OR Utrecht Shelter	Home cage behaviour after cage cleaning	Home cage behaviour after disturbance	Wound count		Yes	Enrichment	Within	Yes	Increased aggression with shelter as enrichment as compared to control	Behaviour after cage chagnge: The Utrecht Shelter housing overall increased agnostic behavior. Behaviour after disturbance: Similar results as behviour after cage cleaning, however, less pronounced. Wounds: Number of wounds in nest housing was significantly lower than in shelter housing, while control housing was intermediate.	The shelter is a rigid, unmanipulative enrichment item while nesting material can be manipulated and thus may provide a certain degree of control over the environment - Stress reduction!
49	49.3	Van Loo, P. L. P., Cljj Kruitwagen, J. M. Koolhaas, H. A. Van de Weerd, L. F. M. Van Zutphen, and V. Baumans.	Applied Animal Behaviour Science	2002	Influence of cage enrichment on aggressive behaviour and physiological parameters in male mice	Not mentioned	BALB/cAnNCRLBr	45	7 weeks at start of experiment, continues to 18 weeks	Male	3	Non-sibling	Not mentioned	Open cage: Wire topped Makrolon II	Once weekly	Control (sawdust only) OR Kleenex OR Utrecht Shelter	Home cage behaviour after cage cleaning	Home cage behaviour after disturbance	Wound count		Yes	Age	Within	No	Increased aggression with increasing age	There was a clear overall increase in agonistic behaviour with increasing age, while latency until first agonistic encounter decreases with age. When the mice were 7-12 weeks old, would count was quie high, then decreased when the mice were 13-15 weeks old and started to increase again when mice werer 16-18 weeks old.	From discussion: It can be argued that in the newly formed groups at the start of the experiment male mice fought overtly to establish dominance hierarkies. Afternthese had been established males lived in relatively stable environments for a while. As mice matured aggression increased again possibly because dominant males were challenged regularly.
50	50.1	Howerton, C. L., J. P. Garner, and J. A. Mench.	Applied Animal Behaviour Science	2008	Effects of a running wheel-igloo enrichment on aggression, hierarchy linearity, and stereotypy in group-housed male CD-1 (ICR) mice	In house	CD-1 (ICR)	60 (n=20/group)	Weaning and grouping on day 19-24, 60 days of age at first data collection, 74 days of age second collection	Male	5	Sibling	Grouped at weaning	Open cage	Not mentioned	Paper beddingand paper chips (CONTROL) + Igloo with running wheel (WHEEL) + Glued wheel (FIXED)	Home cage behaviour	Tube test for social domiance			Yes	Enrichment	Within	No	Increased aggression after addition of igloo with running wheel	Increase in escalated aggression between PRE and POST in WHEEL. There was a significant effect of the addition of running wheels and shelters on the behaviourand dominance hierarchies of group-housed male CD-1 laboratory mice. Escalated aggression increased, and dominance hierarchy linearity decreased, in cages supplied with both wheel/shelter combinations. There was also a decrease in stereotypi…
50	50.2	Howerton, C. L., J. P. Garner, and J. A. Mench.	Applied Animal Behaviour Science	2008	Effects of a running wheel-igloo enrichment on aggression, hierarchy linearity, and stereotypy in group-housed male CD-1 (ICR) mice	In house	CD-1 (ICR)	60 (n=20/group)	Weaning and grouping on day 19-24, 60 days of age at first data collection, 74 days of age second collection	Male	5	Sibling	Grouped at weaning	Open cage	Not mentioned	Paper beddingand paper chips (CONTROL) + Igloo with running wheel (WHEEL) + Glued wheel (FIXED)	Home cage behaviour	Tube test for social domiance			Yes	Enrichment	Within	No	Increased aggression after addition of igloo + fixed wheel	Increase in escalated aggression between PRE and POST in WHEEL and FIXED. There was a significant effect of the addition of running wheels and shelters on the behaviourand dominance hierarchies of group-housed male CD-1 laboratory mice. Escalated aggression increased, and dominance hierarchy linearity decreased, in cages supplied with both wheel/shelter combinations. There was also a decrease in …
51	51.1	Barnard, C. J., J. M. Behnke, and J. Sewell.	Physiology & Behavior	1996	Environmental enrichment, immunocompetence, and resistance to Babesia microti in male mice	Randomly bred	CFLP	190	Weaned at 21 days, 70 days on start of experiment.	Male	3 OR 6 OR 10	Non-sibling (no 2 groups shared more than 20% of individuals from the same natal litters.)	Mice were weaned at 21 days postpartum, separated into single-sex natal litters, and maintained in their natal litters until 24 h before being assigned to experimental groups as adults at 70 days of age. Twenty-four hours before grouping, males were separated, and housed singly to standardize their social experience immediately prior to group establishment.	Open cage (30x60x30) plywood and glass observational cage	Not mentioned	In enriched condition: Four perpex shelves and two perpex nest boxes. Control animals in Barnard et al (1994)	Home cage aggression				Yes	Enrichment	Between	N/a	Increased aggression in enriched cages as compared to standard	There was also a significant independent effect of housing condition (F’( 1,107) = 6.59, p< 0.02), with aggression being greater when shelves and nestboxes were provided (Fig. 1).	Control animals are in a seperate experiment. (Barnard 1994 Parasitology) Only included data before injection (pre-grouping).
51	51.2	Barnard, C. J., J. M. Behnke, and J. Sewell.	Physiology & Behavior	1996	Environmental enrichment, immunocompetence, and resistance to Babesia microti in male mice	Randomly bred	CFLP	190	Weaned at 21 days, 70 days on start of experiment.	Male	3 OR 6 OR 10	Non-sibling (no 2 groups shared more than 20% of individuals from the same natal litters.)	Mice were weaned at 21 days postpartum, separated into single-sex natal litters, and maintained in their natal litters until 24 h before being assigned to experimental groups as adults at 70 days of age. Twenty-four hours before grouping, males were separated, and housed singly to standardize their social experience immediately prior to group establishment.	Open cage (30x60x30) plywood and glass observational cage	Not mentioned	In enriched condition: Four perpex shelves and two perpex nest boxes. Control animals in Barnard et al (1994)	Home cage aggression				Yes	Group size	Between	N/a	Increased aggression with decreasing group size	the significant effect of group size found by Barnard et al. (2) (aggression per individual increasing with decreasing group size) was maintained across housing conditions here (F(2,107) = 7.37, p < 0.01). There was some interaction between group size and rank category (F(2,107) = 2.49,0.1> p > 0.05), with the tendency for high-rank mice to show a greater decline in aggression with increasing gro…	Only included data before injection (pre-grouping).
52	52.1	Barnard, C. J., J. M. Behnke, and J. Sewell.	Parasitology	1994	Social behaviour and susceptibility to infection in house mice (Mus musculus): effects of group size, aggressive behaviour and status-related hormonal responses prior to infection on resistance to Babesia microti	Randomly bred	CFLP	190 (10 replicates of each group size)	Weaned at 21 days, 70 days on start of experiment.	Male	3 OR 6 OR 10	Non-sibling (no 2 groups shared more than 20% of individuals from the same natal litters.)	Mice were weaned at 21 days postpartum, separated into single-sex natal litters, and maintained in their natal litters until 24 h before being assigned to experimental groups as adults at 70 days of age. Twenty-four hours before grouping, males were separated, and housed singly to standardize their social experience immediately prior to group establishment.	Open cage (30x60x30) plywood and glass observational cage	Not mentioned	Not mentioned	Home cage aggression				Yes	Group size	Between	N/a	Decreased aggression with increasing group size	The rate of attack initiation decreased significantly with increasing group size
53	53.1	Gaskill, Brianna N., Aurora M. Stottler, Joseph P. Garner, Christina W. Winnicker, Guy B. Mulder, and Kathleen R. Pritchett-Corning.	Lab Animal	2017	The effect of early life experience, environment, and genetic factors on spontaneous home-cage aggression-related wounding in male C57BL/6 mice	Charles river	C57BL/6NCrl	360	Arrived at facility at 7 weeks, assigned to treatmens and studied untill 9 weeks, then euthanized and scored for PALS (weaning at different time points from 14, 21 or 28 days)	Male	5 * (see housing before grouping)	Non-sibling	Weaned mice were housed in groups of 30, with 4 cages of 30 mice per weaning group for a total of 360 mice identified as being on study. After weaning, mice were either held in stable groupsor mixed between study cages of the same wean age weekly at cage change, for either 3, 4, or 5 weeks, depending on age at weaning. At the time of shipment, mice on study were packed at densities of 30 per crat…	IVC (37.3 × 23.4 × 14.0 cm) disposible	Forthnight	aspen shavings	PALS *					Weaning age	Between	N/a	Increased aggression with increasing weaning age	A positive linear trend was found (P < 0.05) where 14 day old pups had the lowest weighted PALS and the 28 day old pups had the highest scores	* PALS - Pelt Aggression Lesion Score = injuries studied after euthanazia
53	53.2	Gaskill, Brianna N., Aurora M. Stottler, Joseph P. Garner, Christina W. Winnicker, Guy B. Mulder, and Kathleen R. Pritchett-Corning.	Lab Animal	2017	The effect of early life experience, environment, and genetic factors on spontaneous home-cage aggression-related wounding in male C57BL/6 mice	Charles river	C57BL/6NCrl	360	Arrived at facility at 7 weeks, assigned to treatmens and studied untill 9 weeks, then euthanized and scored for PALS (weaning at different time points from 14, 21 or 28 days)	Male	5 * (see housing before grouping)	Non-sibling	Weaned mice were housed in groups of 30, with 4 cages of 30 mice per weaning group for a total of 360 mice identified as being on study.After weaning, mice were either held in stable groupsor mixed between study cages of the same wean age weekly at cage change, for either 3, 4, or 5 weeks, depending on age at weaning. At the time of shipment, mice on study were packed at densities of 30 per crate…	IVC (37.3 × 23.4 × 14.0 cm) disposible	Forthnight	aspen shavings	PALS *					Changing groups (stable or mixed)	Between	N/a	No effect	Stability of the weaning group did not significantly explain variation in PALS (GLM: F1,30 = 0.18; P = 0.67; Fig. 2). Post-weaning housing of mice either being mixed weekly at cage change to combine pups of similar weight or kept in stable groups until shipment at 7 weeks of age.	* PALS - Pelt Aggression Lesion Score = injuries studied after euthanazia
53	53.3	Gaskill, Brianna N., Aurora M. Stottler, Joseph P. Garner, Christina W. Winnicker, Guy B. Mulder, and Kathleen R. Pritchett-Corning.	Lab Animal	2017	The effect of early life experience, environment, and genetic factors on spontaneous home-cage aggression-related wounding in male C57BL/6 mice	Charles river	C57BL/6NCrl	400 (n=10 cages/group)	Arrived at facility at 7 weeks, assigned to treatmens and studied untill 9 weeks, then euthanized and scored for PALS	Male	5	Non-sibling		IVC (37.3 × 23.4 × 14.0 cm) disposible	Forthnight	aspen shavings (as) OR as + nesting material OR as + sunflower seeds OR as + a red pet hut	PALS *					Enrichment	Between	N/a	No effect	The enrichment tested did not significantly alter PALS (GLM: F1,69 = 2.5; P = 0.07; Fig. 4).	* PALS - Pelt Aggression Lesion Score = injuries studied after euthanazia. Time on study unsurprisingly altered wound severity as measured by PALS (GLM: F1,69 = 37.8; P < 0.001), since 33 out of the total 80 cages had to be euthanized due to severe aggression before the end of the 2 weeks. Not stating from which groups!
53	53.4	Gaskill, Brianna N., Aurora M. Stottler, Joseph P. Garner, Christina W. Winnicker, Guy B. Mulder, and Kathleen R. Pritchett-Corning.	Lab Animal	2017	The effect of early life experience, environment, and genetic factors on spontaneous home-cage aggression-related wounding in male C57BL/6 mice	Charles river	C57BL/6NCrl	400 (n=10 cages/group)	Arrived at facility at 7 weeks, assigned to treatmens and studied untill 9 weeks, then euthanized and scored for PALS	Male	5	Non-sibling		IVC (37.3 × 23.4 × 14.0 cm) disposible	Forthnight	aspen shavings (as) OR as + sunflower seeds	PALS *					Enrichment	Between	N/a	No effect	The enrichment tested did not significantly alter PALS (GLM: F1,69 = 2.5; P = 0.07; Fig. 4).	* PALS - Pelt Aggression Lesion Score = injuries studied after euthanazia. Time on study unsurprisingly altered wound severity as measured by PALS (GLM: F1,69 = 37.8; P < 0.001), since 33 out of the total 80 cages had to be euthanized due to severe aggression before the end of the 2 weeks. Not stating from which groups!
53	53.5	Gaskill, Brianna N., Aurora M. Stottler, Joseph P. Garner, Christina W. Winnicker, Guy B. Mulder, and Kathleen R. Pritchett-Corning.	Lab Animal	2017	The effect of early life experience, environment, and genetic factors on spontaneous home-cage aggression-related wounding in male C57BL/6 mice	Charles river	C57BL/6NCrl	400 (n=10 cages/group)	Arrived at facility at 7 weeks, assigned to treatmens and studied untill 9 weeks, then euthanized and scored for PALS	Male	5	Non-sibling		IVC (37.3 × 23.4 × 14.0 cm) disposible	Forthnight	aspen shavings (as) OR as + a red pet hut	PALS *					Enrichment	Between	N/a	No effect	The enrichment tested did not significantly alter PALS (GLM: F1,69 = 2.5; P = 0.07; Fig. 4).	* PALS - Pelt Aggression Lesion Score = injuries studied after euthanazia. Time on study unsurprisingly altered wound severity as measured by PALS (GLM: F1,69 = 37.8; P < 0.001), since 33 out of the total 80 cages had to be euthanized due to severe aggression before the end of the 2 weeks. Not stating from which groups!
53	53.6	Gaskill, Brianna N., Aurora M. Stottler, Joseph P. Garner, Christina W. Winnicker, Guy B. Mulder, and Kathleen R. Pritchett-Corning.	Lab Animal	2017	The effect of early life experience, environment, and genetic factors on spontaneous home-cage aggression-related wounding in male C57BL/6 mice	Charles river	C57BL/6NCrl	400 (n=10 cages/group)	Arrived at facility at 7 weeks, assigned to treatmens and studied untill 9 weeks, then euthanized and scored for PALS	Male	5	Non-sibling		IVC (37.3 × 23.4 × 14.0 cm) disposible	Forthnight	aspen shavings (as) OR as + a red pet hut	PALS *					Location	Between	N/a	No difference in aggression depending on location within the rack	The rack on which the cage was placed, but not the location on an individual rack, was also found to significantly affect PALS (GLM: F1,69 = 4.4; P = 0.04), with animals on one rack having a higher PALS.	* PALS - Pelt Aggression Lesion Score = injuries studied after euthanazia.
53	53.7	Gaskill, Brianna N., Aurora M. Stottler, Joseph P. Garner, Christina W. Winnicker, Guy B. Mulder, and Kathleen R. Pritchett-Corning.	Lab Animal	2017	The effect of early life experience, environment, and genetic factors on spontaneous home-cage aggression-related wounding in male C57BL/6 mice	Charles river	C57BL/6NCrl	400 (n=20 cages/group)	Arrived at facility at 7 weeks, assigned to treatmens and studied untill 9 weeks, then euthanized and scored for PALS	Male	5	Non-sibling		IVC (37.3 × 23.4 × 14.0 cm) disposible	Forthnight	aspen shavings (as) OR as + nesting material OR as + sunflower seeds OR as + a red pet hut (all with or without lavendel oil)	PALS *					Scent (lavender)	Between	N/a	Increase aggression in lavender scented cages	Cages treated with lavenderhad significantly higher PALS.	* PALS - Pelt Aggression Lesion Score = injuries studied after euthanazia
53	53.8	Gaskill, Brianna N., Aurora M. Stottler, Joseph P. Garner, Christina W. Winnicker, Guy B. Mulder, and Kathleen R. Pritchett-Corning.	Lab Animal	2017	The effect of early life experience, environment, and genetic factors on spontaneous home-cage aggression-related wounding in male C57BL/6 mice	Charles river OR Taconic OR The Jackson Laboratories OR the National Cancer Institute OR Harlan Laboratories	C57BL/6NCrl, C57BL/6NTac, C57BL/6J, C57BL/6NJ, C57BL/6N, C57BL6/NHsd	300 (n= 10 cages/strain)	Arrived at facility at 7 weeks, assigned to treatmens and studied untill 9 weeks, then euthanized and scored for PALS	Male	5	Non-sibling		IVC (37.3 × 23.4 × 14.0 cm) disposible	Forthnight	aspen shavings	PALS *					substrain	Between	N/a	no effect	The substrains of B6 tested was not found to be significantly different	* PALS - Pelt Aggression Lesion Score = injuries studied after euthanazia
53	53.9	Gaskill, Brianna N., Aurora M. Stottler, Joseph P. Garner, Christina W. Winnicker, Guy B. Mulder, and Kathleen R. Pritchett-Corning.	Lab Animal	2017	The effect of early life experience, environment, and genetic factors on spontaneous home-cage aggression-related wounding in male C57BL/6 mice	Charles river OR Taconic OR The Jackson Laboratories OR the National Cancer Institute OR Harlan Laboratories	C57BL/6NCrl, C57BL/6NTac, C57BL/6J, C57BL/6NJ, C57BL/6N, C57BL6/NHsd	300 (n= 30 cages/identificationmethod --> 5 cages/strain)	Arrived at facility at 7 weeks, assigned to treatmens and studied untill 9 weeks, then euthanized and scored for PALS	Male	5	Non-sibling		IVC (37.3 × 23.4 × 14.0 cm) disposible	Forthnight	aspen shavings	PALS *					identification method	Between	N/a	Increase aggression in ear notched mice as compared to tail tattoo	Mice that received a tail tattoo had significantly lower PALS than those that were ear notched.	* PALS - Pelt Aggression Lesion Score = injuries studied after euthanazia
53	53.10	Gaskill, Brianna N., Aurora M. Stottler, Joseph P. Garner, Christina W. Winnicker, Guy B. Mulder, and Kathleen R. Pritchett-Corning.	Lab Animal	2017	The effect of early life experience, environment, and genetic factors on spontaneous home-cage aggression-related wounding in male C57BL/6 mice	Charles river	C57BL/6NCrl	400 (n=10 cages/group)	Arrived at facility at 7 weeks, assigned to treatmens and studied untill 9 weeks, then euthanized and scored for PALS	Male	5	Non-sibling		IVC (37.3 × 23.4 × 14.0 cm) disposible	Forthnight	aspen shavings (as) OR as + a red pet hut	PALS *					Location	Between	N/a	Increased aggression in one rack compared to another	The rack on which the cage was placed, but not the location on an individual rack, was also found to significantly affect PALS (GLM: F1,69 = 4.4; P = 0.04), with animals on one rack having a higher PALS.	* PALS - Pelt Aggression Lesion Score = injuries studied after euthanazia.
54	54.1	Rodriguez-Arias, Marta, Francisco Navarrete, M. Carmen Blanco-Gandia, M. Carmen Arenas, Maria A. Aguilar, Adrian Bartoll-Andres, Olga Valverde, Jose Minarro, and Jorge Manzanares.	Psychopharmacology	2015	Role of CB2 receptors in social and aggressive behavior in male mice	In-house	CB2KO in C57BL/6J background backcrossed 8 generations to outbreed CD-1	24? Not clearly stated	42 days at start of experiment, kept for 3 weeks then performed social interaction test	male	4	Not mentioned	Not mentioned	open cage (25×25× 14.5 cm)	Not mentioned	Not mentioned	Social interaction test (standard oponent in neutral cage)				Yes	Strain KO	Between	N/a	Increased aggression in KO-mice as compared to WT	Group-housed CB2KO mice spent more time in threat and attack, engaged in longer episodes of threat and attack, and performed a higher number of attacks than group-housed WT mice
55	55.1	McQuaid, Robyn J., Marie-Claude Audet, Shlomit Jacobson-Pick, and Hymie Anisman.	International Journal of Neuropsychopharmacology	2013	The differential impact of social defeat on mice living in isolation or groups in an enriched environment: plasma corticosterone and monoamine variations	Jackson Laboratory, USA	BALB/cByJ	53	6-8 weeks (arrival) 4 weeks of observations	Male	3	Not mentioned	Not mentioned	Open cage (SE: 27x21x14 cm, EE: 50r40r20 cm))	Once weekly does not change the enrichment items	SE: one cotton nestl, EE: 2 running wheels + one red polypropylene shelter + one orange polypropylene shelter with an angled running wheel +three yellow polypropylene tunnels + two cotton nestlets	Home cage behaviour scored 5min on 3 days/week for 4 weeks	Observation of wounds	Social defeat - put on cage of retiered breeder		Yes	Enrichment	Between	N/a	No effect on aggression in home cage or wounding. Increased aggression in mice from standard cages in social defeat test.	As expected, aggression levels were generally low in BALB/cByJ mice. In fact, of the 53 group-housed mice of expts 1 and 2, only one EE mouse was removed from the study for displaying overly aggressive behaviours (defined as continuous attacking so that injury had occurred) and very few aggressive encounters were witnessed during the 5-min/cage scoring sessions. Nevertheless, even among this rela…	This does not imply that social conditions were not disrupted among enriched BALB/cByJ mice housed in groups, but simply points to the limited aggression that occurs in this strain. It is possible that the current method of enrichment, which did not include changing items weekly, might have enhanced territorial behaviours, thus contributing to the anxiogenic effects observed among the enriched an…
56	56.1	McQuaid, Robyn Jane, Roderick Dunn, Shlomit Jacobson-Pick, Hymie Anisman,and Marie-Claude Audet.	Frontiers in Behavioural Neuroscience	2018	Post-weaning Environmental Enrichment in Male CD-1 Mice: Impact on Social Behaviors, Corticosterone Levels and Prefrontal Cytokine Expression in Adulthood	In house (parent stock Charles River, Canada)	CD-1	69	Weaning 21 days, directly to experimental housing and studied for 6 weeks	Male	3	Sibling	Immediately after weaning at postnatal day (PD) 21, male mice were housed with their siblings (3/cage) for 6 weeks in a standard (SE; n = 36) or an enriched (EE; n = 33) environment.	Open cage (SE: 27x21x14 cm, EE: 50r40r20 cm))	Twice a week for SE once weekly for EE	SE: ne cotton nestl, EE: running wheels + one red polypropylene shelter + one orange polypropylene shelter with an angled running wheel +three yellow polypropylene tunnels + two cotton nestlets	Home cage behaviour after cage cleaning	Wounding			Yes	Enrichment (enriched or superenriched)	Between	N/a	Increased aggression in EE as compared to SE - NOTE only in wounding assay, no difference in other measures of homecage aggression	By the end of Week 5, three EE mice had been removed, all from separate cages, but no SE mice had to be eliminated. Fights, F.1,10/ = 3.54, p = 0.089, were marginally more frequent among SE mice than EE mice, but this difference did not reach significance. As well, aggressive chases appear to be more frequent among SE mice, but this was exceptionally variable over the 6-week housing and the diffe…	Effect on wounding but not significans or trends in any other assay. l Different size cage for standard and enrichment and also difference in cage change (S: twice weekly, EE: once weekly). The numbers are mean over 6 weeks!
57	57.1	O’Donnell, V., R. J. Blanchard, and D. C. Blanchard.	Behavioral and Neural Biology	1981	Mouse aggression increases after 24 hours of isolation or housing with females	In house derived from Simonsen Laboratories stock	Swiss-Webster	60 (10 burar i varje housing condition, 3 möss per bur)	Average of 78 days of age at start of experiment, in experiment groups for 1 day thereafter tested in GI test every 4th day for 4 test days	Male	3	Treatment: Sibling and non-sibling groups used	Housed from weaning untill start of experiment in same sex littermate groups	Open cage: 38x32.5x26.4 cm	Not mentioned	Wood shavings	Group intruder test				Yes	Group composition	Between	N/a	No difference in aggression in littermate or non-littermate groups	Outcome from data in fig 1	For the multimale groups, only the bite and attack duration scores of the most aggressive male in each colony were used. Article included beacuse of litter groups and non-litter groups as controls. Statistics only for difference between single/female and group.
57	57.2	O’Donnell, V., R. J. Blanchard, and D. C. Blanchard.	Behavioral and Neural Biology	1981	Mouse aggression increases after 24 hours of isolation or housing with females	In house derived from Simonsen Laboratories stock	Swiss-Webster	60 (10 burar i varje housing condition, 3 möss per bur)	Average of 78 days of age at start of experiment, in experiment groups for 1 day thereafter tested in GI test every 4th day for 4 test days	Male	3	Treatment: Sibling and non-sibling groups used	Housed from weaning untill start of experiment in same sex littermate groups	Open cage: 38x32.5x26.4 cm	Not mentioned	Wood shavings	Group intruder test				Yes	Time	Within	No	No difference with time	No difference seen in aggressive behaviour over time for either littermate or non-littermate group. :"There was no significant effect for trials or trial-housing interaction". .	For the multimale groups, only the bite and attack duration scores of the most aggressive male in each colony were used. Article included beacuse of litter groups and non-litter groups as controls. Statistics only for difference between single/female and group.
58	58.1	Trainor, B. C., J. L. Workman, R. Jessen, and R. J. Nelson.	Behavioral Neuroscience	2007	Impaired Nitric Oxide Synthase Signaling Dissociates Social Investigation and Aggression	Jackson Labs, Bar Harbor, ME	nNOS KO on a C57B6 × 129S background	12	Not mentioned	Male	2	Not mentioned	Not mentioned	Not mentioned	Not mentioned	Not mentioned	Descriptive observation				Yes	Strain KO	Between	No	No effect	All pair-housed animals were assessed for wounding before behavioral tests; we observed no wounds in any pair-housed WT or nNOS −/− mice.
59	59.1	Lee, Won, Amber Khan, och James P. Curley.	Proc. R. Soc. B Proceedings the Royal Society Publishing Biology	2017	Major urinary protein levels are associated with social status and context in mouse social hierarchies	Charles River Laboratories (Wilmington, MA, USA)	CD1	70	7 weeks when purchased, housed in pairs for 11-15 days then housed in social groups of 11-12 unfamiliar males for 20-21 days	Male	2 then 11-12	Non-sibling in the social group	First pair-housed and then introduced to big groupings in vivarium	As pairs housed in standard cages 27x17x12cm social housing in vivaria 150x80x220cm	Not mentioned	Pine shaving as bedding in pair housing, in the vivaria an upper level with multiple shelves and a lower level with five nest-boxes connected by tubes. Mice could access each level of the vivariumvia a systemof ramps and tunnels.	Descriptive observation				Yes	Changing groups	Within	No	No severe aggression observed	We monitored if any individual exhibited a sign of pain or injury every day during the pair and grouphousing periods. As we expected heightened aggression on the first day of grouphousing because they engage in aggressive interactions to establish social hierarchy, we monitored animals more frequently on grouphousing day (GD) 1/2. There was no animal that had a severe wound and we did not need to…	The social context of a social hierarchy is dramatically different from that of dyads. In a dyad, animals that are dominant will rarely exhibit subordinate behaviours and animals that are subordinate will rarely exhibit aggressive behaviour. Conversely, in a social hierarchy with multiple relationships, animals have to flexibly switch between aggressive and subordinate behaviours with only the al…
60	60.1	Svare, B. B., and A. I. Leshner.	Journal of Comparative and Physiological Psychology	1973	Behavioral Correlates of Intermale Aggression and Grouping in Mice	Sprague-Dawley	Albino mice bought from Sprague-Dawley	72	10 weeks at behavioural testing, housed for 7 weeks and then test)	Male	1 or 6	Not mentioned	At arrival housed in experimental groups for 7 weeks before testing	Open cage (17.8 X 17.8 X 24.1 cm)	Not mentioned	Not mentioned	Resident-intruder 3 times with 24h inbetween				Yes	Time	Within	No	No difference in aggression over the 3 days	While the group-housed animals' low level of aggressiveness did not change over days, but remained relatively stable.
61	61.1	Martinez-Cue, Carmen, Noemi Rueda, Eva Garcia, Muriel T. Davisson, Cecilia Schmidt, and Jesus Florez.	Behavioural Brain Research	2005	Behavioral, cognitive and biochemical responses to different environmental conditions in male Ts65Dn mice, a model of Down syndrome	In house (TS females and B6EiC3HF1male breeders The Jackson Laboratory)	Ts65Dn trisomic and disomic controls from same litter	112	Weaning day 22, housed for 7 weeks in experimental conditions	Male	2-3 or 8-10	Not mentioned	Weaned on day 22 then into experimental housing	Open cage: for standard housing 20 cm×22 cm×20 cm OR social housing 42 cm× 50 cm×20 cm.	Not mentioned	Enriched standard housing: Different shape, color, texture and odor toys were introduced in the cage, the bedding material was also changed: wood shavings, stones, newspaper or cellulose, cotton, sand, etc. Difficulties to reach the food were progressively increased; food was hidden under the bedding material, wrapped with aluminum paper, located in paperboxes, etc. Carewas taken that animals fou…	Resident-intruder				Yes	Strain	Between	N/a	Decreased aggression in trisomic mice as compared to disomic control	There was no significant difference in the number of attacks that TS and CO mice received from an intruder in a neutral arena under any of the environmental treatments [F(7,107) = 0.18, n.s.] (Fig. 2). However, the different groups of male mice differed in the number of attacks performed to the intruder [F(7,107) = 2.71, P < 0.05], the trisomy being the main factor responsible for this difference…	The effect was only significant in the enriched conditions (small and large group).
62	62.1	McNamara, G. I., R. M. John, and A. R. Isles.	Frontiers in Behavioural Neuroscience	2018	Territorial Behavior and Social Stability in the Mouse Require Correct Expression of Imprinted Cdkn1c	Not mentioned	Cdkn1cBACx1 and Cdkn1cBACLacZ + WT the former is overexpressing Cdkn1c and the later have wt expression level	48	Weaned at 3-4 weeks then into experimental groups, testing began at age 8-12 weeks	Male	3-5	Not mentioned	Weaned at 3-4 weeks then into experimental groups	Not mentioned	Not mentioned, only that: For analysis of within-cage measures of dominance, bedding was unchanged for the duration of each task but was changed between each task to allow for a more representative indication of rank stability over time.	Not mentioned	Home cage observation				Yes	Strain	Between	N/a	Increased aggression in cages with Cdkn1c overexpressing mice and their wt cagemates	We observed significantly more signs of severe in-cage fighting (fresh cuts along flanks or in ano-genital region observed on at least one occasion) in cages containing animals overexpressing Cdkn1c and their WT cage-mates (42% of animals, n = 50) compared to cages of Cdkn1cBAClacZ animals and their WT cagemates (no observed occurrences, n = 56) and cages containing only WT litter-mates of Cdkn1c…
63	63.1	Leduc, R. Y. M., G. Rauw, G. B. Baker, and H. E. McDermid.	Journal of the American Association for Laboratory Animal Science	2017	What Goes around Can Come around: An Unexpected Deleterious Effect of Using Mouse Running Wheels for Environmental Enrichment	In house	FVB;129-Arhgap19Gt(YHD020)Byg/Hemc	75 (enligt fig 2b har tagit totalt minus ensamhållna)	Tested from 3 weeks until 3 months	Male	2 to 5	Sibling (with their littermates in groups of 2 to 5, depending on the number of littermates)	Housed from weaning in standard or enriched housing	IVC (31,8x16,5x12,7cm)		aspen chips, cotton fiber squares ST: Cardboard house. EE:Igloo style running wheel.	Homecage observations (seperation of fighting mice)				Yes	Enrichment (Running wheel)	Between	N/a	Increased aggression with running wheel	A large proportion of socially housed FVB;129/Hemc male mice exposed to running wheels required separation due to fighting within a cage, as compared with all other males from all other lines in our colony, both with and without wheels. Among groups of 2 to 5 male mice, 72.1% (44 of 61) of socially housed male mice with running wheels were in cages where fighting was noted, compared with none of …	Strain specific (however this is not part of the study): In addition, cages of male FVB;129/Hemc group-housed with wheels showed an increase in exposure to fighting, unlike other mouse strains with or without wheels (Balb/c with and without Cecr2, Smarca 1, or Arhgap19 mutations; FVB/N with and without Cecr2 mutations; and C57BL/6J with and without Smarca5 mutation)
64	64.1	Rodriguez-Arias, Marta, Francisco Navarrete, Manuel Daza-Losada, Daniela Navarro, Maria A. Aguilar, Pere Berbel, Jose Minarro, and Jorge Manzanares.	Neuropharmacology	2013	CB1 cannabinoid receptor-mediated aggressive behavior	In house	CD-1(CB1KO)	118 (49KO 69WT) (half is single housed)	42 days at start	Male	4? (only find it described for exp 2 which is not included here)	Sibling (littermates)	Not specified	Open cage (only mentioned for ind. Housed)	Not mentioned	Not mentioned	Social encounter (standard opponent)				Yes	Strain (KO)	Between	N/a	Increased aggression in KO	Group-housed CB1KO mice spent more time engaged in Attack behavior (F(1,78) ¼ 3.515; p < 0.05) (Fig. 1) and devoted more time to each attack (Unit of Attack) (F(1,78) ¼ 22.754; p < 0.001) than grouped WT mice (p < 0.05 and p < 0.001, respectively).	For the first experiment, half of the experimental animals were individually housed for 28 days in transparent plastic cages (24  13.5  13 cm). For the second experiment, 32 mice were housed in isolation under the same experimental conditions as in the first study. The remaining animals were housed in groups of four to be used as standard opponents or saline-treated grouped mice.
65	65.1	Garris, David R.	Brain Research	2003	Aggression-associated changes in murine olfactory tubercle bioamines	Charles river	CD-1	Not mentioned	Not mentioned	Male	5	Not mentioned	Housed in experimental groups for at least 21 days prior to studies	Size: (45x20x12)	Not mentioned	Not mentioned	Wound count				No	Age/time			No aggression observed until day 28 after sham surgery when 10% of the mice had wounds on the head.	Sham operated mice showed no bodylesions on head, tail or body until day 28 after surgery when 10% of mice had head leasions but none on tail or body. Compared to olfactory bulbectomized mice - which are "done" to induce aggression, this is a very low level of wounding. These mice have high levels of wounding already on day 7 post surgery when 88% has wounds on the tail and by day 28 25% has woun…
66	66.1	Williamson, Cait M. Romeo, Russell D. and Curley, James P.	Hormones and Behavior	2017	Dynamic changes in social dominance and mPOA GnRH expression in male mice following social opportunity	Charles River Laboratories	CD1	12	Obtained at 6 weeks of age, kept 3 by 3 in standard cages for 3 weeks then grouped all 12 in large vivarium and observed for 40 days	Male	12	Non-sibling	Delivered at 7 weeks, housed 3 by 3 for 3 weeks then housed all 12 togehter for the experiment (kan ej hitta 6 weeks)	Large vivarium: length 150 cm, height 80 cm, width 80 cm	Not mentioned	Upper level consisting of multiple shelves covered in pine bedding and a lower level consisting of a series of nestboxes filled with pine bedding connected by tubes. Mice can access all levels of the vivariumvia a systemof ramps and tunnels. Standard chow and water were provided ad libitumat the top of the vivarium, encouragingmovement and exploration of all the shelves.	Home cage behaviour				Yes	Removal of alpha male: removals occurred on Days 8, 12, 15, 19, 22, 26, 29, 33, 36, and 40, and observations were conducted following each alpha removal and on all days in between removals.	Within	No	Increased aggression from subdominant males rising to dominance upon removal of alpha male	Following each of the 10 removals of themost dominant alpha male from the social group, the next most socially dominant male ascended to become the new alpha male within one day. All rising subdominantmales showed a significant increase in their daily relative share of aggressive behaviors in the hierarchy on the day of alpha removal compared to the day prior to alpha removal.	In the current study, we show that removing an alpha male mouse from a social hierarchyleads to a rapid increase in aggression and a subsequent ascent to alpha status by the most subdominant male. This is a robust effect that occurred following every single removal of alpha males regardless ofwhether the group consisted of asmany as 12 individuals or as fewas 3 individuals in the social group. Su…
66	66.2	Williamson, Cait M. Romeo, Russell D. and Curley, James P.	Hormones and Behavior	2017	Dynamic changes in social dominance and mPOA GnRH expression in male mice following social opportunity	Charles River Laboratories	CD1	96	Obtained at 7 weeks of age, kept 3 by 3 in standard cages for 2 weeks then grouped 12 by 12 in large vivarium	Male	12	Non-sibling	Delivered at 7 weeks, housed 3 by 3 for 2 weeks then housed all 12 togehter for the experiment	Large vivarium: length 150 cm, height 80 cm, width 80 cm	Not mentioned	Upper level consisting of multiple shelves covered in pine bedding and a lower level consisting of a series of nestboxes filled with pine bedding connected by tubes. Mice can access all levels of the vivariumvia a systemof ramps and tunnels. Standard chow and water were provided ad libitumat the top of the vivarium, encouragingmovement and exploration of all the shelves.	Home cage behaviour				Yes	Removal of alpha male and later also of the subdominant individual who had risen to dominant status and the most subordinate individual. This procedure was repeated at five day intervals for a total of four “removals”	Within	Yes	Increased aggression from subdominant males rising to dominance upon removal of alpha male	After each of the 16 removals of alphamales, one subdominant male clearly rapidly ascendedwithin 1 h. We compared the frequency of aggressive behavior exhibited by rising subdominant males compared to subdominantmales of the equivalent rank when the alpha male was sham-removed. A significantly higher proportion of subdominant males showed aggression within 1 h following the alpha male being remov…	In the current study, we show that removing an alpha male mouse from a social hierarchyleads to a rapid increase in aggression and a subsequent ascent to alpha status by the most subdominant male. This is a robust effect that occurred following every single removal of alpha males regardless ofwhether the group consisted of asmany as 12 individuals or as fewas 3 individuals in the social group. Su…
67	67.1	Babineau, B. A. Yang, M. Berman, R. F. and Crawley, J. N.	Physiology and Behavior	2013	Low home cage social behaviors in BTBR T+tf/J mice during juvenile development	The Jackson Laboratory (JAX, Bar) Breeding pairs Harbor, ME) Bethesda site part of paper. Breeding pairs purchased.	C57BL/6 J(B6) and BTBR T+tf/J (BTBR)	4 mice per cage and 3 cages per strain, however, they state using unisex cages but that there are both male and female cages - so do not know how many were male	Grouped at weaning PND 21, aggression studied between day 21 and 48	Male and female in separate cages	4	Cagemates were taken from two different litters (two mice from each litter)	Grouped at weaning, 21 days	Tecniplast plastic filtertop cages (15 cm × 38 cm × 12.5 cm) on ventilated racks (Bethesda site)	Not mentioned	Nestlet square and a plastic tube (Bethesda cohort)	Home cage videotaped				Yes	Strain	Between	N/a	Increased chasing in B6 as compared to BTBR - no increase in attack or aggressive groom	Significantly more chasing in B6 compared to BTBR but not more attack or aggressive groom. The aggression data is not really handeled in the text.	No comparison between sites. This is Bethesda site
67	67.2	Babineau, B. A. Yang, M. Berman, R. F. and Crawley, J. N.	Physiology and Behavior	2013	Low home cage social behaviors in BTBR T+tf/J mice during juvenile development	B6 from JAX West (Sacramento, CA) and BTBR from JAX in Bar Harbor, Maine. Breeding pairs purchased. (Davis site)	C57BL/6 J(B6) and BTBR T+tf/J (BTBR)	4 mice per cage and 3 cages per strain, however, they state using unisex cages but that there are both male and female cages - so do not know how many were male	Grouped at weaning PND 21, aggression studied between day 21 and 48	Male and female in separate cages	4	Cagemates were taken from two different litters (two mice from each litter)	Grouped at weaning, 21 days	Noldus PhenoTyper 3000 chamber (30 cm × 30 cm × 38 cm; Noldus, Leesburg, VA, USA) (Davis site)	Not mentioned	A plastic igloo (Davis cohort)	Home cage videotaped				Yes	Strain	Between	N/a	No difference in aggression	No difference seen in aggressive behaviour between the two strains	No comparison between sites. This is Davies site
68	68.1	Haemisch, A. and Gartner, K.	Journal of Experimental Animal Science	1994	The cage design affects intermale aggression in small groups of male laboratory mice: strain specific consequences on social organization, and endocrine activations in two inbred strains (DBA/2J and CBA/J)	In house for DBA/2J originally from Zentral-institut fur Versuchstierzucht, Hannover, FRG and CBA/J obtained directly from Charles River, Sulzfeld, BRD	DBA/2J and CBA/J	132 half from each strain	Approx 120 days of age when assign to experimental housing, housed in SC or EC for 1 week then for 6 weeks behavioural tests were performed one a week	Male	3	Siblings for DBA/2J, non-sibling for CBA/J	Kept with the same cagemates as in the experiment for 12 weeks before experiment start, DBA/2J with siblings from weaning 3-5 per group and reduced to 3 per group for experiment. CBA/J were delivered in groups of 20 at 21 days of age, at delivery grouped 3 by 3. Enriched group allowed to adapt to novel condition for 1 week then studied for 6 weeks.	Open cage: 825cm2 for standard housing, 790cm2 for enriched housing	Not mentioned	Standard cage: soft-wood bedding (?) mentioned for housing before experiment but this is not really stated for the experimental phase, Enriched cage: Horizontal labyrinth at the cage bottom with a plane on top. Both accessible by holes in diagonal corners.	Group intruder test	Neutral arena - group separated for 2h then re-united in a neutral cage (no labyrinth)			Yes	Strain	Between	N/a	More aggression in DBA strain as compared to CBA	DBA attackers performed more attacks than CBA attackers. Differences were significant in the intruder test under both housing conditions and in the group test in standard cage groups but were missing in the group test of enriched cage groups. No difference in number of attacking mice between the strains but the DBA attackers attack significantly more.	Due to the use of an unfamiliar cage (in the novel arena test) amounts of interactions occured relatively infrequent. Extremly low amounts of attacks were measured in the basicly low aggressive CBA in this situation. From the DBA experiments it was evident that attacks between geroup members occured immediately when the mice were reintroduced into their home cage after the test was finished. Auth…
68	68.2	Haemisch, A. and Gartner, K.	Journal of Experimental Animal Science	1994	The cage design affects intermale aggression in small groups of male laboratory mice: strain specific consequences on social organization, and endocrine activations in two inbred strains (DBA/2J and CBA/J)	In house for DBA/2J originally from Zentral-institut fur Versuchstierzucht, Hannover, FRG	DBA/2J	66	Approx 120 days of age when assign to experimental housing, housed in SC or EC for 1 week then for 6 weeks behavioural tests were performed one a week	Male	3	Siblings	Kept with the same cagemates as in the experiment for 12 weeks before experiment start, DBA/2J with siblings from weaning 3-5 per group and reduced to 3 per group for experiment. Enriched group allowed to adapt to novel condition for 1 week then studied for 6 weeks.	Open cage: 825cm2 for standard housing, 790cm2 for enriched housing	Not mentioned	Standard cage: soft-wood bedding (?) mentioned for housing before experiment but this is not really stated for the experimental phase, Enriched cage: Horizontal labyrinth at the cage bottom with a plane on top. Both accessible by holes in diagonal corners.	Group intruder test	Neutral arena - group separated for 2h then re-united in a neutral cage (no labyrinth)			Yes	Enrichment	Between	N/a	Increased aggression in enriched cages	Increased number of attackers in DBA in enriched cages. This number is taken from both GI and neutral arena tests. Attackers in enriched cages performed twice as much attacks than attackers in standard cahes - however, this was not statistically significant.	Due to the use of an unfamiliar cage (in the novel arena test) amounts of interactions occured relatively infrequent. Extremly low amounts of attacks were measured in the basicly low aggressive CBA in this situation. From the DBA experiments it was evident that attacks between geroup members occured immediately when the mice were reintroduced into their home cage after the test was finished. Auth…
68	68.3	Haemisch, A. and Gartner, K.	Journal of Experimental Animal Science	1994	The cage design affects intermale aggression in small groups of male laboratory mice: strain specific consequences on social organization, and endocrine activations in two inbred strains (DBA/2J and CBA/J)	In house for DBA/2J originally from Zentral-institut fur Versuchstierzucht, Hannover, FRG	DBA/2J	66	Approx 120 days of age when assign to experimental housing, housed in SC or EC for 1 week then for 6 weeks behavioural tests were performed one a week	Male	3	Siblings	Kept with the same cagemates as in the experiment for 12 weeks before experiment start, DBA/2J with siblings from weaning 3-5 per group and reduced to 3 per group for experiment. Enriched group allowed to adapt to novel condition for 1 week then studied for 6 weeks.	Open cage: 825cm2 for standard housing, 790cm2 for enriched housing	Not mentioned	Standard cage: soft-wood bedding (?) mentioned for housing before experiment but this is not really stated for the experimental phase, Enriched cage: Horizontal labyrinth at the cage bottom with a plane on top. Both accessible by holes in diagonal corners.	Group intruder test	Neutral arena - group separated for 2h then re-united in a neutral cage (no labyrinth)			Yes	Age	Within	No	No effect in standard cages	In the enriched cages group attack frequencies increased progressively with time that mice spent in the enriched environment. This was the case in the group intruder test for DBA. Significantly more attacks in week 5 and 6 in the enriched environment.	Here it looks like data is the opposite for neutral arena for DBA, not marked as significant and not discussed.H Due to the use of an unfamiliar cage (in the novel arena test) amounts of interactions occured relatively infrequent. Extremly low amounts of attacks were measured in the basicly low aggressive CBA in this situation. From the DBA experiments it was evident that attacks between geroup m…
68	68.4	Haemisch, A. and Gartner, K.	Journal of Experimental Animal Science	1994	The cage design affects intermale aggression in small groups of male laboratory mice: strain specific consequences on social organization, and endocrine activations in two inbred strains (DBA/2J and CBA/J)	In house for DBA/2J originally from Zentral-institut fur Versuchstierzucht, Hannover, FRG	DBA/2J	66	Approx 120 days of age when assign to experimental housing, housed in SC or EC for 1 week then for 6 weeks behavioural tests were performed one a week	Male	3	Siblings	Kept with the same cagemates as in the experiment for 12 weeks before experiment start, DBA/2J with siblings from weaning 3-5 per group and reduced to 3 per group for experiment. Enriched group allowed to adapt to novel condition for 1 week then studied for 6 weeks.	Open cage: 825cm2 for standard housing, 790cm2 for enriched housing	Not mentioned	Standard cage: soft-wood bedding (?) mentioned for housing before experiment but this is not really stated for the experimental phase, Enriched cage: Horizontal labyrinth at the cage bottom with a plane on top. Both accessible by holes in diagonal corners.	Group intruder test	Neutral arena - group separated for 2h then re-united in a neutral cage (no labyrinth)			Yes	Age	Within	No	Increased aggression with time in enriched cages	In the enriched cages group attack frequencies increased progressively with time that mice spent in the enriched environment. This was the case in the group intruder test for DBA. Significantly more attacks in week 5 and 6 in the enriched environment.	Here it looks like data is the opposite for neutral arena for DBA, not marked as significant and not discussed. Due to the use of an unfamiliar cage (in the novel arena test) amounts of interactions occured relatively infrequent. Extremly low amounts of attacks were measured in the basicly low aggressive CBA in this situation. From the DBA experiments it was evident that attacks between geroup me…
68	68.5	Haemisch, A. and Gartner, K.	Journal of Experimental Animal Science	1994	The cage design affects intermale aggression in small groups of male laboratory mice: strain specific consequences on social organization, and endocrine activations in two inbred strains (DBA/2J and CBA/J)	CBA/J obtained directly from Charles River, Sulzfeld, BRD	CBA/J	66	Approx 120 days of age when assign to experimental housing, housed in SC or EC for 1 week then for 6 weeks behavioural tests were performed one a week	Male	3	Non-sibling	CBA/J were delivered in groups of 20 at 21 days of age, at delivery grouped 3 by 3. Enriched group allowed to adapt to novel condition for 1 week then studied for 6 weeks.	Open cage: 825cm2 for standard housing, 790cm2 for enriched housing	Not mentioned	Standard cage: soft-wood bedding (?) mentioned for housing before experiment but this is not really stated for the experimental phase, Enriched cage: Horizontal labyrinth at the cage bottom with a plane on top. Both accessible by holes in diagonal corners.	Group intruder test	Neutral arena - group separated for 2h then re-united in a neutral cage (no labyrinth)			Yes	Enrichment	Between	N/a	No effect	No significant difference between standard or enriched cages. This result is a mean over 6 weeks, not considering the time aspect. When looking at data in the table (fig 2 c,d) we interpret it as if there is increased aggression during certain weeks.	Due to the use of an unfamiliar cage (in the novel arena test) amounts of interactions occured relatively infrequent. Extremly low amounts of attacks were measured in the basicly low aggressive CBA in this situation. From the DBA experiments it was evident that attacks between geroup members occured immediately when the mice were reintroduced into their home cage after the test was finished. Auth…
68	68.6	Haemisch, A. and Gartner, K.	Journal of Experimental Animal Science	1994	The cage design affects intermale aggression in small groups of male laboratory mice: strain specific consequences on social organization, and endocrine activations in two inbred strains (DBA/2J and CBA/J)	CBA/J obtained directly from Charles River, Sulzfeld, BRD	CBA/J	66	Approx 120 days of age when assign to experimental housing, housed in SC or EC for 1 week then for 6 weeks behavioural tests were performed one a week	Male	3	Non-sibling	CBA/J were delivered in groups of 20 at 21 days of age, at delivery grouped 3 by 3. Enriched group allowed to adapt to novel condition for 1 week then studied for 6 weeks.	Open cage: 825cm2 for standard housing, 790cm2 for enriched housing	Not mentioned	Standard cage: soft-wood bedding (?) mentioned for housing before experiment but this is not really stated for the experimental phase, Enriched cage: Horizontal labyrinth at the cage bottom with a plane on top. Both accessible by holes in diagonal corners.	Group intruder test	Neutral arena - group separated for 2h then re-united in a neutral cage (no labyrinth)			Yes	Age	Within	No	no effect of time in standard cages	In the enriched cages group attack frequencies increased progressively with time that mice spent in the enriched environment. Attack frequencies in standard cages remanied constant over time. This was the case in both intruder test and group test for CBA/J. Significantly more attacks in week 5 and 6 in the enriched environment.	Time effect in neutral arenar (fig 2d) but not as cleas in group intruderi g test (fig 2c).. Due to the use of an unfamiliar cage (in the novel arena test) amounts of interactions occured relatively infrequent. Extremly low amounts of attacks were measured in the basicly low aggressive CBA in this situation. From the DBA experiments it was evident that attacks between geroup members occured immed…
68	68.7	Haemisch, A. and Gartner, K.	Journal of Experimental Animal Science	1994	The cage design affects intermale aggression in small groups of male laboratory mice: strain specific consequences on social organization, and endocrine activations in two inbred strains (DBA/2J and CBA/J)	CBA/J obtained directly from Charles River, Sulzfeld, BRD	CBA/J	66	Approx 120 days of age when assign to experimental housing, housed in SC or EC for 1 week then for 6 weeks behavioural tests were performed one a week	Male	3	Non-sibling	CBA/J were delivered in groups of 20 at 21 days of age, at delivery grouped 3 by 3. Enriched group allowed to adapt to novel condition for 1 week then studied for 6 weeks.	Open cage: 825cm2 for standard housing, 790cm2 for enriched housing	Not mentioned	Standard cage: soft-wood bedding (?) mentioned for housing before experiment but this is not really stated for the experimental phase, Enriched cage: Horizontal labyrinth at the cage bottom with a plane on top. Both accessible by holes in diagonal corners.	Group intruder test	Neutral arena - group separated for 2h then re-united in a neutral cage (no labyrinth)			Yes	Age	Within	No	Increased aggression with time in enriched cages,	In the enriched cages group attack frequencies increased progressively with time that mice spent in the enriched environment. Attack frequencies in standard cages remanied constant over time. This was the case in both intruder test and group test for CBA/J. Significantly more attacks in week 5 and 6 in the enriched environment.	Time effect in neutral arenar (fig 2d) but not as cleas in group intruderi g test (fig 2c).. Due to the use of an unfamiliar cage (in the novel arena test) amounts of interactions occured relatively infrequent. Extremly low amounts of attacks were measured in the basicly low aggressive CBA in this situation. From the DBA experiments it was evident that attacks between geroup members occured immed…
69	69.1	Kaliste-Korhonen, E., and S. Eskola.	Laboratory Animals	2000	Fighting in NIH/S male mice: consequences for behaviour in resident-intruder tests and physiological parameters	National Public Health Institute, Kuopio, Finland	NIH/S	72	Kept with siblings from weaning (? See housing condition before grouping) test groups formed formed by random allocation into groups at 10 weeks, kept untill 13 weeks	Male	4	Non-sibling	Animals were housed from weaning in sibling groups consisting of four to seven males. The siblings of two or three males were combined to create groups of four to five males. At the age of 8-9 weeks, the first RI test was performed: the animals to be tested were weighed and transferred to individual cages. At the age of 10 weeks, the animals were randomly allocated to test groups of four strange …	Open cage (42 x 25 x 15cm)	Not mentioned	Aspen chip	Wound count once a week	Group intruder test			Yes	Changing groups - into group of 4 strangers at 10 weeks	Within	No	Increased outcome in new groups	After the new social groups had been formed, fighting occurred initially in 13 groups of the total 18. After 2 days, 48% of the animals were wounded in new social groups, and this proportion stayed at the same level until the end of study. Authors state that: Animals were housed from weaning in sibling groups consisting of four to seven males. The siblings of two or three males were combined to c…	The occurrence of fighting in a new social group, as indicated by the numbers of wounded group members, was found in 70% of the new groups formed. Moreover, the fighting in groups did not reduce over time. This indicates great aggressiveness in this strain. In summary, the probability of fighting in NIH/S male groups increased with increasing numbers of initially aggressive cage mates. The behavi…
70	70.1	McQuaid, R. J., M. C. Audet, and H. Anisman.	Stress: The International Journal on the Biology of Stress	2012	Environmental enrichment in male CD-1 mice promotes aggressive behaviors and elevated corticosterone and brain norepinephrine activity in response to a mild stressor	Charles River Canada	CD-1	62	6-8 weeks at arrival, home cage behaviour scored the following 4 days	Male	3-4	Not mentioned	Arrived at 6-8 weeks directly into experimental housing	Open cage: SE 27x21x14cm or EE 50x40x20cm	Once weekly	SE: one cotton nestlet or EE: EE: 2 running wheels + one red polypropylene shelter + one orange polypropylene shelter with an angled running wheel + three yellow polypropylene tunnels + two cotton nestlets	Home cage behaviour				Yes	Enrichment	Between	N/a	Increased aggression in EE as compared to SE	After just 5 days 11 of the 31 EE mice and 4 of the 31 SE mice had been removed for ethical reasons beeing highly aggressive. This difference is statistically significant. Aggressive chases significantly more common in EE, also significantly more wounding in EE. Differences in aginistic encounters or attacks are not significant but higher numbers in EE.	Bigger cage for EE but same amount of mice.
71	71.1	Haemisch, A., T. Voss, and K. Gartner.	Physiology & Behavior	1994	Effects of environmental enrichment on aggressive behavior, dominance hierarchies, and endocrine states in male DBA/2J mice	In house originaly from Zentralinstitut fur Versuchstierzucht Hannover Germany	DBA/2J	66	Experimental housing started at 120 days of age mice were then allowed to adapt to experimental housing for 2 weeks and then the experiments were performed for 6 weeks	Male	3	Sibling	From weaning till onset of experiment (when 120 days of age) the mice were in groups of 3-5 sblings, then into experimental groups of 3 siblings	Open cage: enriched 26.5x42x18.5cm not mentioned if the standard cage is the same size	Not mentioned	Enriched: PVC platform standing on vertical dividers creating several corners and burrow like structures under the platform. The top floor was accessible through 2 holes in oposite corners of the cage,	Group intruder test	Group test - mice separated for 2h then put together in neutral cage			Yes	Enrichment	Between	N/a	Increased aggression in enriched cages	Significant differences between ousing condiditons were revealed in the intruder test but not the group test. Mice in EC attached more frequently than mice in SC.	Attack frequencies between group members did not differ between the two housing conditions. This was obviously an outcome of the test procedure. The group test was carried out in a neutral cage to avoid bias in the observation conditions between the completely visible standard cage and the only partly visible enriched cage. In the neutral cage, mice were primarily engaged in investigating the cag…
71	71.2	Haemisch, A., T. Voss, and K. Gartner.	Physiology & Behavior	1994	Effects of environmental enrichment on aggressive behavior, dominance hierarchies, and endocrine states in male DBA/2J mice	In house originaly from Zentralinstitut fur Versuchstierzucht Hannover Germany	DBA/2J	66	Experimental housing started at 120 days of age mice were then allowed to adapt to experimental housing for 2 weeks and then the experiments were performed for 6 weeks	Male	3	Sibling	From weaning till onset of experiment (when 120 days of age) the mice were in groups of 3-5 sblings, then into experimental groups of 3 siblings	Open cage: enriched 26.5x42x18.5cm not mentioned if the standard cage is the same size	Not mentioned	Sandard: Enriched: PVC platform standing on vertical dividers creating several corners and burrow like structures under the platform. The top floor was accessible through 2 holes in oposite corners of the cage.	Group intruder test	Group test - mice separated for 2h then put together in neutral cage			Yes	Time	Between	N/a	No effect in standard cages	Comparisions of the weekly data with Mann-Whitney U-test revealed significant differences in weeks 5 and 6. Thus after 4 wk of housing in an EC aggressive behaviour increased while in the SC it remained at a constant level.
71	71.3	Haemisch, A., T. Voss, and K. Gartner.	Physiology & Behavior	1994	Effects of environmental enrichment on aggressive behavior, dominance hierarchies, and endocrine states in male DBA/2J mice	In house originaly from Zentralinstitut fur Versuchstierzucht Hannover Germany	DBA/2J	66	Experimental housing started at 120 days of age mice were then allowed to adapt to experimental housing for 2 weeks and then the experiments were performed for 6 weeks	Male	3	Sibling	From weaning till onset of experiment (when 120 days of age) the mice were in groups of 3-5 sblings, then into experimental groups of 3 siblings	Open cage: enriched 26.5x42x18.5cm not mentioned if the standard cage is the same size	Not mentioned	Enriched: PVC platform standing on vertical dividers creating several corners and burrow like structures under the platform. The top floor was accessible through 2 holes in oposite corners of the cage.	Group intruder test	Group test - mice separated for 2h then put together in neutral cage			Yes	Time	Between	N/a	Increased aggression after 5-6 weeks of enriched housing	Comparisions of the weekly data with Mann-Whitney U-test revealed significant differences in weeks 5 and 6. Thus after 4 wk of housing in an EC aggressive behaviour increased while in the SC it remained at a constant level.
72	72.1	D’Andrea, Ivana, Enrico Alleva, and Igor Branchi.	Behavioural Brain Research	2007	Communal nesting, an early social enrichment, affects social competences but not learning and memory abilities at adulthood	In house originally from Harlan, 20050 Correzzana, MI, Italy	CD-1 Swiss-derived strain (ICR)	10	Weaned at 25 days of age, 10 months when studied	Male	2	Litters culled to 6 males and 2 females on PND 1, these 6 were then kept together	The litters were culled on PND 1 (birth=PND 0) to six males and two females. Pups were weaned on PND 25 and males of each litter were housed in groups of 6. Behavioural studies were performed when mice were 10 minths old. For home cage behaviour observations animals were placed 2 per cage 1 month before the test.	Open cage: 33x13x14cm	Not mentioned	Not mentioned	Home cage behaviour	Home cage behaviour after changing to clean sawdust			Yes	Nesting condition standard or comunal	Between	N/a	Increased aggression in communaly nested mice compared to standard nesting when scoring home cage behaviour after changing to clean sawdust	Accordingly, on the first day of observation, no or very limited offensive behaviors were scored. However, as expected [26,54], on the second day of observation, the clean sawdust increased the agonistic interactions. Such increasewasmorepronounced inCNmicethat displayed a wider repertoire of agonistic/aggressive responses and higher levels of offensive behaviors, compared to SN mice. Indeed, spe…	Being reared in CN, a condition which characterizes the natural ecological niche of the developing mouse [18,19,36] and represents a form of early social enrichment [7,49], exerts long-term effects on the adult social and emotional behavior [6,7].
73	73.1	Tan, Shawn, Yixin Xiao, Henry H. Yin, Albert I. Chen, Tuck Wah Soong, and H. Shawn Je.	Proceedings of the National Academy of Sciences of the United States of America	2018	Postnatal TrkB ablation in corticolimbic interneurons induces social dominance in male mice	In house	TrkB cKO (KO of TrkB in Corticolimbic GABAergic Neurons)	56 for social dominance test	8-20 weeks at observations	Male	2 for social dominance test otherwise not mentioned	Not mentioned	Not mentioned	Not mentioned	Not mentioned	Not mentioned	Descriptive observation	Social dominance test - flyttar parhållna till ny bur och observerar			Yes	Strain KO	Between	N/a	Increased aggression in TrkB cKO (KO of TrkB in Corticolimbic GABAergic Neurons) as compared to Ctrl	Intriguingly, despite largely normal behavior of TrkB cKO mice, we observed more frequent fighting in cages housed only with TrkB cKO males. As an alternative test for social dominance, we performed an agonistic behavior assay (17). When group-housed mice are placed in a new environment, the dominant male often exhibits agonistic aggression toward cage mates, presumably to claim a new territory (…	Unclear article, mostly talking abouut single housing But the line states: "we observed more frequent fighting in cages housed only with TrkB cKO males".
74	74.1	Blankenberger, W. B., E. M. Weber, D. K. Chu, J. T. Geronimo, J. Theil, B. N. Gaskill, K. Pritchett-Corning, M. A. Albertelli, J. P. Garner, and J. Ahloy-Dallaire.	Applied Animal Behaviour Science	2018	Breaking up is hard to do: Does splitting cages of mice reduce aggression?	Not known	"fighting mice" - varying strains	100	Varying	Male	2-5	Not kown	Mice collected from different studies where they have been identified as "fighting" mice.	IVC (29.5W x 17.7 L x 12.7 H)	Not mentioned	Enriched but varying depending on previous setting	Home cage behaviour	Wound scoring			Yes	Group size -starting with 4 or 5 then separating to 2 or 3	Within	No	Decreased wounding when separated into smaller groups	There was a significant interaction between treatment and number of days since separation in absolute improvement (Fig. 2:F1,79.8=8.12, p=0.006), indicating that wound scores in mixed and wounded treatment cages changed differently over time. In Bonferroni-corrected planned contrasts, slopes of absolute improvement per day were significantly different from zero in both wounded (F1,80.2=38.76, p <…	Wound scores decreased significantly over time in both post-separation cage treatments. Though mice in the wounded treatment healed more rapidly than mice in the mixed treatment, even those mice living with a presumed aggressor did get noticeably better. We did not include a no-intervention control group due to animal welfare concerns, so we do not know how these mice would have fared if not sepa…
74	74.2	Blankenberger, W. B., E. M. Weber, D. K. Chu, J. T. Geronimo, J. Theil, B. N. Gaskill, K. Pritchett-Corning, M. A. Albertelli, J. P. Garner, and J. Ahloy-Dallaire.	Applied Animal Behaviour Science	2018	Breaking up is hard to do: Does splitting cages of mice reduce aggression?	Not known	"fighting mice" - varying strains	100	Varying	Male	2-5	Not kown	Mice collected from different studies where they have been identified as "fighting" mice.	IVC (29.5W x 17.7 L x 12.7 H)	Not mentioned	Enriched but varying depending on previous setting	Home cage behaviour	Wound scoring			Yes	Separation - only wounded or mixed groups	Between	No	Decreased wounding in only wounded groups as compared to groups with both wounded and not wounded mice	There was a significant interaction between treatment and number of days since separation in absolute improvement (Fig. 2:F1,79.8=8.12, p=0.006), indicating that wound scores in mixed and wounded treatment cages changed differently over time. In Bonferroni-corrected planned contrasts, slopes of absolute improvement per day were significantly different from zero in both wounded (F1,80.2=38.76, p <…	Wound scores decreased significantly over time in both post-separation cage treatments. Though mice in the wounded treatment healed more rapidly than mice in the mixed treatment, even those mice living with a presumed aggressor did get noticeably better. We did not include a no-intervention control group due to animal welfare concerns, so we do not know how these mice would have fared if not sepa…
75	75.1	Abramov, Urho, Triinu Puussaar, Sirli Raud, Kaido Kurrikoff, and Eero Vasar.	Neuroscience Letters	2008	Behavioural differences between C57BL/6 and 129S6/SvEv strains are reinforced by environmental enrichment	In house	C57Bl/6	30	After weaning at 3 weeks, mice were randomly allocated to either standard or enriched conditions for 7weeks before the start of experiments.	Male	7–8	Non-sibling	After weaning at 3 weeks mice were allocated into experimental housing for 7 weeks before start of experiments, RI test performed on day 14	Standard laboratory cages (425mm×266mm×155mm), mice in the environmentally enriched conditions were housed in larger cages (595mm×380mm×200mm)	Not mentioned but enrichment changed and repositioned once a week	Standard housing: bedding or enriched conditions: bedding, nesting material, stainless steel wheels or swings and aspen houses, igloos, ladders, tubes or labyrinths, whichwere changed and repositioned once a week	Resident intruder test				Yes	Enrichment	Between	No	No effect of enrichment in B6 strain	Fig 2F, statistik finns	States in the bigining of text that data for male and female have been pooled, BUT in text about RI-test it states that only male have been used.S The routine use of environmental enrichment in addition to standard housing conditions has several caveats, however. Certainly, this approachis incontradiction with the reduction principle of the 3R’s (replacement, refinement, reduction). Furthermore, …
75	75.2	Abramov, Urho, Triinu Puussaar, Sirli Raud, Kaido Kurrikoff, and Eero Vasar.	Neuroscience Letters	2008	Behavioural differences between C57BL/6 and 129S6/SvEv strains are reinforced by environmental enrichment	In house	129S6/SvEv/Tac	32	After weaning at 3 weeks, mice were randomly allocated to either standard or enriched conditions for 7weeks before the start of experiments.	Male	7–8	Non-sibling	After weaning at 3 weeks mice were allocated into experimental housing for 7 weeks before start of experiments, RI test performed on day 14	Standard laboratory cages (425mm×266mm×155mm), mice in the environmentally enriched conditions were housed in larger cages (595mm×380mm×200mm)	Not mentioned but enrichment changed and repositioned once a week	Standard housing: bedding or enriched conditions: bedding, nesting material, stainless steel wheels or swings and aspen houses, igloos, ladders, tubes or labyrinths, whichwere changed and repositioned once a week	Resident intruder test				Yes	Enrichement	Between	No	Decreased aggression in enriched environment in 129 strain	Fig 2F, statistik finns	States in the bigining of text that data for male and female have been pooled, BUT in text about RI-test it states that only male have been used.. The routine use of environmental enrichment in addition to standard housing conditions has several caveats, however. Certainly, this approachis incontradiction with the reduction principle of the 3R’s (replacement, refinement, reduction). Furthermore, …
75	75.3	Abramov, Urho, Triinu Puussaar, Sirli Raud, Kaido Kurrikoff, and Eero Vasar.	Neuroscience Letters	2008	Behavioural differences between C57BL/6 and 129S6/SvEv strains are reinforced by environmental enrichment	In house	C57Bl/6 and 129S6/SvEv/Tac	62	After weaning at 3 weeks, mice were randomly allocated to either standard or enriched conditions for 7weeks before the start of experiments.	Male	7–8	Non-sibling	After weaning at 3 weeks mice were allocated into experimental housing for 7 weeks before start of experiments, RI test performed on day 14	Standard laboratory cages (425mm×266mm×155mm), mice in the environmentally enriched conditions were housed in larger cages (595mm×380mm×200mm)	Not mentioned but enrichment changed and repositioned once a week	Standard housing: bedding or enriched conditions: bedding, nesting material, stainless steel wheels or swings and aspen houses, igloos, ladders, tubes or labyrinths, whichwere changed and repositioned once a week	Resident intruder test				Yes	Strain	Between	No	Increased aggression in 129 strain as compared to B6 only in standard condition not in enriched	129 strain, housed in standard conditions, performed significantly more attacks on intruders than B6 strain housed in standard conditions (p<0.05), but this strain-related differencewas not observed in mice housed in enriched conditions (Fig. 2F).	States in the bigining of text that data for male and female have been pooled, BUT in text about RI-test it states that only male have been used.. The routine use of environmental enrichment in addition to standard housing conditions has several caveats, however. Certainly, this approachis incontradiction with the reduction principle of the 3R’s (replacement, refinement, reduction). Furthermore, …
75	75.4	Abramov, Urho, Triinu Puussaar, Sirli Raud, Kaido Kurrikoff, and Eero Vasar.	Neuroscience Letters	2008	Behavioural differences between C57BL/6 and 129S6/SvEv strains are reinforced by environmental enrichment	In house	C57Bl/6 and 129S6/SvEv/Tac	62	After weaning at 3 weeks, mice were randomly allocated to either standard or enriched conditions for 7weeks before the start of experiments.	Male	7–8	Non-sibling	After weaning at 3 weeks mice were allocated into experimental housing for 7 weeks before start of experiments, RI test performed on day 14	Standard laboratory cages (425mm×266mm×155mm), mice in the environmentally enriched conditions were housed in larger cages (595mm×380mm×200mm)	Not mentioned but enrichment changed and repositioned once a week	Standard housing: bedding or enriched conditions: bedding, nesting material, stainless steel wheels or swings and aspen houses, igloos, ladders, tubes or labyrinths, whichwere changed and repositioned once a week	Resident intruder test				Yes	Strain	Between	No	No difference in enriched cages	129 strain, housed in standard conditions, performed significantly more attacks on intruders than B6 strain housed in standard conditions (p<0.05), but this strain-related differencewas not observed in mice housed in enriched conditions (Fig. 2F).	States in the bigining of text that data for male and female have been pooled, BUT in text about RI-test it states that only male have been used.. The routine use of environmental enrichment in addition to standard housing conditions has several caveats, however. Certainly, this approachis incontradiction with the reduction principle of the 3R’s (replacement, refinement, reduction). Furthermore, …
76	76.1	Nakamura, Y., A. Ueno, Y. Nunomura, K. Nakagaki, S. Takeda, and K. Suzuki.	Experimental Animals	2016	Effects of Inducing Exercise on Growing Mice by Means of Three-Dimensional Structure in Rearing Environment	CLEA Japan (Tokyo, Japan)	Jcl: ICR	40	20 day old mice obtained, allocated to experimental housing and experiments initiated. Sacrificed at 10 weeks.	Male	4	Non-sibling	Into experimental housing at arrival	Open cage: W282 × H157 × D451 mm	Not mentioned but: The wooden obstacles were changed every week to maintain cleanliness.	Standard: woodchip bedding ot Enriched: three (ladder, cube, partition) aspen wooden obstacles	Descriptive observation				Yes	Enrichement	Between	No	Decreased aggression in enriched cages	In this study, we observed that only control mice showed stereotypical and highly aggressive behaviors.
77	77.1	Kempf, E., S. Puglisi-Allegra, S. Cabib, C. Schleef, and P. Mandel.	Progress in Neuro-Psychopharmacology and Biological Psychiatry	1984	Serotonin levels and turnover in different brain areas of isolated aggressive or non-aggressive strains of mice	Charles River, France	C57Bl/6 and DBA/2	72 per strain in total (not specified how many were group housed)	11-12 weeks at start of experiment, continues for 8 weeks	Male	6	Not mentioned	Not mentioned	Open cage (27x21x13,5cm)	Not mentioned	Not mentioned	Not described - but a 10 minute fighting session between 2 mice (a method previously described (Puglisi-Allegra and Renzi, 1980)). Det står "fighting between two grouped or isolated mice" så de grupphållna får slåss med andra grupphållna.				Yes	Strain	Between	N/a	No difference	Fig 1. Shows no difference between grouphoused mice of the 2 strains. This is not mentioned in the text and no statistics are made between groups.
78	78.1	Ambrose, Neil and Morton, David B.	Journal of Applied Animal Welfare Science	2000	The Use of Cage Enrichment to Reduce Male Mouse Aggression	In house	BALB/c	66	7 weeks at arrival, allowed to acclimate for 2 weeks before experiment, the experiment went on for 5 weeks	Male	6	Not mentioned	7 weeks at arrival, allowed to acclimate for 2 weeks before experiment	Open cage: M3 45 × 12 × 12 cm	Twice a week	Sawdust substrate, tissue paper bedding, wooden block, tube, box	Home cage behaviour after cage cleaning	Looking at the mice in their homecage daily			Yes	Enrichment	Within	No	Decreased aggression when adding enrichment	Aggression was significantly reduced by the addition of novel enrichment. When identical, but clean, objects were used in Week 4 (new, but not novel enrichment), the level of aggression was again significantly reduced. The levels of aggression in three of the nonenriched groups reached such levels (severe tail injuries, foot damage, and deep flank wounds) that the cages had to be removed from the…
78	78.2	Ambrose, Neil and Morton, David B.	Journal of Applied Animal Welfare Science	2000	The Use of Cage Enrichment to Reduce Male Mouse Aggression	In house	BALB/c	66	7 weeks at arrival, allowed to acclimate for 2 weeks before experiment, the experiment went on for 5 weeks	Male	6	Not mentioned	7 weeks at arrival, allowed to acclimate for 2 weeks before experiment	Open cage: M3 45 × 12 × 12 cm	Twice a week	Sawdust substrate, tissue paper bedding, wooden block, tube, box	Home cage behaviour after cage cleaning				Yes	Cleaning procedure	Within	No	Increased aggression when moving soiled enrichment items at cage cleaning
78	78.3	Ambrose, Neil and Morton, David B.	Journal of Applied Animal Welfare Science	2000	The Use of Cage Enrichment to Reduce Male Mouse Aggression	In house	BALB/c	60	8 weeks at arrival, allowed to acclimate for 2 weeks before experiment, the experiment went on for 8 weeks	Male	5	Not mentioned	7 weeks at arrival, allowed to acclimate for 2 weeks before experiment	Open cage: M3 45 × 12 × 12 cm	Twice a week	Glass water bottle as enrichement	Home cage behaviour after cage cleaning				Yes	Enrichment	Between	N/a	Decreased aggression in enriched cages	The glass bottle kept mean aggression levels below the Week 0 (no enrichment) levels for 5 weeks and significantly lower than the control group for the entire study.
78	78.4	Ambrose, Neil and Morton, David B.	Journal of Applied Animal Welfare Science	2000	The Use of Cage Enrichment to Reduce Male Mouse Aggression	In house	BALB/c	60	8 weeks at arrival, allowed to acclimate for 2 weeks before experiment, the experiment went on for 8 weeks	Male	5	Not mentioned	7 weeks at arrival, allowed to acclimate for 2 weeks before experiment	Open cage: M3 45 × 12 × 12 cm	Twice a week	Glass water bottle as enrichement in the enriched groups	Home cage behaviour after cage cleaning				Yes	Time	Within	No	Increased aggression with time in standard cage	Aggression is increasing over time in both enriched and non-enriched cages. Authors are mainly comparing enriched and non-enriched so there is no statistics done on the mesurements over time.
78	78.5	Ambrose, Neil and Morton, David B.	Journal of Applied Animal Welfare Science	2000	The Use of Cage Enrichment to Reduce Male Mouse Aggression	In house	BALB/c	60	8 weeks at arrival, allowed to acclimate for 2 weeks before experiment, the experiment went on for 8 weeks	Male	5	Not mentioned	7 weeks at arrival, allowed to acclimate for 2 weeks before experiment	Open cage: M3 45 × 12 × 12 cm	Twice a week	Glass water bottle as enrichement in the enriched groups	Home cage behaviour after cage cleaning				Yes	Time	Within	No	Increased aggression with time in enriched cage	Aggression is increasing over time in both enriched and non-enriched cages. Authors are mainly comparing enriched and non-enriched so there is no statistics done on the mesurements over time.
79	79.1	Armstrong, K. R. Clark, T. R. and Peterson, M. R.	Contemporary Topics in Laboratory Animal Science	1998	Use of Corn-Husk Nesting Material to Reduce Aggression in Caged Mice	Harlan Sprague Dawley, Indianapolis	BALB/cAnNHsd	128	6-7 weeks old when assign to treatment, experiment went on for 1 week	Male	8	Non sibling (randomly assigned)	We attempted to maintain integrity of original groups as much as possible, and allowed mice to acclimate for 1 week before initiating the study.	Microisolators 46 x 24 x 15 cm	Weekly	Corn-husk nesting material in enriched cages, standard bedding	Wound check on day 0 (manual restraint), 4 (anesthetized) and 7 (manual restraint)				Yes	Enrichment	Between	N/a	Decresead aggression in enriched cages measured by wounds on day 4 of treatment	Comparison of mean number of wounds detected on day 4 revealed that mice on the corn-husk nesting material had significantly (P = 0.01) fewer wounds per mouse than those on standard bedding alone. On day 7, mice on the corn-husk nesting material had a mean number of wounds that was not significantly different from those on the standard bedding.	Visual observation proved to be a poor indicator of aggression in our study, because few confrontations were recorded during the observation sessions. Examination of the mice for evidence of wounds proved to be the most effective method for comparing the groups, and, therefore, visual observation data were not used for comparison.
80	80.1	Kareem, A. M. and Barnard, C. J.	Animal Behaviour	1982	The importance of kinship and familiarity in social interactions between mice	In house	CFLP	20?	Tested in neutral arena at 30-32 days and 68-73 days	Male	4	Both	Litters reduced at weaning (22 days) to 8 pups (4 per sex) on day 33 separated to unisexual groups of 4	Not mentioned	Not mentioned	Not mentioned	Neutral arena - put in cage with partition, settle for 5 minutes, partition removed				Yes	Time	Within	No	No difference (significant) in aggression comparing juvenile and adult age	Table 1 only using data from familiar full siblings - meaning that they are from the same cage	Tested at juvenile (30-32 days) and adult (68-73 days) age
80	80.2	Kareem, A. M. and Barnard, C. J.	Animal Behaviour	1982	The importance of kinship and familiarity in social interactions between mice	In house	CFLP	80?	Tested in neutral arena at 66-73 days	Male	Max 8	Treatment	Shortly before birth, the litters were arranged to produce different degrees of relatedness and familiarity among individuals. Eight litters of half sibs (again sharing only paternity) were born with two litters per cage. Eight litters of non-sibs were arranged similarly, and eight litters each of half sibs and non-sibs were born and reared as single litters in separate cages. All individuals bor…	Not mentioned	Not mentioned	Not mentioned	Neutral arena - put in cage with partition, settle for 5 minutes, partition removed				Yes	Sibling/non-sibling	Between	N/a	No difference in aggression comparing siblings and non-siblings	Table 2 and 3 only using data from familiar siblings vs. half-siblings and half-siblings vs. non-siblings	Differences between non-sib and both half-sib and full-sib pairs disappeared when companions had had prior experience of one another.
81	81.1	McGregor, Peter K. and Ayling, Samantha J.	Applied Animal Behaviour Science	1990	Varied cages result in more aggression in male CFLP mice	In house	CFLP	40	Around 60 days of age when tested	Male	10	Not mentioned	Not mentioned	Open cage: 44 X 26 X 12 cm for housing in the test situation also larger wooden cages	Not mentioned	Sawdust with and without broken bricks and flowerpots in the test cages, not mentioned for the housing cages	Two mice put in a smaller or larger test cage with or without enrichment - observed for max 30 min				Yes	Enrichment	Between	N/a	Increased aggression i enriched test cages	Males in more "varied" cages showed aggression more quickly (regardless of cage size ) than those in less varied cages. A 2-way analysis of variance hows that there is a significant effect of the type of test cage	NOTE the enrichment is only in the test-cage not in the holding cages
81	81.2	McGregor, Peter K. and Ayling, Samantha J.	Applied Animal Behaviour Science	1990	Varied cages result in more aggression in male CFLP mice	In house	CFLP	40	Around 60 days of age when tested	Male	10	Not mentioned	Not mentioned	Open cage: 44 X 26 X 12 cm for housing in the test situation also larger wooden cages	Not mentioned	Sawdust with and without broken bricks and flowerpots in the test cages, not mentioned for the housing cages	Two mice put in a smaller or larger test cage with or without enrichment - observed for max 30 min				Yes	Cage size	Between	N/a	No difference in aggression based on size of the test cages	Males in more "varied" cages showed aggression more quickly (regardless of cage size) than those in less varied cages. A 2-way analysis of variance hows that there is a significant effect of the type of test cage	NOTE it is only the test cages that are of different size not in the holding cages
82	82.1	Bisazza, Angelo	Bollettino di Zoologia	1981	Social organization and territorial behaviour in three strains of mice	In house	Swiss, BALB/c,	40	Transfered to experimental apparatus at 35-37 days, kept there for 30 days, indivudual aggression tests peformed on the 31st day	Male	2	Sibling	Caged in homogenous groups of 3 since weaning	The enclosures consisted of two equal wooden boxes (60x 120x50 cm) with a glass front wall were connected by a runway of 9 metres which consisted partly of tubes of transparent plastic material and partly of wire mesh. The runway was complicated by two almost vertical descents (i.e. obstacles but easily negotiable, although mice would normally be reluctant to try without an adequate stimulus) pla…	Sawdust left unchanged for the duration of the experiment	Sawdust, shredded paper, dried grass	Home cage behaviour	Standard oponent introduced			Yes	Strain	Between	N/a	Increased aggression in Swiss as compared to BALB/c	In brief, Swiss males were the most aggressive (U test p<0.001), and BALB mice significantly more than black mice (U test p<0.001).	The Swiss mice established separate territories while the other strains chose to live together
82	82.2	Bisazza, Angelo	Bollettino di Zoologia	1981	Social organization and territorial behaviour in three strains of mice	In house	SWISS, C57BL/6	24	Transfered to experimental apparatus at 35-37 days, kept there for 30 days, indivudual aggression tests peformed on the 31st day	Male	2	Sibling	Caged in homogenous groups of 3 since weaning	The enclosures consisted of two equal wooden boxes (60x 120x50 cm) with a glass front wall were connected by a runway of 9 metres which consisted partly of tubes of transparent plastic material and partly of wire mesh. The runway was complicated by two almost vertical descents (i.e. obstacles but easily negotiable, although mice would normally be reluctant to try without an adequate stimulus) pla…	Sawdust left unchanged for the duration of the experiment	Sawdust, shredded paper, dried grass	Home cage behaviour	Standard oponent introduced			Yes	Strain	Between	N/a	Increased aggression in SWISS as compared to C57Bl/6	In brief, Swiss males were the most aggressive (U test p<0.001), and BALB mice significantly more than black mice (U test p<0.001).
82	82.3	Bisazza, Angelo	Bollettino di Zoologia	1981	Social organization and territorial behaviour in three strains of mice	In house	BALB/c, C57BL/6	24	Transfered to experimental apparatus at 35-37 days, kept there for 30 days, indivudual aggression tests peformed on the 31st day	Male	2	Sibling	Caged in homogenous groups of 3 since weaning	The enclosures consisted of two equal wooden boxes (60x 120x50 cm) with a glass front wall were connected by a runway of 9 metres which consisted partly of tubes of transparent plastic material and partly of wire mesh. The runway was complicated by two almost vertical descents (i.e. obstacles but easily negotiable, although mice would normally be reluctant to try without an adequate stimulus) pla…	Sawdust left unchanged for the duration of the experiment	Sawdust, shredded paper, dried grass	Home cage behaviour	Standard oponent introduced			Yes	Strain	Between	N/a	Increased aggression in BALB/c as compared to C57Bl/6	In brief, Swiss males were the most aggressive (U test p<0.001), and BALB mice significantly more than black mice (U test p<0.001).
83	83.1	Bishop, M.J. and Chevins, P.F.D	Behavioural Processes	1987	Urine odours and marking patterns in territorial laboratory mice (Mus musculus )	In house	TO	20	10 weeks at start of experiment (left undisturbed for 10 days before observations started)	Male	20 (5 x 4) in free range room	Non-sibling	Mice were assigned randomly at three weeks of age to twelve non-sibling groups of five, where they remained undisturbed except for routine care until 10 weeks old then rehoused for experiment.	Free range room (2,4 x 2,8 m) divided in 4 quarters	Not mentioned	Each quarter in the free-range room contained a water bottle, a wire mesh hopper with food, a wooden nestbox with perspex lid (17 x 17 x 11 cms) and a number of house-bricks	Home cage behaviour daily observations				Yes	Time	Within	No	Decreased aggression with time	Intense fighting, in particular between the groups, was observed at first but gradually reduced over the following four or five days. After about five days, very little fighting was observed, and the general level of activity was markedly reduced with animals remaining predominantly in their home quarters.	Mice were assigned randomly at three weeks of age to twelve non-sibling groups of five, where they remained undisturbed except for routine care until 10 weeks old then rehoused for experiment. 4 groups of 5 was then placed at the floor of a large room divided i 4 quarters. When dominance status had been established the partitions were removed so that all 20 mice had acces to the whole room. Fight…
84	84.1	Poole, T.B and Morgan, H. D. R.	Animal Behaviour	1976	Social and territorial behaviour of laboratory mice (Mus musculus L.) in small complex areas	Not mentioned	LACA/CFW	45	14-28 weeks, observed for 10 days	Male	5	Non-sibling	Kept individually and then placed in groups of 5 in 0.6 x 0.3 x 0.3 m for 21 days observation period and then in different sized areas	Open space area 2,6 or 3,9 or 5,2 m2	Not mentioned	The areas into which the mice were released were made complex by the addition of numerous objects and by overhead runs (see Plate VII, Fig. 1). Food was scattered liberally, and five water bottles were distributed through_x0002_out the area; a sawdust substrate was provided.	"Homecage behaviour" daily observations				Yes	Different sized areas - "cage size"	Between	N/a	Decreased fighting with increased area	Most of the aggressive behaviour recorded took the form of unilateral attacks to which the opponent did not retaliate. Significantly fewer attacks were recorded from the 5.2 m 2 area as compared with the two smaller areas.	In discussion: in confined areas of fixed size the amount of aggression between male mice is inversely related to the size of area available to the group
84	84.2	Poole, T.B and Morgan, H. D. R.	Animal Behaviour	1976	Social and territorial behaviour of laboratory mice (Mus musculus L.) in small complex areas	Not mentioned	LACA/CFW	45	14-28 weeks, observed for 10 days	Male	5	Non-sibling	Kept individually and then placed in groups of 5 in 0.6 • 0.3 • 0.3 m for 21 days observation period and then in different sized areas	Open space area 2,6 or 3,9 or 5,2 m2	Not mentioned	The areas into which the mice were released were made complex by the addition of numerous objects and by overhead runs (see Plate VII, Fig. 1). Food was scattered liberally, and five water bottles were distributed through_x0002_out the area; a sawdust substrate was provided.	"Homecage behaviour" daily observations				Yes	Time	Within	No	Decreased fighting with time	The frequency of fighting appeared to be similar in different sized areas. In every colony the number of fights declined over the 10-day period, 86 per cent being recorded during the first 5 days of the experiments
84	84.3	Poole, T.B and Morgan, H. D. R.	Animal Behaviour	1976	Social and territorial behaviour of laboratory mice (Mus musculus L.) in small complex areas	Not mentioned	LACA/CFW	20	14-28 weeks	Male	5	Non-sibling	Kept individually and then placed in groups of 5 in 0.6 • 0.3 • 0.3 m for 21 days observation period and then in different sized areas	Open space area 1,3 then 2,6 or 3,9 or 5,2 m2	Not mentioned	The areas into which the mice were released were made complex by the addition of numerous objects and by overhead runs (see Plate VII, Fig. 1). Food was scattered liberally, and five water bottles were distributed through_x0002_out the area; a sawdust substrate was provided.	"Homecage behaviour" daily observations				Yes	Increasing area size - "cage size"	Within	No	Decreased fighting with increased area	After removal of the barrier there was a resurgence of aggression in the form of both fighting and unilateral attacks. In the 5-day period after dispersal the number of attacks per hour was significantly lower (mean = eleven) than it had been during days 1 to 5 of the pre-dispersal period
85	85.1	Poole, T.B and Morgan, H. D. R.	Animal Behaviour	1973	Differences in aggressive behaviour between male mice (Mus musculus L.) in colonies of different sizes	M.A.F.F. Veterinary Laboratories at Aberystwyth	Random bred supply	152 (according to Table 1)	10 to 14 weeks studied for 21 days	Male	3 OR 4 OR 5 OR 9 OR 12	Non-sibling	Firstly, each mouse was kept with its littermates, during which period it showed no aggression; on reaching maturity at 8 weeks it was then placed in a stock cage with thirty or forty unfamiliar male mice for at least 2 weeks. The mouse therefore had experienced aggression in these stock cages before the experimental colony was set up.	Observation cages made of galvanized steel with a 'Perspex' front; their dimensions were 0,6 m x 0.3 m2.	No cleaning during experiment	Each cage had a sawdust substrate and contained a small wire shelter and a superabundance of food pellets.	Home cage observations				Yes	Time	Within	No	Decreased aggression over time (although subordinates had a slight increase in the beginning (from an extremly low level))	Dominant mice in colonies of three, four or five mice: The dominant mouse in all colonies showed a very high level of aggression initially, followed by a progressive decline with time. The decline of aggression shown by the dominant was observed to be exponential rather than linear (see Fig. 2). Subordinate mice in colonies of three, four and five mice: In colony sizes three and four the subordin…
85	85.2	Poole, T.B and Morgan, H. D. R.	Animal Behaviour	1973	Differences in aggressive behaviour between male mice (Mus musculus L.) in colonies of different sizes	M.A.F.F. Veterinary Laboratories at Aberystwyth	Random bred supply	152 (according to Table 1)	10 to 14 weeks studied for 21 days	Male	4 OR 4 OR 5 OR 9 OR 12	Non-sibling	Firstly, each mouse was kept with its littermates, during which period it showed no aggression; on reaching maturity at 8 weeks it was then placed in a stock cage with thirty or forty unfamiliar male mice for at least 2 weeks. The mouse therefore had experienced aggression in these stock cages before the experimental colony was set up.	Observation cages made of galvanized steel with a 'Perspex' front; their dimensions were 0,6 m x 0.3 m2.	No cleaning during experiment	Each cage had a sawdust substrate and contained a small wire shelter and a superabundance of food pellets.	Home cage observations				Yes	Group size	Between	N/a	Increased aggression in larger groups 9 and 12 as compared to 3, 4 or 5.	In colonies of three, four, and five mice there were no changes in dominance over a 21-day period, although some changes in social structure occurred. Despotic dominance was pre-eminent in colony sizes three and four, whilst all three types of social structure occurred in colony size five. In colony sizes nine and twelve there were frequent changes of dominance and the social structure took the f…	The results presented here agree with those analysis, however, enabled us to make a fuller synthesis of our results than had been previously published. One of the aims of this work was to investigate of Brown (1953), Southwick (1955) and Christian (1956) in showing that more attacks are recorded in the larger colonies of mice, but if, however, the number of attacks is related to the number of mic…
86	86.1	Nadiaha,M.Y Nur M.B Halimatun Saadiaha,and S. Nurdianaa	APCBEE Procedia	2014	Effects of Different Resource Distribution on Behaviour and Corticosterone Level of Male Mice (Mus Musculus)	Not mentioned	Not mentioned	16	30 days after weaning, allowed to habituate for 2 weeks before experiment	Male	4	Not mentioned	2 weeks habituation in cage before experiment	Open cage - 2 cages with a transparent plastic tube as a connecting bridge	Not mentioned	A transparent plastic house, running wheel, water bottle and wood shaving for bedding were provided for each cage.	Home cage observations				Yes	Enrichement (clustered or dispersed: The resources for the first housing environment were clustered in only one cage and the other connected cage was left empty. Meanwhile, the resources in second type of housing environment were dispersed equally in both connected cages.)	Between	N/a	Decreased aggression with dispersed enrichment	The level of aggressive and stereotypic behaviour were observed to produce significant reduction in dispersed environment compared to clustered environment (p	This is due to more resources were accessible to mice and were equally divided within the two areas of the connected cages. Aggressive and stereotypic behaviour decreases significantly with more resources accessible
86	86.2	Nadiaha,M.Y Nur M.B Halimatun Saadiaha,and S. Nurdianaa	APCBEE Procedia	2014	Effects of Different Resource Distribution on Behaviour and Corticosterone Level of Male Mice (Mus Musculus)	Not mentioned	Not mentioned	16	30 days after weaning, allowed to habituate for 2 weeks before experiment	Male	4	Not mentioned	2 weeks habituation in cage before experiment	Open cage - 2 cages with a transparent plastic tube as a connecting bridge	Not mentioned	Food choice. In both treatment and control also CLUSTERED in one of the cages a transparent plastic house, running wheel, foods, water bottle and wood shaving for bedding were provided for each cage.	Home cage observations				Yes	Enrichment: Food choice on top of other enrichment clustered in one of the cages	Within	No	Decreased aggression when given food choice	The aggressive and stereotypic behavior decreased significantly (p<0.05) in the environment where food choices were available.
86	86.3	Nadiaha,M.Y Nur M.B Halimatun Saadiaha,and S. Nurdianaa	APCBEE Procedia	2014	Effects of Different Resource Distribution on Behaviour and Corticosterone Level of Male Mice (Mus Musculus)	Not mentioned	Not mentioned	16	30 days after weaning, allowed to habituate for 2 weeks before experiment	Male	4	Not mentioned	2 weeks habituation in cage before experiment	Open cage - 2 cages with a transparent plastic tube as a connecting bridge	Not mentioned	Food choice. In both treatment and control also DISPERSED in both cages a transparent plastic house, running wheel, foods, water bottle and wood shaving for bedding were provided for each cage.	Home cage observations				Yes	Enrichment: Food choice on top of other enrichment dispersed in both cages	Within	No	No difference in aggression when given food choice together with dispersed enrichment	With the food choices available in dispersed environment, it showed no significant difference (p>0.05)
87	87.1	Mondragón, R. Mayagoitia, L. López-Luján, A. and Díaz, J. L.	Behavioral and Neural Biology	1987	Social Structure Features in Three Inbred Strains of Mice, C57BI/6J, Balb/cj, and NIH: A Comparative Study	Not mentioned	C57BI/6J and NIH	182 in total: 42 C57/Bl6, 84 Balb/cj, 56 NIH	16-20 weeks, studied for 1 week	Male	7	Non-sibling	Until experimentation, all animals were kept living with their male siblings (three to five mice per cage).	Glass aquariums measuring 50 x 25 x 30 cm	Not mentioned	Sawdust, metal scale and running wheel, food given scattered over the sawdust	Home cage observations				Yes	Strain	Between	N/a	Increased aggression in NIH as compared to C57/Bl6	Aggression was found to be significantly different among strains (F(2, 23) = 12.7373, p < .005), the NIH groups being the more aggressive, followed by the Balb/cj animals. As strain aggressiveness increased (NIH > Balb/cj > C57B1/6j) the rate of Aggression among subordinates was higher, although not significantly different from the subordinates to dominant scores.
87	87.2	Mondragón, R. Mayagoitia, L. López-Luján, A. and Díaz, J. L.	Behavioral and Neural Biology	1987	Social Structure Features in Three Inbred Strains of Mice, C57BI/6J, Balb/cj, and NIH: A Comparative Study	Not mentioned	Balb/cj, and NIH	126 in total: 42 C57/Bl6, 84 Balb/cj	16-20 weeks, studied for 1 week	Male	7	Non-sibling	Until experimentation, all animals were kept living with their male siblings (three to five mice per cage).	Glass aquariums measuring 50 x 25 x 30 cm	Not mentioned	Sawdust, metal scale and running wheel, food given scattered over the sawdust	Home cage observations				Yes	Strain	Between	N/a	Increased aggression in NIH as compared to Balb/cj	Significantly incresed aggression in Balb/cj as compared to C57Bl/6j according to table 1. Aggression was found to be significantly different among strains (F(2, 23) = 12.7373, p < .005), the NIH groups being the more aggressive, followed by the Balb/cj animals. As strain aggressiveness increased (NIH > Balb/cj > C57B1/6j) the rate of Aggression among subordinates was higher, although not signifi…
87	87.3	Mondragón, R. Mayagoitia, L. López-Luján, A. and Díaz, J. L.	Behavioral and Neural Biology	1987	Social Structure Features in Three Inbred Strains of Mice, C57BI/6J, Balb/cj, and NIH: A Comparative Study	Not mentioned	C57BI/6J and Balb/cj	126 in total: 42 C57/Bl6, 84 Balb/cj	16-20 weeks, studied for 1 week	Male	7	Non-sibling	Until experimentation, all animals were kept living with their male siblings (three to five mice per cage).	Glass aquariums measuring 50 x 25 x 30 cm	Not mentioned	Sawdust, metal scale and running wheel, food given scattered over the sawdust	Home cage observations				Yes	Strain	Between	N/a	Increased aggression in Balb/cj as compared to C57/Bl6	Significantly incresed aggression in Balb/cj as compared to C57Bl/6j according to table 1. Aggression was found to be significantly different among strains (F(2, 23) = 12.7373, p < .005), the NIH groups being the more aggressive, followed by the Balb/cj animals. As strain aggressiveness increased (NIH > Balb/cj > C57B1/6j) the rate of Aggression among subordinates was higher, although not signifi…
88	88.1	Kikusui T, Takeuchi Y, and Mori Y	Physiology & Behavior	2004	Early weaning induces anxiety and aggression in adult mice	In house (breeding pair from Japan Clea (Yokohama, Japan)	Balb/c	60	Approx. 26 weeks at regrouping after isolation. Studied in group housing for 1 week	Male	3 to 4	Not mentioned	Treatment: Early weaned on PND14 or standard on PND21. After weaning in same-sex grops of 2-3 until 22 weeks. Then in isolation for a month before beeing regrouped 3-4 per cage and studied for wounds for a week	Open cage (12.5cm x 20cm x 11 cm)	Once weekly	Not mentioned	Wound count				Yes	Weaning age (effect on aggression after regrouping)	Between	N/a	Increased aggression in early weaned	The early_x0002_weaned mice had a significantly greater number of wounds than the normally weaned mice	NOTE: This experiment is studying groups of previously isolated mice
89	89.1	Ewaldsson, B. Nunes, S. Gaskill, B. Ferm, A. Stenberg, A. Pettersson, M. and Kastenmayer, R.	Scandinavian Journal of Laboratory Animal Science	2016	Who is a compatible partner for a male mouse?	Charles River, Germany (C57BL/6N males), in house (B6-GT(Rosa) males), Charles River, France (C57BL/6J and BALB/cJ females)	C57BL/6N and B6-GT(Rosa)26Sortm22(OS Luc Reporter)Aztc males, C57BL/6J and BALB/cJ females	60 (30 intact males, 10 castrated males and 20 ovariectomized females)	5 weeks (males when pairs were inititated)	Male and ovariectomized female	2	Non-sibling	Prior to the experiment, all experimental male and female mice were distributed and housed in groups of five of the same strain and sex in open top cages	Open cage (425x265x150mm)	Once weekly	Hardwood bedding, nesting material, shredded paper, gnawing sticks and a shelter	Home cage observations				Yes	Partner (castrated male or overectomized female)	Between	N/a	Decreased aggression when paired with overectomized female compared to castrated male	In all intact male/castrated male pairings a strong display of aggressive behavior (e.g. chasing, biting) was observed within the fi rst 20 minutes, always initiated by the intact male and independent of the genetic background. Our analysis showed that being housed with a castrated female regardless of strain reduced the likelihood of being separated due to aggression by 76% (F = 21.4%; M = 97.3%…	Overall, our results show that co-housing of intact male mice with castrated males is infeasible and that pairing with similar-age or older ovariectomized females is more successful, although with some variation in aggression based on strain background.
89	89.2	Ewaldsson, B. Nunes, S. Gaskill, B. Ferm, A. Stenberg, A. Pettersson, M. and Kastenmayer, R.	Scandinavian Journal of Laboratory Animal Science	2016	Who is a compatible partner for a male mouse?	Charles River, Germany (C57BL/6N males), Charles River, France (C57BL/6J and BALB/cJ females)	C57BL/6N (male) and BALB/cJ (male and female)	40 (20 intact males, 20 ovariectomized females)	5 weeks (males when pairs were inititated)	Male and ovariectomized female	2	Non-sibling	Prior to the experiment, all experimental male and female mice were distributed and housed in groups of five of the same strain and sex in open top cages	Open cage (425x265x150mm)	Once weekly	Hardwood bedding, nesting material, shredded paper, gnawing sticks and a shelter	Home cage observations				Yes	Strain of female partner	Between	N/a	Decreased aggression when paired with female from same strain	We found that if an intact male C57BL/6J is housed with another ovariectomized female C57BL/6 mouse this reduces the likelihood of being separated by approx_x0002_imately 45% compared with being housed with an ovariectomized female BALB/cJ mouse(C57BL/6J = 4.5% and BALB/cJ = 50%; χ2 = 7.71; P = 0.005). This information is from fig 2, however there is this type of cages also in fig 1. There the sa…	Overall, our results show that co-housing of intact male mice with castrated males is infeasible and that pairing with similar-age or older ovariectomized females is more successful, although with some variation in aggression based on strain background.
90	90.1	Welch, B. L. and Welch, A. S.	The Journal of Pharmacology and Experimental Therapeutics	1966	Graded effect of social stimulation upon d-amphetamine toxicity, aggressiveness and heart and adrenal weight	Dublin Animal Laboratories, Dublin, Virginia	DUB/ICR Swiss	255 (table 4)	5-6 weeks at arrival, experimental groups formed after 1 week and studied for 3 weeks	Male	2 OR 5 OR 10	Not mentioned	Kept in groups of 6 for 1 week after arrival before put into experimental groups	Hanging cages of wire mesh 5x10x6 inches for 2 mice and 10x10x6 inches for 5 and 10 mice	Not mentioned	Not mentioned	Home cage behaviour				Yes	Group size	Between	N/a	Decreased aggression in larger groups (see note!)	The number of fights per individual per unit time was greatest for the paired mice and progressively decreased through groups of 5 to a minimum in groups of 10, in which the frequency of individual involvment in fights was less than half the frequency occurring in paired animals. The trend for decrease in number of fights per individual per hour is highly significant (p=0.001)	NOTE: This is true when looking at the individual level. By the numbers for the groups (table 4) it looks like there is a higher incidence of fighting in groups of 5 or 10.
90	90.2	Welch, B. L. and Welch, A. S.	The Journal of Pharmacology and Experimental Therapeutics	1966	Graded effect of social stimulation upon d-amphetamine toxicity, aggressiveness and heart and adrenal weight	Dublin Animal Laboratories, Dublin, Virginia	DUB/ICR Swiss	210 (table 4)	5-6 weeks at arrival, experimental groups formed after 1 week and studied for 3 weeks	Male	2 OR 4 OR 8 OR 20	Not mentioned	Kept in groups of 6 for 1 week after arrival before put into experimental groups	Hanging cages of wire mesh 5x10x6 inches for 2 mice and 10x10x6 inches for 5 and 10 mice	Not mentioned	Not mentioned	Home cage behaviour				Yes	Group size	Between	N/a	Decreased aggression in larger groups (see note!)	The trend for reduction in aggressiveness with increseing group size, as measured by frequency of individual involvement in fights within groups, is statistically significant (p<0.001)	NOTE: This is true when looking at the individual level. By the numbers for the groups (table 4) it looks like there is a higher incidence of fighting in groups of 4 and that the numbers for groups of 2, 8 or 20 are very similar.
90	90.3	Welch, B. L. and Welch, A. S.	The Journal of Pharmacology and Experimental Therapeutics	1966	Graded effect of social stimulation upon d-amphetamine toxicity, aggressiveness and heart and adrenal weight	Dublin Animal Laboratories, Dublin, Virginia	DUB/ICR Swiss	148 (table 5)	5-6 weeks at arrival, experimental groups formed after 1 week and studied in neutral arena after 5 weeks	Male	2 OR 5 OR 10	Not mentioned	Kept in groups of 6 for 1 week after arrival before put into experimental groups	Hanging cages of wire mesh 5x10x6 inches for 2 mice and 10x10x6 inches for 5 and 10 mice	Not mentioned	Not mentioned	Neutral arena				Yes	Group size	Between	N/a	Decreased aggression in larger groups	Aggressiveness was greatest in isolated mice and was progressively less among mice that had lived in pairs, in groups if 5 and in groups of 10 mice. The trends for the latent period to become longer and for the incidence if fighting to be reduced with increasing group size are significant (p<0.001)	We have recently found that quantitative estimates of aggressiveness can be obtained with less labor if mice previously housed in the same sized groups, but in different cages, are paired in a cage strange ti both.

## Sheet: Suppl Table S2
Table S2. Strains, treatments and methods used to study aggression in all included articles
	Strains studied				Methods used to study aggression				Treatments studied
	BALB/c	C57BL/6	CD-1	Other	Home cage behaviour	Test for aggression	Wounding	General observation	Strain	Enrichment	Age/time	Group formation 1	Housing condition 2	Other 3
Abramov et al. 2008 Neuroscience Letters		x		x		x			x	x
Ambrose and Morton 2000 Journal of Applied Animal Welfare Science	x				x					x	x		x
Armstrong et al. 1998 Contemporary Topics in Laboratory Animal Science	x						x			x
Babineau et al. 2013 Physiology and Behavior		x		x	x				x
Bailoo et al. 2018 Scientific Reports	x							x				x	x
Barnard et al. 1994 Parasitology				x	x							x
Barnard et al. 1996 Physiology & Behavior				x	x					x		x
Bartolomucci et al. 2004 Physiology & Behavior			x		x							x
Benus and Henkelmann 1998 Behaviour				x	x						x
Bergmann et al. 1994 Journal of Experimental Animal Science				x			x						x
Bisazza 1981 Bollettino di Zoologia	x	x		x	x	x			x
Bishop and Chevins 1987 Behavioural Processes				x	x						x
Blankenberger et al. 2018 Applied Animal Behaviour Science				x	x		x					x
Bove et al. 2018 Behavioural Brain Research		x		x	x				x		x
Burright et al. 1988 Journal of Comparative Psychology				x		x					x
Clipperton-Allen et al. 2015 Journal of the American Association for Laboratory Animal Science	x	x			x				x	x
Collins 1970 Behavior Genetics				x			x							x
D’Andrea et al. 2007 Behavioural Brain Research			x		x							x
Eskola and Kaliste-Korhonen 1999 Laboratory Animals	x	x			x	x	x		x	x	x
Ewaldsson et al. 2016 Scandinavian Journal of Laboratory Animal Science	x	x		x	x									x
Fairless et al. 2013 Behavioural Brain Research	x	x			x				x		x
Fitchett et al. 2005 Behavioural Processes			x	x	x				x
Garris 2003 Brain Research			x				x	x			x
Gaskill et al. 2017 Lab Animal		x					x		x	x		x	x
Giles et al. 2018 Journal of the American Association for Laboratory Animal Science	x				x	x			x	x
Gray and Hurst 1995 Animal Behaviour				x	x								x
Grimm et al. 1996 Psycology and Behaviour				x	x						x	x
Haemisch and Gartner 1994 Journal of Experimental Animal Science				x		x			x	x	x
Haemisch and Gartner 1997 Acta Physiologica Scandinavia				x		x				x
Haemisch et al. 1994 Physiology & Behavior				x		x				x	x
Hilakivi-Clarke and Dickson 1995 Acta Oncologica				x				x			x	x
Hilakivi-Clarke and Lister 1992 Journal of Comparative Psychology				x				x				x
Howerton et al. 2008 Applied Animal Behaviour Science			x		x	x				x
Hunt and Hambly 2006 Physiology & Behavior				x	x					x		x	x
Kaliste et al. 2006 Comparative Medicine				x		x	x			x
Kaliste-Korhonen and Eskola 2000 Laboratory Animals				x		x	x					x
Kareem and Barnard 1982 Animal Behaviour				x		x					x	x
Kempf et al. 1984 Progress in Neuro-Psychopharmacology and Biological Psychiatry		x		x		x			x
Kikusui et al. 2004 Physiology & Behavior	x						x					x
Koyama and Kamimura 2000 Physiology & Behavior				x		x							x
Kunkel and Wang 2018 Behavioural Brain Research		x						x						x
Leduc et al. 2017 Journal of the American Association for Laboratory Animal Science				x	x					x
Lee et al. 2017 Proceedings the Royal Society Publishing Biology			x					x				x
Lewejohann et al. 2010 Behavioural Brain Research		x		x	x	x			x
Lima and Spinelli de Oliveira 2014 Behavioural Processes				x	x	x				x
Lockworth et al. 2015 Journal of the American Association for Laboratory Animal Sciences				x			x			x
Lofgren et al. 2012 Journal of the American Association for Laboratory Animal Sciences			x		x		x							x
Marashi et al. 2003 Hormones and Behavior				x	x					x
Marashi et al. 2004 Physiology & Behavior				x	x					x
Martinez-Cue et al. 2005 Behavioural Brain Research				x		x			x
McGregor and Ayling 1990 Applied Animal Behaviour Science				x		x				x			x
McNamara et al. 2018 Frontiers in Behavioural Neuroscience				x	x				x
McQuaid et al. 2012 Stress			x		x					x
McQuaid et al. 2013 International Journal of Neuropsychopharmacology	x				x	x	x			x
McQuaid et al. 2013 Psychoneuroendocrinology	x				x					x
McQuaid et al. 2018 Frontiers in Behavioural Neuroscience			x		x		x			x
Mesa-Gresa et al. 2013 Aggressive Behavior				x		x				x
Mondragón et al. 1987 Behavioral and Neural Biology	x	x		x	x				x
Nadiaha et al. 2014 APCBEE Procedia				x	x					x			x
Nakamura et al. 2016 Experimental Animals				x				x		x
Nicholson et al. 2009 Journal of the American Association for Laboratory Animal Science	x	x					x		x				x
O’Donnell et al. 1981 Behavioral and Neural Biology				x		x					x	x
Page and Glenner 1972 The American Journal of Pathology	x			x				x	x		x
Paterson et al. 1980 Physiology and Behavior				x				x						x
Poole and Morgan 1973 Animal Behaviour				x	x						x	x
Poole and Morgan 1976 Animal Behaviour				x	x						x		x
Rodriguez-Arias et al. 2013 Neuropharmacology			x	x		x			x
Rodriguez-Arias et al. 2015 Psychopharmacology				x		x			x
Rodriguiz et al. 2004 Behavioural Brain Research				x	x	x			x
Saldívar-González et al. 2007 Current Topics in Pharmacology	x				x							x
Smith et al. 2005 Comparative Medicine	x			x	x			x	x				x
Sorensen et al. 2005 Hormone and Metabolic Research		x		x	x				x		x	x	x
Svare and Leshner 1973 Journal of Comparative and Physiological Psychology				x		x					x
Swetter et al. 2011 Neuroscience Letters	x						x			x
Tallent et al. 2018 Laboratory Animals	x				x					x
Tan et al. 2018 Proceedings of the National Academy of Sciences of the United States of America				x		x		x	x
Terranova et al. 1993 Developmental Psychobiology			x			x					x
Terranova et al. 1998 Journal of Comparative Psychology			x			x		x			x
Trainor et al. 2007 Behavioral Neuroscience				x				x	x
Van der Meer et al. 2004 Laboratory Animals	x				x					x	x		x
Van Loo et al. 2000 Animal Welfare	x				x		x				x	x	x
Van Loo et al. 2001 Physiology & Behavior	x				x		x				x	x	x
Van Loo et al. 2002 Applied Animal Behaviour Science	x				x		x			x	x
Van Loo et al. 2003 Aggressive Behavior	x		x		x		x		x	x	x
Vaughan et al. 2014 Journal of the American Association for Laboratory Animal Sciences				x	x		x				x			x
Welch and Welch 1966 The Journal of Pharmacology and Experimental Therapeutics				x	x	x						x
Whitaker et al. 2009 Lab Animal		x						x						x
Williamson et al. 2017 Hormones and Behavior			x		x							x
Workman et al. 2011 Pharmacology, Biochemistry and Behavior		x				x				x
Zwirner et al. 1975 Psychopharmacologia				x				x			x
1. Group formation includes: group size, sibling/non-sibling, nesting condition, weaning age, age at group formation, group composition and applying changes to the group composition
2. Housing condition includes: cage size, density, cage setup, cleaning procedure, female mice close to cage, lightning paradigm, location, scent and identification method
3. Other includes: Castration, castrated male or female partner, brain weight as a selector as well as observations where no specific tratment was applied

## Sheet: Suppl Table S3
Table S3. Enrichment items used in the articles that specifically studied enrichment. The enrichment items used in the studies were placed into eight different categories. All belong to the pyhsical and nutritional enrichment types.
Physical enrichment						Nutritional
Nesting material	Shelter	Hiding device	Climbing structure	Locomotor enrichment	Other	Feed enrichment	Gnawing device
Kleenex	Box	Broken bricks and flowerpots	Climbing tree	Wheel	Cube	Food	Block
Nesting material	House	Cage divider	Fixed wheel		Extra plain	Sun flower seeds	Nylon bone
Nestlet	Igloo	Glass water bottle	Foothpath		Labyrinth with plane on top
Shreded paper	Nest box	Habitrail tube	Labyrinth		Lego devises
Wood wool	Pet hut	Inset	Ladder		Platform
	Shelter	Mezzanine	Ropes		Shelves
		Paper roll	Scaffolding		Toy
		Partition	Stairs
		Tube	Swing
		Tunnel

## Sheet: Suppl Table S4
Table S4. Articles that study the effect of enrichment items on aggression. Information on strain used, kinship in groups and types of enrichment studied. The different enrichment categories are defined in Table S3. BALB/c, C57BL/6, and CD-1 was most commonly used in the complete dataset and therefore color-coded in this table.
	Reference	Home cage behaviour	Test for aggression	Wounding	General observation	Strain	Group composition	Nesting material	Shelter	Hiding device	Climbing	Locomotor enrichment	Feed enrichment	Gnawing device	Other	Interior
Decreased aggression in enriched environment or with a specific form of enrichment	Abramov et al. 2008 Neuroscience Letters		x			129S6/SvEv/Tac	Non-sibling	x	x	x	x	x				Standard: bedding. Enriched: bedding, nesting material, stainless steel wheels or swings and aspen houses, igloos, ladders, tubes or labyrinths
	Ambrose et al. 2000 Journal of Applied Animal Welfare Science	x				BALB/c	Not mentioned			x						Enriched: Glass water bottle
						BALB/c	Not mentioned		x	x				x		Enriched: Sawdust substrate, tissue paper bedding, wooden block, tube, box
	Armstrong et al. 1998 Contemporary Topics in Laboratory Animal Science			x		BALB/cAnNHsd	Non-sibling	x								Standard: bedding. Enriched: corn-husk nesting material
	Clipperton-Allen et al. 2015 Journal of the American Association for Laboratory Animal Science	x				BALB/cAnNCrl	Non-sibling	x		x			x			Standard: bedding. Enriched: bedding, cotton nesting material (Nestlet), tube, wood wool, food reward
						C57BL/6NCrl	Non-sibling	x		x			x			Standard: bedding. Enriched: bedding, cotton nesting material (Nestlet), tube, wood wool, food reward
	Giles et al. 2018 Journal of the American Association for Laboratory Animal Science	x	x			BALB/cByJ	Non-sibling			x						Standard: cotton square as nesting material. Enriched: mezzanine
						BALB/cByJ	Non-sibling			x						Standard: shelter. Enriched: mezzanine
	Lima and Spinelli 2014 Behavioural Processes	x	x			Swiss	Non-sibling			x	x					Standard: wood shavings. Enriched: inset, scaffolding
	Nadiaha et al. 2014 APCBEE Procedia	x				Not mentioned	Not mentioned						x			Standard: bedding, transparent plastic house, running wheel, foods, water bottle all clusted in one cage. Enriched: as standard + food choice
	Nakamura et al. 2016 Experimental Animals				x	Jcl: ICR	Non-sibling			x	x				x	Standard: bedding. Enriched: ladder, cube, partition
	Tallent et al. 2018 Laboratory Animals	x				Balb/c	Non-sibling			x						Standard: bedding, nestlet square. Enriched: bedding, nestlet square, cage divider
	Van Loo et al. 2002 Applied Animal Behaviour Science	x		x		BALB/cAnNCRLBr	Non-sibling	x								Standard: Sawdust. Enriched: Kleenex
No effect on aggression in enriched environment or with a specific form of enrichment	Abramov et al. 2008 Neuroscience Letters		x			C57Bl/6	Non-sibling	x	x	x	x	x				Standard: bedding. Enriched: bedding, nesting material, stainless steel wheels or swings and aspen houses, igloos, ladders, tubes or labyrinths
	Eskola and Kaliste-Korhonen 1999 Laboratory Animals	x	x	x		BALB/c	Non-sibling	x								Standard: bedding. Enriched: Aspen wood woll as nesting material
						C57BL/6J	Non-sibling	x								Standard: bedding. Enriched: Aspen wood woll as nesting material
	Gaskill et al. 2017 Lab Animal			x		C57BL/6NCrl	Non-sibling	x								Control: aspen shavings. Enriched: as standard + nesting material
						C57BL/6NCrl	Non-sibling						x			Control: aspen shavings. Enriched: as standard + sunflower seeds
						C57BL/6NCrl	Non-sibling		x							Control: aspen shavings. Enriched: as standard + red pet hut
	Giles et al. 2018 Journal of the American Association for Laboratory Animal Science	x	x			BALB/cJ	Non-sibling		x							Standard: cotton square as nesting material. Enriched: shelter
						BALB/cJ	Non-sibling			x						Standard: cotton square as nesting material. Enriched: mezzanine
						BALB/cJ	Non-sibling			x						Standard: shelter. Enriched: mezzanine
						BALB/cByJ	Non-sibling		x							Standard: cotton square as nesting material. Enriched: shelter
	Haemisch and Gartner 1994 Journal of Experimental Animal Science		x			CBA/J	Non-sibling				x					Enriched: Horizontal labyrinth at the cage bottom with a plane on top. Both accessible by holes in diagonal corners
	Hunt and Hambly 2006 Physiology & Behavior	x				MF1	Non-sibling			x						Standard: house, sawdust, paper bedding. Enriched: sawdust, house, bedding squares, tube
	Kaliste et al. 2006 Comparative Medicine		x	x		NIH/S	Non-sibling	x		x						Control: bedding. Enrichment: nesting material and a tube
	Lockworth et al. 2015 Journal of the American Association for Laboratory Animal Sciences			x		Athymic NCrnu/nu	Not mentioned							x		Standard: cotton squares. Enriched: nylon bone
						Athymic NCrnu/nu	Not mentioned		x			x				Standard: cotton squares. Enriched: mouse house and wheel
						Athymic NCrnu/nu	Not mentioned			x						Standard: cotton squares. Enriched: paper rolls
						Athymic NCrnu/nu	Not mentioned	x								Standard: cotton squares. Enriched: shredded paper
	Marashi et al. 2003 Hormones and Behavior	x				Congenic mice strain CS of the inbread strain ABG	Siblings				x		x		x	Standard: plastic inset, wooden scaffolding. Enriched: extra plains, plastic stairs, wooden footpaths, hemp ropes, climbing tree, food and water at a second food place
	Marashi et al. 2004 Physiology & Behavior	x				ABG	Siblings			x	x					Standard: wood shavings. Enriched: inset, scaffolding
						ABG	Siblings				x		x		x	Standard: wood shavings. Enriched: extra plains, stairs, footpaths, ropes, climbing tree, food and water at a second food place
						ABG	Siblings				x		x		x	Standard: inset, scaffolding. Enriched: plains, stairs, footpaths, ropes, climbing tree, food and water at a second food place
	Nadiaha et al. 2014 APCBEE Procedia	x				Not mentioned	Not mentioned						x			Standard: house, running wheel, foods, water bottle dispersed in both cages. Enriched: as standard + food choice
	Swetter et al. 2011 Neuroscience Letters			x		BALB/cJ	Not mentioned		x							Standard: bedding. Enriched: igloo
						BALB/cJ	Not mentioned		x						x	Standard: bedding. Enriched: igloo, toy
						BALB/cJ	Not mentioned		x			x				Standard: bedding. Enriched: igloo, running wheel
						BALB/cJ	Not mentioned								x	Standard: igloo. Enriched: igloo, toy
	Van der Meer et al. 2004 Laboratory Animals	x				BALB/cAnNCrlBR	Non-sibling	x								Standard: sawdust. Enriched: nesting material (two Kleenex tissues)
	Van Loo et al. 2003 Aggressive Behavior	x		x		BALB/cAnNCrlBR (BALB/c)	Non-sibling	x								Standard: sawdust. Enriched: nesting material (two Kleenex tissues)
						CRL:CD-1(ICR)BR (CD-1)	Non-sibling	x								Standard: sawdust. Enriched: nesting material (two Kleenex tissues)
						BALB/cAnNCrlBR (BALB/c)	Non-sibling		x							Enriched: house
						CRL:CD-1(ICR)BR (CD-1)	Non-sibling			x						Enriched: tube
	Workman et al. 2011 Pharmacology, Biochemistry and Behavior		x			C57Bl6/J	Non-sibling		x	x		x				Enriched: running wheel, nest box, habitrail tube
Increased aggression in enriched environment or with a specific form of enrichment	Barnard et al. 1996 Physiology & Behavior	x				CFLP	Non-sibling		x						x	Enriched: shelves, nest boxes
	Haemisch and Gartner 1994 Journal of Experimental Animal Science		x			DBA/2J	Siblings								x	Enriched: labyrinth with plane on top
	Haemisch and Gartner 1997 Acta Physiologica Scandinavia		x			DBA/2J	Not mentioned				x					Enriched: labyrinth
	Howerton et al. 2008 Applied Animal Behaviour Science	x	x			CD-1 (ICR)	Sibling		x		x					Standard: bedding. Enriched: igloo with fixed wheel
						CD-1 (ICR)	Sibling		x			x				Standard: bedding. Enriched: igloo with running wheel
	Kaliste et al. 2006 Comparative Medicine		x	x		NIH/S	Non-sibling	x								Standard: bedding. Enriched: nesting material
						NIH/S	Non-sibling	x	x							Standard: bedding. Enriched: nesting material, box
	Leduc et al. 2017 Journal of the American Association for Laboratory Animal Science	x				FVB;129-Arhgap19Gt(YHD020)Byg/Hemc	Sibling		x			x				Standard: house. Enriched: igloo with running wheel
	Marashi et al. 2003 Hormones and Behavior	x				Congenic mice strain CS of the inbread strain ABG	Siblings			x	x					Standard: wood shavings. Enriched: inset, scaffolding
						Congenic mice strain CS of the inbread strain ABG	Siblings				x		x		x	Standard: wood shavings. Enriched: plains, stairs, footpaths, ropes, climbing tree, food and water at a second place
	McGregor and Ayling 1990 Applied Animal Behaviour Science		x			CFLP	Not mentioned			x						Standard: sawdust. Enriched: broken bricks and flowerpots
	McQuaid et al. 2012 Stress	x				CD-1	Not mentioned		x	x		x				Standard: nestlet. Enriched: nestlets, running wheels, shelter, shelter with an angled running wheel, tunnels
	Mesa-Gresa et al. 2013 Aggressive Behavior		x			NMRI	Not mentioned		x	x		x			x	Enriched: house, running wheel, tunnel, toys
	Swetter et al. 2011 Neuroscience Letters			x		BALB/cJ	Not mentioned					x				Standard: igloo. Enriched: igloo with running wheel
	Van Loo et al. 2002 Applied Animal Behaviour Science	x		x		BALB/cAnNCRLBr	Non-sibling		x							Standard: sawdust. Enriched: shelter
Outcome dependent on method used to measure aggression	Haemisch et al. 1994 Physiology & Behavior		x			DBA/2J	Sibling								x	Enriched: platform on vertical dividers. Top floor accessible through holes in oposite corners of the cage.
	McQuaid et al. 2013 International Journal of Neuropsychopharmacology	x	x	x		BALB/cByJ	Not mentioned		x	x		x				Standard: cotton nestlet. Enriched: running wheels, shelter with angled running wheel, tunnels, nestlets
	McQuaid et al. 2013 Psychoneuroendocrinology	x				BALB/cByJ	Non-sibling		x	x		x				Standard: cotton nestlet. Enriched: running wheels, shelter, shelter with angled running wheel, tunnels, nestlets
	McQuaid et al. 2018 Frontiers in Behavioural Neuroscience	x		x		CD-1	Sibling		x	x		x				Standard: nestlet. Enriched: running wheels, shelter, shelter with angled running wheel, tunnels, nestlets

## Sheet: Suppl Table S5
Table S5. Articles that study the effect of time spent in group. Information on time studied, strain and methods used to study aggression
	Reference	Time studied	Strain	Home cage behaviour	Test for aggression	Wounding	General observation
Decreased aggression with time spent in group	Grimm et al. 1996 Psycology and Behaviour	4 days	DD/S a	x
	Bishop and Chevins 1987 Behavioural Processes	5 days	TO	x
	Bove et al. 2018 Behavioural Brain Research	5 days	BTBR	x
	Burright et al. 1988 Journal of Comparative Psychology	9 days	HET b		x
	Poole and Morgan 1976 Animal Behaviour	1,5 weeks	LACA/CFW	x
	Van der Meer et al. 2004 Laboratory Animals	2 weeks	BALB/c	x
	Poole and Morgan 1973 Animal Behaviour	3 weeks	Random bred supply	x
	Vaughan et al. 2014 Journal of the American Association for Laboratory Animal Sciences	13 weeks	Swiss	x		x
	Hilakivi-Clarke and Dickson 1995 Acta Oncologica	30 weeks	Tg of CD-1				x
	Page and Glenner 1972 The American Journal of Pathology	40 weeks	Varying strains				x
No effect on aggression with time spent in group	Svare and Leshner 1973 Journal of Comparative and Physiological Psychology	3 days	Albino mice		x
	Grimm et al. 1996 Psycology and Behaviour	4 days	DD/S a	x
	Bove et al. 2018 Behavioural Brain Research	5 days	C57BL/6	x
	O’Donnell et al. 1981 Behavioral and Neural Biology	2 weeks	Swiss-Webster		x
	Kareem and Barnard 1982 Animal Behaviour	5,5 weeks	CFLP		x
	Haemisch and Gartner 1994 Journal of Experimental Animal Science	6 weeks	DBA/2 c		x
	Haemisch et al. 1994 Physiology & Behavior	6 weeks	DBA/2 d		x
	Haemisch and Gartner 1994 Journal of Experimental Animal Science	6 weeks	CBA e		x
	Fairless et al. 2013 Behavioural Brain Research	6,5 weeks	BALB/c	x
	Fairless et al. 2013 Behavioural Brain Research	6,5 weeks	C57BL/6	x
Increased aggression with time spent in group	Burright et al. 1988 Journal of Comparative Psychology	9 days	HET b		x
	Zwirner et al. 1975 Psychopharmacologia	3 weeks	OF-1				x
	Garris 2003 Brain Research	4 weeks	CD-1			x	x
	Terranova et al. 1993 Developmental Psychobiology	4 weeks	CD-1		x
	Terranova et al. 1998 Journal of Comparative Psychology	4 weeks	CD-1		x		x
	Eskola and Kaliste-Korhonen 1999 Laboratory Animals	4 weeks	BALB/c	x	x	x
	Eskola and Kaliste-Korhonen 1999 Laboratory Animals	4 weeks	C57BL/6	x	x	x
	Benus and Henkelmann 1998 Behaviour	4,5 weeks	LAL-line	x
	Haemisch et al. 1994 Physiology & Behavior	6 weeks	DBA/2 d		x
	Haemisch and Gartner 1994 Journal of Experimental Animal Science	6 weeks	DBA/2J c		x
	Haemisch and Gartner 1994 Journal of Experimental Animal Science	6 weeks	CBA/J e		x
	Sorensen et al. 2005 Hormone and Metabolic Research	7 weeks	Tg of C57BL/6	x
	Ambrose and Morton 2000 Journal of Applied Animal Welfare Science	8 weeks	BALB/c f	x
	Ambrose and Morton 2000 Journal of Applied Animal Welfare Science	8 weeks	BALB/c f	x
	Van Loo et al. 2000 Animal Welfare	9 weeks	BALB/c	x		x
	Van Loo et al. 2002 Applied Animal Behaviour Science	11 weeks	BALB/c	x		x
	Van Loo et al. 2003 Aggressive Behavior	12 weeks	BALB/c	x		x
	Van Loo et al. 2003 Aggressive Behavior	12 weeks	CD-1	x		x
	Van Loo et al. 2001 Physiology & Behavior	14 weeks	BALB/c	x		x
a. Decreased aggression in groups of 5 but no difference in groups of 3.
b. Increase aggression when tested on clean shavings but decreased on female soiled shavings
c. In enriched cages increased aggression but no effect in standard.
d. In enriched cages increased aggression but no effect in standard.
e. In enriched cages increased aggression but no effect in standard.
f. Increased aggression independent of enrichment
